# Supplementary material for: Transpiration of a Tropical Dry Deciduous Forest in Yucatan, Mexico
Source: MDPI journal article supplement (doi:10.3390/atmos13020271), 2022-02-05
Supplement: s1 [file s1]

## Supplementary Materials:

# Transpiration of a Tropical Dry Deciduous Forest in Yucatan, Mexico

Evelyn Raquel Salas-Acosta <sup>1</sup>, José Luis Andrade <sup>2</sup>, Jorge Adrián Perera-Burgos<sup>1</sup>, Roberth Us-Santamaría <sup>2</sup>, Bernardo Figueroa-Espinoza <sup>3</sup>, Jorge M. Uuh-Sonda <sup>4</sup> and Eduardo Cejudo<sup>1,\*</sup>

<sup>1</sup> CONACYT - Centro de Investigación Científica de Yucatán, Unidad de Ciencias del Agua, Cancún, 77500, México; evelynraquel.salas@gmail.com (E.R.S.-A.); jorge.perera@cicy.mx (J.A.P.-B.)

<sup>2</sup> Centro de Investigación Científica de Yucatán - Unidad de Recursos Naturales, Mérida, Yucatán 97205, México; andrade@cicy.mx (J.L.A.); roberthus@cicy.mx (R.U.-S.)

<sup>3</sup> Laboratorio de Ingeniería y Procesos Costeros, Instituto de Ingeniería, Universidad Nacional Autónoma de México. Sisal, Yucatán, 97355, México. bfigueroae@ingen.unam.mx

<sup>4</sup> Departamento de Ciencias del Agua y Medio Ambiente, Instituto Tecnológico de Sonora, Obregón, Sonora. C.P. 85000, México. jorge.uuh.sonda@gmail.com

\* Correspondence: eduardo.cejudo@cicy.mx

**Citation:** Salas-Acosta, E.R.; Andrade, J.L.; Perera-Burgos, J.A.; Us-Santamaría, R.; Figueroa-Espinoza, B.; Uuh-Sonda, J.M.; Cejudo, E. Transpiration of a Tropical Dry Deciduous Forest in Yucatan, Mexico. *Atmosphere* **2022**, *13*, 271. <https://doi.org/10.3390/atmos13020271>

Academic Editors: Xiangjin Shen and Binhui Liu

Received: 21 December 2021

Accepted: 3 February 2022

Published: 5 February 2022

**Publisher's Note:** MDPI stays neutral with regard to jurisdictional claims in published maps and institutional affiliations.

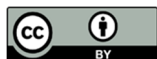

**Copyright:** © 2022 by the authors. Submitted for possible open access publication under the terms and conditions of the Creative Commons Attribution (CC BY) license (<https://creativecommons.org/licenses/by/4.0/>).

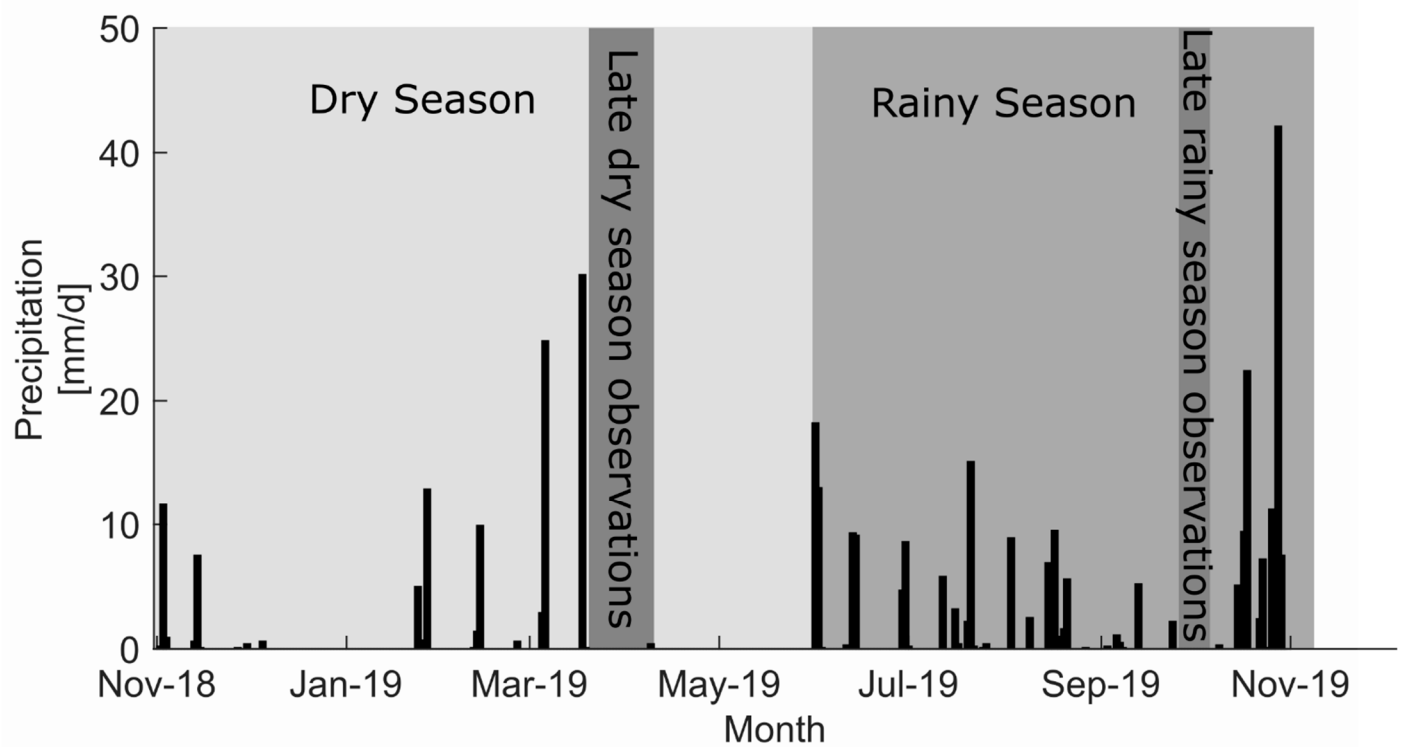

Figure S1. Daily precipitation time series.

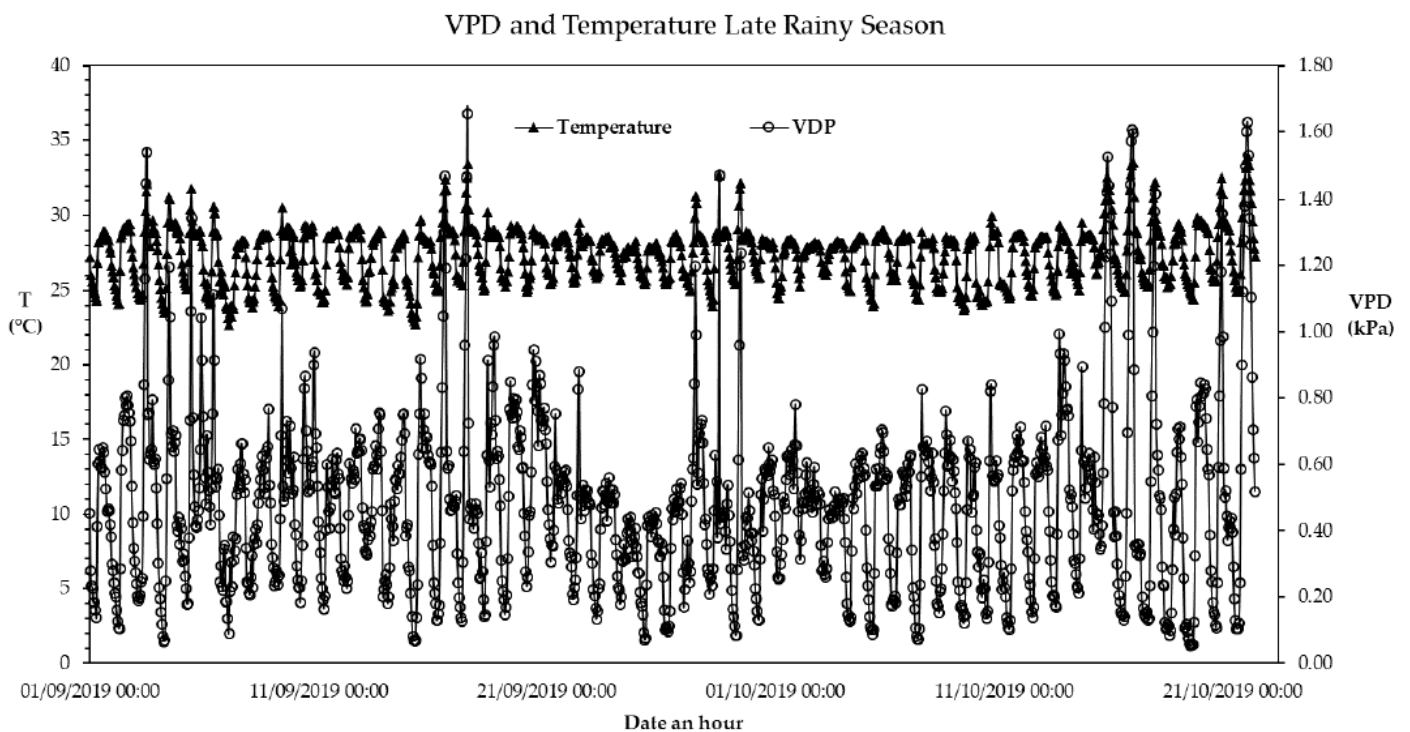

Figure S2. VPD, and temperature during the sap flux measurements period.

**Table S1.** Species-Transpiration

| Season       | Species         | n<br>(days) | BHD<br>(cm) | CS<br>(cm <sup>2</sup> ) | BA<br>(m <sup>2</sup> ) | T (kg d <sup>-1</sup> ) | s.d  | Variance |
|--------------|-----------------|-------------|-------------|--------------------------|-------------------------|-------------------------|------|----------|
| Dry season   | Bs <sub>1</sub> | 4           | 16.87       | 123                      | 0.02                    | 11.4                    | 2.7  | 7.0      |
| Dry season   | Bs <sub>2</sub> | 5           | 16.55       | 181                      | 0.02                    | 18.4                    | 2.2  | 4.7      |
| Dry season   | Bs <sub>3</sub> | 4           | 14.64       | 116                      | 0.02                    | 5.3                     | 0.3  | 0.1      |
| Dry season   | Cg <sub>1</sub> | 2           | 19.74       | 72                       | 0.03                    | 7.6                     | 2.7  | 7.4      |
| Dry season   | Cg <sub>2</sub> | 5           | 13.37       | 49                       | 0.01                    | 4.9                     | 0.8  | 0.6      |
| Dry season   | Cog             | 8           | 14.32       | 54                       | 0.02                    | 6.9                     | 0.7  | 0.4      |
| Dry season   | Csp             | 4           | 9.55        | 37                       | 0.01                    | 6.9                     | 1.9  | 3.6      |
| Dry season   | Er              | 4           | 12.1        | 58                       | 0.01                    | 5.4                     | 0.5  | 0.2      |
| Dry season   | Gf <sub>1</sub> | 4           | 14.64       | 146                      | 0.02                    | 3.5                     | 0.7  | 0.5      |
| Dry season   | Gf <sub>2</sub> | 5           | 10.5        | 72                       | 0.01                    | 7.1                     | 1.7  | 3.0      |
| Dry season   | Gf <sub>3</sub> | 3           | 8.59        | 57                       | 0.01                    | 7.2                     | 1.1  | 1.3      |
| Dry season   | Ha <sub>1</sub> | 9           | 21.32       | 70                       | 0.04                    | 12.8                    | 3.0  | 8.7      |
| Dry season   | Ha <sub>2</sub> | 4           | 23.55       | 71.87                    | 0.04                    | 11.4                    | 0.6  | 0.3      |
| Dry season   | Ll <sub>1</sub> | 3           | 38.2        | 232                      | 0.11                    | 38.5                    | 7.8  | 60.9     |
| Dry season   | Ll <sub>2</sub> | 4           | 28.01       | 81                       | 0.06                    | 18.0                    | 1.6  | 2.4      |
| Dry season   | Nc              | 5           | 10.82       | 78                       | 0.01                    | 16.2                    | 1.3  | 1.7      |
| Dry season   | Po <sub>1</sub> | 3           | 15.6        | 151                      | 0.02                    | 14.1                    | 1.8  | 3.4      |
| Dry season   | Po <sub>2</sub> | 7           | 10.82       | 72                       | 0.01                    | 6.7                     | 0.7  | 0.4      |
| Dry season   | Pp              | 2           | 20.37       | 147                      | 0.03                    | 19.7                    | 5.7  | 32.5     |
| Rainy season | Bs <sub>1</sub> | 5           | 17.51       | 181                      | 0.02                    | 24.0                    | 4.1  | 17.0     |
| Rainy season | Bs <sub>2</sub> | 6           | 15.92       | 123                      | 0.02                    | 15.7                    | 2.7  | 7.1      |
| Rainy season | Bs <sub>3</sub> | 7           | 14.96       | 116                      | 0.02                    | 9.5                     | 3.0  | 8.8      |
| Rainy season | Cg <sub>1</sub> | 6           | 20.69       | 72                       | 0.03                    | 28.4                    | 29.4 | 864.6    |
| Rainy season | Cg <sub>2</sub> | 6           | 14.01       | 49                       | 0.02                    | 8.2                     | 1.5  | 2.3      |
| Rainy season | Cog             | 6           | 14.32       | 54                       | 0.02                    | 14.9                    | 14.7 | 217.2    |
| Rainy season | Er              | 6           | 12.41       | 58                       | 0.01                    | 8.3                     | 0.3  | 0.1      |
| Rainy season | Gf <sub>1</sub> | 11          | 11.46       | 72                       | 0.01                    | 9.1                     | 1.5  | 2.3      |
| Rainy season | Gf <sub>2</sub> | 10          | 9.87        | 57                       | 0.01                    | 7.9                     | 0.9  | 0.8      |
| Rainy season | Gf <sub>3</sub> | 10          | 14.96       | 146                      | 0.02                    | 16.4                    | 1.7  | 3.0      |
| Rainy season | Ha <sub>1</sub> | 7           | 21.96       | 71.85                    | 0.05                    | 10.3                    | 4.2  | 17.7     |
| Rainy season | Ha <sub>2</sub> | 10          | 24.51       | 70.00                    | 0.04                    | 9.57 ±                  | 1.6  | 2.4      |
| Rainy season | Ll <sub>1</sub> | 6           | 39.15       | 232                      | 0.12                    | 24.7                    | 10.4 | 107.8    |
| Rainy season | Ll <sub>2</sub> | 11          | 23.87       | 98                       | 0.04                    | 15.9                    | 4.3  | 18.2     |
| Rainy season | Ll <sub>3</sub> | 10          | 28.01       | 81                       | 0.06                    | 19.0                    | 1.6  | 2.4      |
| Rainy season | Nc <sub>1</sub> | 5           | 11.46       | 78                       | 0.01                    | 15.1                    | 12.7 | 161.8    |
| Rainy season | Nc <sub>2</sub> | 8           | 8.82        | 46                       | 0.01                    | 5.0                     | 1.3  | 1.7      |
| Rainy season | Po <sub>1</sub> | 4           | 15.92       | 151                      | 0.02                    | 17.3                    | 12.3 | 150.7    |
| Rainy season | Po <sub>2</sub> | 12          | 10.82       | 72                       | 0.01                    | 13.4                    | 2.5  | 6.3      |

| Rainy season      | Pp                                   | 6                                               | 21.17 | 147 | 0.04 | 22.7 | 4.5 | 15.4 |
|-------------------|--------------------------------------|-------------------------------------------------|-------|-----|------|------|-----|------|
| Season            | Species Code                         | Species name                                    |       |     |      |      |     |      |
| Dry sea-<br>son   | Bs <sub>1</sub>                      | <i>Bursera simaruba</i> (L.) Sarg.              |       |     |      |      |     |      |
|                   | Bs <sub>2</sub>                      | <i>Bursera simaruba</i> (L.) Sarg.              |       |     |      |      |     |      |
|                   | Bs <sub>3</sub>                      | <i>Bursera simaruba</i> (L.) Sarg.              |       |     |      |      |     |      |
|                   | Cg1                                  | <i>Caesalpinia gaumeri</i> Greenm.              |       |     |      |      |     |      |
|                   | Cg2                                  | <i>Caesalpinia gaumeri</i> Greenm.              |       |     |      |      |     |      |
|                   | Cog                                  | <i>Cordia gerascanthus</i> L.                   |       |     |      |      |     |      |
|                   | Csp                                  | <i>Caesalpinia</i> sp.                          |       |     |      |      |     |      |
|                   | Er                                   | <i>Erythroxylum rotundifolium</i> Lunan         |       |     |      |      |     |      |
|                   | Gf <sub>1</sub>                      | <i>Gymnopodium floribundum</i> Rolfe            |       |     |      |      |     |      |
|                   | Gf <sub>2</sub>                      | <i>Gymnopodium floribundum</i> Rolfe            |       |     |      |      |     |      |
|                   | Gf <sub>3</sub>                      | <i>Gymnopodium floribundum</i> Rolfe            |       |     |      |      |     |      |
|                   | Ha <sub>1</sub>                      | <i>Havardia albicans</i> (Kunth) Britton & Rose |       |     |      |      |     |      |
|                   | Ha <sub>2</sub>                      | <i>Havardia albicans</i> (Kunth) Britton & Rose |       |     |      |      |     |      |
|                   | Ll <sub>1</sub>                      | <i>Lysiloma latisiliquum</i> (L.) Benth.        |       |     |      |      |     |      |
|                   | Ll <sub>2</sub>                      | <i>Lysiloma latisiliquum</i> (L.) Benth.        |       |     |      |      |     |      |
|                   | Nc                                   | <i>Neea choriophylla</i> Standl.                |       |     |      |      |     |      |
|                   | Po <sub>1</sub>                      | <i>Plumeria obtusa</i> L.                       |       |     |      |      |     |      |
| Po <sub>2</sub>   | <i>Plumeria obtusa</i> L.            |                                                 |       |     |      |      |     |      |
| Pp                | <i>Piscidia piscipula</i> (L.) Sarg. |                                                 |       |     |      |      |     |      |
| Rainy sea-<br>son | Bs <sub>1</sub>                      | <i>Bursera simaruba</i> (L.) Sarg.              |       |     |      |      |     |      |
|                   | Bs <sub>2</sub>                      | <i>Bursera simaruba</i> (L.) Sarg.              |       |     |      |      |     |      |
|                   | Bs <sub>3</sub>                      | <i>Bursera simaruba</i> (L.) Sarg.              |       |     |      |      |     |      |
|                   | Cg <sub>1</sub>                      | <i>Caesalpinia gaumeri</i> Greenm.              |       |     |      |      |     |      |
|                   | Cg <sub>2</sub>                      | <i>Caesalpinia gaumeri</i> Greenm.              |       |     |      |      |     |      |
|                   | Cog                                  | <i>Cordia gerascanthus</i> L.                   |       |     |      |      |     |      |
|                   | Er                                   | <i>Erythroxylum rotundifolium</i> Lunan         |       |     |      |      |     |      |
|                   | Gf <sub>1</sub>                      | <i>Gymnopodium floribundum</i> Rolfe            |       |     |      |      |     |      |
|                   | Gf <sub>2</sub>                      | <i>Gymnopodium floribundum</i> Rolfe            |       |     |      |      |     |      |
|                   | Gf <sub>3</sub>                      | <i>Gymnopodium floribundum</i> Rolfe            |       |     |      |      |     |      |
|                   | Ha <sub>1</sub>                      | <i>Havardia albicans</i> (Kunth) Britton & Rose |       |     |      |      |     |      |
|                   | Ha <sub>2</sub>                      | <i>Havardia albicans</i> (Kunth) Britton & Rose |       |     |      |      |     |      |
|                   | Ll <sub>1</sub>                      | <i>Lysiloma latisiliquum</i> (L.) Benth.        |       |     |      |      |     |      |
|                   | Ll <sub>2</sub>                      | <i>Lysiloma latisiliquum</i> (L.) Benth.        |       |     |      |      |     |      |
|                   | Ll <sub>3</sub>                      | <i>Lysiloma latisiliquum</i> (L.) Benth.        |       |     |      |      |     |      |
|                   | Nc <sub>1</sub>                      | <i>Neea choriophylla</i> Standl.                |       |     |      |      |     |      |
|                   | Nc <sub>2</sub>                      | <i>Neea choriophylla</i> Standl.                |       |     |      |      |     |      |
| Po <sub>1</sub>   | <i>Plumeria obtusa</i> L.            |                                                 |       |     |      |      |     |      |

Po<sub>2</sub> *Plumeria obtusa* L.  
Pp *Piscidia piscipula* (L.) Sarg.

**Table S2.** VPD, and temperature during the sap flux measurements period.

| TIMESTAMP           | Temp_Avg | RH_Avg | Rad_Avg          | VPD   | SWC* |
|---------------------|----------|--------|------------------|-------|------|
| yyyy-mm-dd HH:MM:SS | °C       | %      | W/m <sup>2</sup> | (kPa) | %    |
| 2019/3/1 0:00       | 25.2     | 62.68  | -0.8             | 1.03  |      |
| 2019/3/1 1:00       | 24.45    | 69.37  | -0.8             | 0.82  |      |
| 2019/3/1 2:00       | 23.74    | 73.76  | -1               | 0.68  |      |
| 2019/3/1 3:00       | 22.88    | 78.99  | -0.9             | 0.53  |      |
| 2019/3/1 4:00       | 22.4     | 82.3   | -1.1             | 0.44  |      |
| 2019/3/1 5:00       | 21.85    | 85     | -1.1             | 0.36  |      |
| 2019/3/1 6:00       | 21.09    | 88.71  | -1               | 0.26  |      |
| 2019/3/1 7:00       | 20.73    | 90.22  | 30.3             | 0.23  |      |
| 2019/3/1 8:00       | 21.59    | 87.66  | 225              | 0.30  |      |
| 2019/3/1 9:00       | 24.1     | 80.22  | 449.8            | 0.52  |      |
| 2019/3/1 10:00      | 26.73    | 69.37  | 607.8            | 0.89  |      |
| 2019/3/1 11:00      | 28.35    | 60.84  | 698.8            | 1.20  |      |
| 2019/3/1 12:00      | 29.7     | 53.56  | 789.9            | 1.48  |      |
| 2019/3/1 13:00      | 30.66    | 47.19  | 813.1            | 1.73  |      |
| 2019/3/1 14:00      | 30.77    | 50.4   | 947.3            | 1.63  |      |
| 2019/3/1 15:00      | 26.11    | 84.94  | 745.2            | 0.43  |      |
| 2019/3/1 16:00      | 26.03    | 85.23  | 558.1            | 0.42  |      |
| 2019/3/1 17:00      | 26.39    | 82.06  | 314.9            | 0.52  |      |
| 2019/3/1 18:00      | 26.5     | 82.6   | 88.9             | 0.50  |      |
| 2019/3/1 19:00      | 26.28    | 85.46  | 0                | 0.42  |      |
| 2019/3/1 20:00      | 26.1     | 87.95  | -1.1             | 0.34  |      |
| 2019/3/1 21:00      | 26.04    | 90.17  | -0.9             | 0.28  |      |
| 2019/3/1 22:00      | 25.7     | 81.68  | -1.1             | 0.51  |      |
| 2019/3/1 23:00      | 25.91    | 66.97  | -1.1             | 0.93  |      |
| 2019/3/2 0:00       | 25.61    | 69.01  | -0.9             | 0.87  |      |
| 2019/3/2 1:00       | 24.71    | 74.91  | -0.8             | 0.68  |      |
| 2019/3/2 2:00       | 23.93    | 79.85  | -0.8             | 0.53  |      |
| 2019/3/2 3:00       | 23.32    | 83.56  | -0.9             | 0.42  |      |
| 2019/3/2 4:00       | 22.85    | 86.93  | -0.9             | 0.33  |      |
| 2019/3/2 5:00       | 22.2     | 90.23  | -0.9             | 0.24  |      |
| 2019/3/2 6:00       | 21.74    | 92.61  | -1.1             | 0.18  |      |
| 2019/3/2 7:00       | 21.59    | 93.12  | 32.2             | 0.16  |      |
| 2019/3/2 8:00       | 22.29    | 91     | 221.4            | 0.22  |      |
| 2019/3/2 9:00       | 24.88    | 81.57  | 461              | 0.50  |      |
| 2019/3/2 10:00      | 27.41    | 64.9   | 691.4            | 1.04  |      |
| 2019/3/2 11:00      | 29.14    | 55.77  | 857.8            | 1.39  |      |

|                |       |       |       |      |
|----------------|-------|-------|-------|------|
| 2019/3/2 12:00 | 30.86 | 47.42 | 932.8 | 1.74 |
| 2019/3/2 13:00 | 31.92 | 42.6  | 947.5 | 1.95 |
| 2019/3/2 14:00 | 32.92 | 39.4  | 852.1 | 2.12 |
| 2019/3/2 15:00 | 28.06 | 74.56 | 595.4 | 0.77 |
| 2019/3/2 16:00 | 26.81 | 81.76 | 541.6 | 0.53 |
| 2019/3/2 17:00 | 26.18 | 85.92 | 323   | 0.40 |
| 2019/3/2 18:00 | 26.18 | 85.33 | 86    | 0.42 |
| 2019/3/2 19:00 | 26.12 | 85.59 | 0     | 0.41 |
| 2019/3/2 20:00 | 26.16 | 86.57 | -1    | 0.38 |
| 2019/3/2 21:00 | 25.84 | 87.26 | -0.9  | 0.36 |
| 2019/3/2 22:00 | 24.95 | 86.51 | -1.1  | 0.37 |
| 2019/3/2 23:00 | 25.44 | 71.19 | -1.2  | 0.80 |
| 2019/3/3 0:00  | 25.6  | 69.49 | -1.1  | 0.85 |
| 2019/3/3 1:00  | 25    | 72.87 | -0.8  | 0.74 |
| 2019/3/3 2:00  | 24.17 | 78.09 | -0.8  | 0.58 |
| 2019/3/3 3:00  | 23.39 | 83.49 | -0.9  | 0.43 |
| 2019/3/3 4:00  | 22.89 | 87.56 | -1    | 0.31 |
| 2019/3/3 5:00  | 22.53 | 90.82 | -1    | 0.23 |
| 2019/3/3 6:00  | 22.19 | 92.8  | -1.1  | 0.18 |
| 2019/3/3 7:00  | 21.94 | 93.98 | 34.3  | 0.15 |
| 2019/3/3 8:00  | 23.02 | 90.2  | 227.4 | 0.25 |
| 2019/3/3 9:00  | 24.97 | 80.87 | 473   | 0.52 |
| 2019/3/3 10:00 | 26.75 | 66.51 | 701.3 | 0.97 |
| 2019/3/3 11:00 | 28.51 | 53.09 | 870.5 | 1.44 |
| 2019/3/3 12:00 | 30    | 48.37 | 957.9 | 1.66 |
| 2019/3/3 13:00 | 31.66 | 40.61 | 965.8 | 2.01 |
| 2019/3/3 14:00 | 32.74 | 36.5  | 891.4 | 2.21 |
| 2019/3/3 15:00 | 33.51 | 32.99 | 771.9 | 2.38 |
| 2019/3/3 16:00 | 33.81 | 35.14 | 566   | 2.32 |
| 2019/3/3 17:00 | 27.24 | 81.76 | 327   | 0.54 |
| 2019/3/3 18:00 | 26.63 | 84.37 | 90.7  | 0.45 |
| 2019/3/3 19:00 | 26.43 | 83.94 | 0     | 0.46 |
| 2019/3/3 20:00 | 26.49 | 83.55 | -1.2  | 0.47 |
| 2019/3/3 21:00 | 26.32 | 85.63 | -1    | 0.41 |
| 2019/3/3 22:00 | 26.08 | 87.68 | -1    | 0.35 |
| 2019/3/3 23:00 | 26.02 | 76.97 | -1.1  | 0.65 |
| 2019/3/4 0:00  | 24.86 | 73.65 | -0.7  | 0.72 |
| 2019/3/4 1:00  | 24.45 | 75.15 | -1.1  | 0.67 |
| 2019/3/4 2:00  | 23.96 | 77.98 | -1    | 0.58 |
| 2019/3/4 3:00  | 23.07 | 82.19 | -0.8  | 0.45 |
| 2019/3/4 4:00  | 22.29 | 86.52 | -1    | 0.33 |
| 2019/3/4 5:00  | 21.85 | 89.52 | -1    | 0.25 |

|                |       |       |       |      |
|----------------|-------|-------|-------|------|
| 2019/3/4 6:00  | 21.39 | 91.99 | -1.1  | 0.19 |
| 2019/3/4 7:00  | 21.02 | 93.78 | 39.7  | 0.15 |
| 2019/3/4 8:00  | 22.18 | 90.75 | 218.2 | 0.23 |
| 2019/3/4 9:00  | 24.86 | 80.54 | 458.1 | 0.53 |
| 2019/3/4 10:00 | 27.13 | 68.47 | 685.2 | 0.93 |
| 2019/3/4 11:00 | 28.98 | 57.82 | 847.6 | 1.32 |
| 2019/3/4 12:00 | 28.08 | 68.7  | 940.3 | 0.95 |
| 2019/3/4 13:00 | 25.82 | 84.29 | 946   | 0.44 |
| 2019/3/4 14:00 | 25.58 | 87.39 | 869.4 | 0.35 |
| 2019/3/4 15:00 | 25.87 | 85.61 | 742.8 | 0.41 |
| 2019/3/4 16:00 | 26.02 | 85.39 | 541.7 | 0.41 |
| 2019/3/4 17:00 | 25.65 | 86.81 | 206.8 | 0.37 |
| 2019/3/4 18:00 | 25.42 | 87.16 | 46.9  | 0.36 |
| 2019/3/4 19:00 | 25.38 | 86.99 | 0.1   | 0.36 |
| 2019/3/4 20:00 | 25.43 | 86.86 | -0.6  | 0.37 |
| 2019/3/4 21:00 | 25.49 | 86.48 | -0.9  | 0.38 |
| 2019/3/4 22:00 | 25.61 | 86.1  | -1    | 0.39 |
| 2019/3/4 23:00 | 25.58 | 86.79 | -0.9  | 0.37 |
| 2019/3/5 0:00  | 25.57 | 88.39 | -0.9  | 0.32 |
| 2019/3/5 1:00  | 25.52 | 90.4  | -0.9  | 0.27 |
| 2019/3/5 2:00  | 25.46 | 91.23 | -1    | 0.24 |
| 2019/3/5 3:00  | 24.66 | 92.95 | -0.9  | 0.19 |
| 2019/3/5 4:00  | 23.49 | 92.68 | -0.7  | 0.19 |
| 2019/3/5 5:00  | 22.91 | 90.05 | -0.6  | 0.25 |
| 2019/3/5 6:00  | 22.39 | 91.68 | -0.1  | 0.21 |
| 2019/3/5 7:00  | 22.18 | 91.69 | 11.7  | 0.20 |
| 2019/3/5 8:00  | 22.75 | 90.03 | 135.7 | 0.25 |
| 2019/3/5 9:00  | 24.61 | 84.01 | 381.1 | 0.43 |
| 2019/3/5 10:00 | 26.59 | 74.28 | 651.4 | 0.74 |
| 2019/3/5 11:00 | 27.86 | 65.75 | 703.9 | 1.03 |
| 2019/3/5 12:00 | 26.75 | 76.64 | 826.7 | 0.68 |
| 2019/3/5 13:00 | 26.55 | 79.62 | 925.3 | 0.59 |
| 2019/3/5 14:00 | 26.38 | 81.48 | 858.1 | 0.53 |
| 2019/3/5 15:00 | 26.3  | 83.57 | 742.5 | 0.47 |
| 2019/3/5 16:00 | 26.28 | 84.53 | 446.8 | 0.44 |
| 2019/3/5 17:00 | 26.1  | 84.33 | 237.7 | 0.45 |
| 2019/3/5 18:00 | 25.52 | 88.77 | 57.2  | 0.31 |
| 2019/3/5 19:00 | 25.02 | 91.06 | 0.4   | 0.24 |
| 2019/3/5 20:00 | 25.09 | 89.04 | -0.2  | 0.30 |
| 2019/3/5 21:00 | 25.2  | 86.57 | -0.2  | 0.37 |
| 2019/3/5 22:00 | 25.2  | 84.38 | -0.2  | 0.43 |
| 2019/3/5 23:00 | 24.72 | 87    | 0.7   | 0.35 |

|                |       |       |       |      |
|----------------|-------|-------|-------|------|
| 2019/3/6 0:00  | 24.19 | 90.3  | 0.1   | 0.26 |
| 2019/3/6 1:00  | 23.51 | 93.8  | 0.2   | 0.16 |
| 2019/3/6 2:00  | 23.75 | 90.6  | -0.3  | 0.25 |
| 2019/3/6 3:00  | 23.62 | 90.16 | 0.1   | 0.26 |
| 2019/3/6 4:00  | 23.17 | 91.32 | 0.2   | 0.22 |
| 2019/3/6 5:00  | 23.8  | 88.58 | -0.7  | 0.30 |
| 2019/3/6 6:00  | 24.37 | 83.77 | -0.3  | 0.43 |
| 2019/3/6 7:00  | 23.82 | 88.46 | 9.8   | 0.30 |
| 2019/3/6 8:00  | 24.06 | 86.9  | 30.8  | 0.35 |
| 2019/3/6 9:00  | 23.34 | 89.38 | 37.2  | 0.27 |
| 2019/3/6 10:00 | 23.96 | 85.04 | 123.3 | 0.39 |
| 2019/3/6 11:00 | 24.46 | 80.74 | 287.8 | 0.52 |
| 2019/3/6 12:00 | 24.34 | 80.21 | 291.5 | 0.53 |
| 2019/3/6 13:00 | 24.14 | 78.96 | 261.9 | 0.56 |
| 2019/3/6 14:00 | 24.07 | 77.62 | 304.8 | 0.59 |
| 2019/3/6 15:00 | 24.13 | 75.44 | 546   | 0.65 |
| 2019/3/6 16:00 | 24.08 | 75.89 | 237.6 | 0.64 |
| 2019/3/6 17:00 | 24.05 | 76.28 | 223.2 | 0.63 |
| 2019/3/6 18:00 | 23.95 | 75.63 | 44    | 0.64 |
| 2019/3/6 19:00 | 23.87 | 76.19 | 0.3   | 0.62 |
| 2019/3/6 20:00 | 23.88 | 75.22 | -0.3  | 0.65 |
| 2019/3/6 21:00 | 23.56 | 74.91 | -0.2  | 0.65 |
| 2019/3/6 22:00 | 23.27 | 74.82 | -0.5  | 0.65 |
| 2019/3/6 23:00 | 22.97 | 74.39 | -0.4  | 0.65 |
| 2019/3/7 0:00  | 22.66 | 72.56 | -0.4  | 0.69 |
| 2019/3/7 1:00  | 22.12 | 74.17 | -0.4  | 0.63 |
| 2019/3/7 2:00  | 21.88 | 75.43 | -0.3  | 0.60 |
| 2019/3/7 3:00  | 21.57 | 76.61 | -0.3  | 0.56 |
| 2019/3/7 4:00  | 21.32 | 77.81 | -0.3  | 0.53 |
| 2019/3/7 5:00  | 21.11 | 78.57 | -0.3  | 0.50 |
| 2019/3/7 6:00  | 20.95 | 78.24 | -0.5  | 0.51 |
| 2019/3/7 7:00  | 20.74 | 78.72 | 20.5  | 0.49 |
| 2019/3/7 8:00  | 21.18 | 76.57 | 182.9 | 0.55 |
| 2019/3/7 9:00  | 22.73 | 69.37 | 464.8 | 0.77 |
| 2019/3/7 10:00 | 24.43 | 63.51 | 719   | 0.98 |
| 2019/3/7 11:00 | 24.57 | 67.93 | 862.2 | 0.86 |
| 2019/3/7 12:00 | 24.18 | 73.96 | 955.6 | 0.69 |
| 2019/3/7 13:00 | 24.48 | 74.82 | 979.8 | 0.68 |
| 2019/3/7 14:00 | 24.66 | 75.37 | 898.5 | 0.67 |
| 2019/3/7 15:00 | 24.52 | 76.79 | 458.7 | 0.62 |
| 2019/3/7 16:00 | 24.39 | 77.43 | 416.2 | 0.60 |
| 2019/3/7 17:00 | 24.41 | 78.52 | 260.6 | 0.58 |



|                |       |       |       |      |
|----------------|-------|-------|-------|------|
| 2019/3/7 18:00 | 24.38 | 79.64 | 90.5  | 0.54 |
| 2019/3/7 19:00 | 24.2  | 80.4  | 0.5   | 0.52 |
| 2019/3/7 20:00 | 24.11 | 81.4  | -0.9  | 0.49 |
| 2019/3/7 21:00 | 24.08 | 81.09 | -0.8  | 0.50 |
| 2019/3/7 22:00 | 23.67 | 80.09 | -0.8  | 0.52 |
| 2019/3/7 23:00 | 22.88 | 79.22 | -0.8  | 0.52 |
| 2019/3/8 0:00  | 22.01 | 78.94 | -0.8  | 0.51 |
| 2019/3/8 1:00  | 21.32 | 80.6  | -0.8  | 0.46 |
| 2019/3/8 2:00  | 21.04 | 82.07 | -1    | 0.42 |
| 2019/3/8 3:00  | 20.78 | 83    | -1    | 0.39 |
| 2019/3/8 4:00  | 20.23 | 85    | -0.8  | 0.34 |
| 2019/3/8 5:00  | 19.59 | 86.46 | -0.9  | 0.30 |
| 2019/3/8 6:00  | 19.04 | 89.24 | -1    | 0.23 |
| 2019/3/8 7:00  | 18.82 | 90.28 | 41.5  | 0.20 |
| 2019/3/8 8:00  | 20.34 | 84.81 | 254   | 0.34 |
| 2019/3/8 9:00  | 23.15 | 73.8  | 494.7 | 0.67 |
| 2019/3/8 10:00 | 25.95 | 59.5  | 716.7 | 1.15 |
| 2019/3/8 11:00 | 27.94 | 48.99 | 888.7 | 1.54 |
| 2019/3/8 12:00 | 29.67 | 43.14 | 974.9 | 1.81 |
| 2019/3/8 13:00 | 25.98 | 73.88 | 971.9 | 0.74 |
| 2019/3/8 14:00 | 25.58 | 77.08 | 891.3 | 0.64 |
| 2019/3/8 15:00 | 25.4  | 79.98 | 760.4 | 0.56 |
| 2019/3/8 16:00 | 25.29 | 82.08 | 547.4 | 0.50 |
| 2019/3/8 17:00 | 25.27 | 82.32 | 321.9 | 0.49 |
| 2019/3/8 18:00 | 25.54 | 78.53 | 92.2  | 0.60 |
| 2019/3/8 19:00 | 25.47 | 78.7  | 0.5   | 0.59 |
| 2019/3/8 20:00 | 25.4  | 78.89 | -0.9  | 0.59 |
| 2019/3/8 21:00 | 25.16 | 79.04 | -0.8  | 0.58 |
| 2019/3/8 22:00 | 24.68 | 75.25 | -0.9  | 0.67 |
| 2019/3/8 23:00 | 24.17 | 73.82 | -0.9  | 0.69 |
| 2019/3/9 0:00  | 23.46 | 77.73 | -0.9  | 0.58 |
| 2019/3/9 1:00  | 22.68 | 80.81 | -0.9  | 0.48 |
| 2019/3/9 2:00  | 21.85 | 83.15 | -1    | 0.41 |
| 2019/3/9 3:00  | 21.48 | 84.73 | -1.2  | 0.36 |
| 2019/3/9 4:00  | 21.1  | 85.88 | -1.1  | 0.33 |
| 2019/3/9 5:00  | 20.33 | 88.4  | -1    | 0.26 |
| 2019/3/9 6:00  | 19.75 | 91.06 | -1    | 0.20 |
| 2019/3/9 7:00  | 19.56 | 91.66 | 43.7  | 0.18 |
| 2019/3/9 8:00  | 21.15 | 87.34 | 254.4 | 0.30 |
| 2019/3/9 9:00  | 24.49 | 77.72 | 499.9 | 0.60 |
| 2019/3/9 10:00 | 27.06 | 66.66 | 720.4 | 0.98 |
| 2019/3/9 11:00 | 29.16 | 57.15 | 896.6 | 1.35 |

|                 |       |       |       |      |
|-----------------|-------|-------|-------|------|
| 2019/3/9 12:00  | 30.88 | 48.3  | 982   | 1.71 |
| 2019/3/9 13:00  | 32.24 | 42.11 | 982.6 | 1.99 |
| 2019/3/9 14:00  | 33.24 | 39.19 | 886.9 | 2.15 |
| 2019/3/9 15:00  | 33.78 | 38.51 | 647.7 | 2.20 |
| 2019/3/9 16:00  | 27.67 | 77.67 | 486.2 | 0.67 |
| 2019/3/9 17:00  | 26.1  | 87.96 | 328.3 | 0.34 |
| 2019/3/9 18:00  | 25.96 | 89.52 | 96.7  | 0.30 |
| 2019/3/9 19:00  | 26.01 | 89.08 | 0.5   | 0.31 |
| 2019/3/9 20:00  | 26.13 | 89.1  | -1.2  | 0.31 |
| 2019/3/9 21:00  | 27.28 | 75.82 | -1.7  | 0.72 |
| 2019/3/9 22:00  | 28.38 | 56.92 | -1.2  | 1.32 |
| 2019/3/9 23:00  | 27.93 | 60.39 | -0.7  | 1.20 |
| 2019/3/10 0:00  | 26.93 | 67.52 | -0.7  | 0.95 |
| 2019/3/10 1:00  | 25.92 | 72.41 | -0.8  | 0.78 |
| 2019/3/10 2:00  | 24.92 | 78.43 | -0.8  | 0.59 |
| 2019/3/10 3:00  | 24.12 | 83.03 | -1    | 0.45 |
| 2019/3/10 4:00  | 23.75 | 86.72 | -1    | 0.35 |
| 2019/3/10 5:00  | 23.47 | 89.84 | -1.2  | 0.26 |
| 2019/3/10 6:00  | 23.28 | 91.59 | -1.1  | 0.22 |
| 2019/3/10 7:00  | 23.13 | 92.56 | 44    | 0.19 |
| 2019/3/10 8:00  | 23.76 | 90.71 | 147.7 | 0.24 |
| 2019/3/10 9:00  | 25.33 | 83.14 | 288.6 | 0.47 |
| 2019/3/10 10:00 | 27.44 | 69.22 | 684.1 | 0.92 |
| 2019/3/10 11:00 | 29.41 | 57.88 | 896.2 | 1.33 |
| 2019/3/10 12:00 | 31.23 | 47.94 | 993.3 | 1.74 |
| 2019/3/10 13:00 | 32.37 | 43.87 | 992   | 1.93 |
| 2019/3/10 14:00 | 33.49 | 41.02 | 797.1 | 2.09 |
| 2019/3/10 15:00 | 29.04 | 68.49 | 776.2 | 0.99 |
| 2019/3/10 16:00 | 27.09 | 80.48 | 523.7 | 0.57 |
| 2019/3/10 17:00 | 26.59 | 84.55 | 316.4 | 0.45 |
| 2019/3/10 18:00 | 26.43 | 86.02 | 82.7  | 0.40 |
| 2019/3/10 19:00 | 26.36 | 87.79 | 0.7   | 0.35 |
| 2019/3/10 20:00 | 27.18 | 80    | -1.8  | 0.59 |
| 2019/3/10 21:00 | 29.82 | 51.21 | -1.5  | 1.56 |
| 2019/3/10 22:00 | 28.96 | 54    | -0.7  | 1.44 |
| 2019/3/10 23:00 | 27.62 | 61.06 | -0.7  | 1.17 |
| 2019/3/11 0:00  | 26.5  | 68.73 | -0.9  | 0.90 |
| 2019/3/11 1:00  | 25.69 | 73.41 | -0.9  | 0.75 |
| 2019/3/11 2:00  | 24.72 | 80.08 | -1    | 0.54 |
| 2019/3/11 3:00  | 24.13 | 84.88 | -1.1  | 0.40 |
| 2019/3/11 4:00  | 23.39 | 87.98 | -1    | 0.31 |
| 2019/3/11 5:00  | 22.81 | 91.59 | -1    | 0.21 |

|                 |       |       |       |      |
|-----------------|-------|-------|-------|------|
| 2019/3/11 6:00  | 22.52 | 93.5  | -1.1  | 0.16 |
| 2019/3/11 7:00  | 22.31 | 94.19 | 45.2  | 0.14 |
| 2019/3/11 8:00  | 23.2  | 91.01 | 252.1 | 0.23 |
| 2019/3/11 9:00  | 25.39 | 82.08 | 498.7 | 0.50 |
| 2019/3/11 10:00 | 27.88 | 64.46 | 734.4 | 1.07 |
| 2019/3/11 11:00 | 30.02 | 49.02 | 910.8 | 1.64 |
| 2019/3/11 12:00 | 27.76 | 70.17 | 993.4 | 0.90 |
| 2019/3/11 13:00 | 25.98 | 84.53 | 988.2 | 0.44 |
| 2019/3/11 14:00 | 25.96 | 85.28 | 905.1 | 0.42 |
| 2019/3/11 15:00 | 26.22 | 82.15 | 772.6 | 0.51 |
| 2019/3/11 16:00 | 26.32 | 81.21 | 570.4 | 0.54 |
| 2019/3/11 17:00 | 26.4  | 80.42 | 329.3 | 0.56 |
| 2019/3/11 18:00 | 26.45 | 80.73 | 98.2  | 0.55 |
| 2019/3/11 19:00 | 26.36 | 81.95 | 0.7   | 0.52 |
| 2019/3/11 20:00 | 26.32 | 84.04 | -0.9  | 0.46 |
| 2019/3/11 21:00 | 26.13 | 84.83 | -1    | 0.43 |
| 2019/3/11 22:00 | 25.9  | 83.25 | -1    | 0.47 |
| 2019/3/11 23:00 | 25.58 | 75.92 | -1.3  | 0.67 |
| 2019/3/12 0:00  | 25.76 | 69.07 | -1.1  | 0.87 |
| 2019/3/12 1:00  | 25.33 | 71.92 | -1    | 0.78 |
| 2019/3/12 2:00  | 24.61 | 77.48 | -1.1  | 0.61 |
| 2019/3/12 3:00  | 23.88 | 81.77 | -1    | 0.48 |
| 2019/3/12 4:00  | 23.53 | 86.37 | -1    | 0.35 |
| 2019/3/12 5:00  | 23.06 | 90.04 | -0.9  | 0.25 |
| 2019/3/12 6:00  | 22.42 | 94.42 | -1    | 0.14 |
| 2019/3/12 7:00  | 22.39 | 95.91 | 46.3  | 0.10 |
| 2019/3/12 8:00  | 23.31 | 92.9  | 242.9 | 0.18 |
| 2019/3/12 9:00  | 25.32 | 81.24 | 491.4 | 0.52 |
| 2019/3/12 10:00 | 26.76 | 71.62 | 608.7 | 0.83 |
| 2019/3/12 11:00 | 26.13 | 79.45 | 791.2 | 0.59 |
| 2019/3/12 12:00 | 25.68 | 83.55 | 957.7 | 0.46 |
| 2019/3/12 13:00 | 25.67 | 84    | 977   | 0.45 |
| 2019/3/12 14:00 | 25.79 | 83.52 | 905.6 | 0.46 |
| 2019/3/12 15:00 | 25.91 | 83.66 | 785.5 | 0.46 |
| 2019/3/12 16:00 | 26.01 | 84.61 | 583.4 | 0.44 |
| 2019/3/12 17:00 | 25.91 | 85.16 | 328.8 | 0.42 |
| 2019/3/12 18:00 | 26.23 | 83.79 | 93.8  | 0.46 |
| 2019/3/12 19:00 | 26.4  | 81.65 | 0.6   | 0.53 |
| 2019/3/12 20:00 | 26.23 | 83.93 | -0.9  | 0.46 |
| 2019/3/12 21:00 | 25.86 | 85.23 | -1    | 0.42 |
| 2019/3/12 22:00 | 25.2  | 84.75 | -1.1  | 0.42 |
| 2019/3/12 23:00 | 24.92 | 73.47 | -1.1  | 0.72 |

|                 |       |       |       |      |
|-----------------|-------|-------|-------|------|
| 2019/3/13 0:00  | 24.8  | 68.79 | -1.3  | 0.85 |
| 2019/3/13 1:00  | 24.72 | 72.83 | -1.1  | 0.74 |
| 2019/3/13 2:00  | 24.09 | 78.54 | -1.1  | 0.57 |
| 2019/3/13 3:00  | 23.57 | 83.62 | -1    | 0.42 |
| 2019/3/13 4:00  | 22.94 | 88.55 | -1.1  | 0.29 |
| 2019/3/13 5:00  | 22.41 | 92.26 | -1.1  | 0.19 |
| 2019/3/13 6:00  | 21.97 | 94.64 | -1.2  | 0.13 |
| 2019/3/13 7:00  | 22.56 | 94.49 | 44.8  | 0.14 |
| 2019/3/13 8:00  | 23.89 | 88.25 | 221.7 | 0.31 |
| 2019/3/13 9:00  | 25.85 | 77.12 | 435.3 | 0.65 |
| 2019/3/13 10:00 | 27.73 | 64.14 | 737.5 | 1.08 |
| 2019/3/13 11:00 | 29.54 | 56.17 | 916.4 | 1.39 |
| 2019/3/13 12:00 | 30.75 | 50.64 | 981.5 | 1.63 |
| 2019/3/13 13:00 | 31.93 | 45.3  | 996.9 | 1.86 |
| 2019/3/13 14:00 | 32.93 | 41.27 | 910.2 | 2.05 |
| 2019/3/13 15:00 | 33.86 | 37.48 | 783.5 | 2.24 |
| 2019/3/13 16:00 | 34.46 | 35.38 | 588.6 | 2.35 |
| 2019/3/13 17:00 | 34.72 | 33.59 | 348   | 2.43 |
| 2019/3/13 18:00 | 33.97 | 35.02 | 106.1 | 2.34 |
| 2019/3/13 19:00 | 32.47 | 38    | 0.8   | 2.14 |
| 2019/3/13 20:00 | 31.38 | 41.19 | -1.1  | 1.97 |
| 2019/3/13 21:00 | 30.09 | 47.85 | -0.8  | 1.68 |
| 2019/3/13 22:00 | 28.67 | 56.66 | -0.7  | 1.34 |
| 2019/3/13 23:00 | 27.31 | 64.24 | -0.6  | 1.06 |
| 2019/3/14 0:00  | 26.19 | 70.21 | -0.8  | 0.85 |
| 2019/3/14 1:00  | 25.51 | 75    | -0.8  | 0.70 |
| 2019/3/14 2:00  | 24.99 | 77.64 | -0.9  | 0.61 |
| 2019/3/14 3:00  | 24.67 | 79.04 | -0.9  | 0.57 |
| 2019/3/14 4:00  | 24.42 | 79.78 | -1    | 0.54 |
| 2019/3/14 5:00  | 24.11 | 80.82 | -1    | 0.51 |
| 2019/3/14 6:00  | 23.49 | 83.8  | -0.9  | 0.42 |
| 2019/3/14 7:00  | 23.27 | 84.65 | 51.2  | 0.39 |
| 2019/3/14 8:00  | 24.59 | 79.63 | 235.7 | 0.55 |
| 2019/3/14 9:00  | 26.06 | 72.43 | 440.3 | 0.78 |
| 2019/3/14 10:00 | 27.99 | 59.33 | 725.6 | 1.23 |
| 2019/3/14 11:00 | 29.65 | 49.81 | 913.8 | 1.60 |
| 2019/3/14 12:00 | 31.24 | 45.12 | 991.2 | 1.83 |
| 2019/3/14 13:00 | 32.56 | 41.85 | 991.3 | 2.01 |
| 2019/3/14 14:00 | 33.65 | 38.45 | 912.6 | 2.19 |
| 2019/3/14 15:00 | 34.41 | 36.56 | 756.4 | 2.31 |
| 2019/3/14 16:00 | 27.39 | 77.71 | 488.8 | 0.66 |
| 2019/3/14 17:00 | 26.54 | 83.36 | 332.1 | 0.48 |

|                 |       |       |       |      |
|-----------------|-------|-------|-------|------|
| 2019/3/14 18:00 | 26.56 | 84.51 | 106.4 | 0.45 |
| 2019/3/14 19:00 | 26.23 | 87.07 | 0.9   | 0.37 |
| 2019/3/14 20:00 | 26.26 | 88.9  | -1.2  | 0.32 |
| 2019/3/14 21:00 | 28.16 | 63.22 | -2.1  | 1.12 |
| 2019/3/14 22:00 | 29.06 | 49.59 | -0.9  | 1.58 |
| 2019/3/14 23:00 | 27.86 | 55.29 | -0.6  | 1.35 |
| 2019/3/15 0:00  | 26.51 | 64.39 | -0.6  | 1.03 |
| 2019/3/15 1:00  | 25.34 | 72.43 | -0.9  | 0.76 |
| 2019/3/15 2:00  | 24.65 | 78.16 | -1    | 0.59 |
| 2019/3/15 3:00  | 23.89 | 81.91 | -0.9  | 0.47 |
| 2019/3/15 4:00  | 23.48 | 84.81 | -1.1  | 0.39 |
| 2019/3/15 5:00  | 22.83 | 87.67 | -0.9  | 0.31 |
| 2019/3/15 6:00  | 22.45 | 89    | -1    | 0.27 |
| 2019/3/15 7:00  | 22.32 | 89.63 | 52.9  | 0.26 |
| 2019/3/15 8:00  | 23.33 | 85.64 | 256.8 | 0.37 |
| 2019/3/15 9:00  | 25.87 | 74.12 | 484.1 | 0.73 |
| 2019/3/15 10:00 | 28.03 | 63.63 | 736.2 | 1.10 |
| 2019/3/15 11:00 | 29.5  | 56.49 | 923.8 | 1.38 |
| 2019/3/15 12:00 | 31.04 | 49.01 | 954.8 | 1.69 |
| 2019/3/15 13:00 | 32.28 | 42.52 | 923.2 | 1.98 |
| 2019/3/15 14:00 | 28.21 | 73.08 | 793.9 | 0.82 |
| 2019/3/15 15:00 | 26.23 | 84.03 | 829.6 | 0.46 |
| 2019/3/15 16:00 | 25.66 | 87.34 | 555   | 0.35 |
| 2019/3/15 17:00 | 25.6  | 86.97 | 318.9 | 0.36 |
| 2019/3/15 18:00 | 25.74 | 86.72 | 97.3  | 0.37 |
| 2019/3/15 19:00 | 25.72 | 86.73 | 1.1   | 0.37 |
| 2019/3/15 20:00 | 25.92 | 84.75 | -0.8  | 0.43 |
| 2019/3/15 21:00 | 26.07 | 83.55 | -0.5  | 0.47 |
| 2019/3/15 22:00 | 25.98 | 86.45 | -0.6  | 0.38 |
| 2019/3/15 23:00 | 25.38 | 88.26 | -0.9  | 0.33 |
| 2019/3/16 0:00  | 24.64 | 84.7  | -1    | 0.41 |
| 2019/3/16 1:00  | 24.42 | 76.23 | -0.9  | 0.64 |
| 2019/3/16 2:00  | 24.06 | 76.15 | -0.9  | 0.63 |
| 2019/3/16 3:00  | 23.9  | 79.74 | -0.7  | 0.53 |
| 2019/3/16 4:00  | 23.53 | 82.59 | -0.7  | 0.45 |
| 2019/3/16 5:00  | 22.9  | 85.97 | -0.8  | 0.35 |
| 2019/3/16 6:00  | 22.33 | 89.43 | -1    | 0.26 |
| 2019/3/16 7:00  | 22.47 | 89.73 | 59.9  | 0.25 |
| 2019/3/16 8:00  | 23.66 | 86.36 | 238.6 | 0.35 |
| 2019/3/16 9:00  | 25.9  | 76.07 | 491.6 | 0.68 |
| 2019/3/16 10:00 | 28.18 | 62.68 | 723.2 | 1.14 |
| 2019/3/16 11:00 | 29.26 | 56.47 | 906.9 | 1.37 |

|                 |       |       |       |      |
|-----------------|-------|-------|-------|------|
| 2019/3/16 12:00 | 26.15 | 84.39 | 978.4 | 0.44 |
| 2019/3/16 13:00 | 25.91 | 85.93 | 983.9 | 0.40 |
| 2019/3/16 14:00 | 25.62 | 87.23 | 908   | 0.36 |
| 2019/3/16 15:00 | 25.51 | 86.33 | 749.8 | 0.38 |
| 2019/3/16 16:00 | 25.35 | 87.27 | 517.3 | 0.35 |
| 2019/3/16 17:00 | 25.32 | 85.84 | 317.3 | 0.39 |
| 2019/3/16 18:00 | 25.57 | 80.89 | 96.1  | 0.53 |
| 2019/3/16 19:00 | 25.55 | 81.58 | 0.3   | 0.51 |
| 2019/3/16 20:00 | 25.44 | 81.36 | -1    | 0.52 |
| 2019/3/16 21:00 | 25.56 | 79.19 | -1.1  | 0.58 |
| 2019/3/16 22:00 | 25.72 | 78.16 | -1    | 0.61 |
| 2019/3/16 23:00 | 25.55 | 83.85 | -0.5  | 0.45 |
| 2019/3/17 0:00  | 25.51 | 85.82 | -0.5  | 0.40 |
| 2019/3/17 1:00  | 25.49 | 87.85 | -0.6  | 0.34 |
| 2019/3/17 2:00  | 25.02 | 84.4  | -0.7  | 0.43 |
| 2019/3/17 3:00  | 24.45 | 82.22 | -0.5  | 0.48 |
| 2019/3/17 4:00  | 23.7  | 84.54 | -0.5  | 0.40 |
| 2019/3/17 5:00  | 23.11 | 86.9  | -1    | 0.33 |
| 2019/3/17 6:00  | 22.86 | 88.19 | -0.6  | 0.30 |
| 2019/3/17 7:00  | 22.67 | 89.52 | 22.3  | 0.26 |
| 2019/3/17 8:00  | 23.14 | 88.4  | 153.9 | 0.30 |
| 2019/3/17 9:00  | 25.23 | 79.1  | 348.6 | 0.58 |
| 2019/3/17 10:00 | 27.96 | 60.22 | 734.2 | 1.20 |
| 2019/3/17 11:00 | 29.74 | 48.75 | 922.6 | 1.64 |
| 2019/3/17 12:00 | 30.52 | 48.04 | 811.9 | 1.70 |
| 2019/3/17 13:00 | 25.91 | 85.21 | 627.4 | 0.42 |
| 2019/3/17 14:00 | 25.73 | 84.38 | 875.3 | 0.44 |
| 2019/3/17 15:00 | 25.78 | 82.88 | 777.6 | 0.48 |
| 2019/3/17 16:00 | 25.79 | 80.76 | 571.8 | 0.54 |
| 2019/3/17 17:00 | 25.98 | 76.25 | 294.1 | 0.67 |
| 2019/3/17 18:00 | 25.86 | 75.41 | 36.6  | 0.69 |
| 2019/3/17 19:00 | 25.76 | 76.15 | 0.1   | 0.67 |
| 2019/3/17 20:00 | 25.47 | 82.17 | -0.7  | 0.50 |
| 2019/3/17 21:00 | 25.54 | 82.54 | -0.7  | 0.49 |
| 2019/3/17 22:00 | 25.59 | 83.1  | -0.5  | 0.47 |
| 2019/3/17 23:00 | 25.61 | 83.34 | -0.6  | 0.47 |
| 2019/3/18 0:00  | 25.61 | 81.85 | -0.6  | 0.51 |
| 2019/3/18 1:00  | 25.72 | 78.75 | -0.4  | 0.60 |
| 2019/3/18 2:00  | 25.51 | 82.94 | -0.4  | 0.48 |
| 2019/3/18 3:00  | 25.33 | 86.03 | -0.3  | 0.39 |
| 2019/3/18 4:00  | 24.92 | 83.62 | -0.3  | 0.45 |
| 2019/3/18 5:00  | 24.28 | 84.76 | -0.3  | 0.41 |

|                 |       |       |       |      |
|-----------------|-------|-------|-------|------|
| 2019/3/18 6:00  | 23.7  | 85.96 | -0.2  | 0.37 |
| 2019/3/18 7:00  | 23.22 | 88.62 | 11.7  | 0.29 |
| 2019/3/18 8:00  | 23.31 | 87.71 | 105.6 | 0.32 |
| 2019/3/18 9:00  | 24.18 | 83.58 | 283.6 | 0.44 |
| 2019/3/18 10:00 | 25.03 | 81.13 | 224.3 | 0.52 |
| 2019/3/18 11:00 | 25.69 | 77.46 | 202.2 | 0.63 |
| 2019/3/18 12:00 | 25.79 | 77.2  | 212.1 | 0.64 |
| 2019/3/18 13:00 | 26.34 | 73.77 | 420.7 | 0.75 |
| 2019/3/18 14:00 | 26.46 | 73.93 | 490.1 | 0.75 |
| 2019/3/18 15:00 | 26.33 | 75.35 | 272   | 0.71 |
| 2019/3/18 16:00 | 26.03 | 73.18 | 125.6 | 0.76 |
| 2019/3/18 17:00 | 25.84 | 72.65 | 81    | 0.77 |
| 2019/3/18 18:00 | 25.64 | 77.53 | 40.5  | 0.63 |
| 2019/3/18 19:00 | 25.58 | 79.95 | 0.4   | 0.56 |
| 2019/3/18 20:00 | 25.27 | 81.6  | -0.3  | 0.51 |
| 2019/3/18 21:00 | 24.68 | 84.96 | -0.5  | 0.41 |
| 2019/3/18 22:00 | 23.39 | 90.34 | -0.4  | 0.25 |
| 2019/3/18 23:00 | 24.31 | 86.79 | 0.7   | 0.35 |
| 2019/3/19 0:00  | 24.21 | 89.69 | -0.3  | 0.27 |
| 2019/3/19 1:00  | 24.2  | 86.4  | -0.4  | 0.36 |
| 2019/3/19 2:00  | 24.38 | 85.66 | -0.4  | 0.38 |
| 2019/3/19 3:00  | 24.09 | 87.67 | 0.1   | 0.33 |
| 2019/3/19 4:00  | 23.52 | 87.79 | -0.5  | 0.32 |
| 2019/3/19 5:00  | 23.73 | 86.68 | -0.2  | 0.35 |
| 2019/3/19 6:00  | 23.56 | 83.76 | -0.2  | 0.42 |
| 2019/3/19 7:00  | 23.6  | 78.69 | 18.6  | 0.55 |
| 2019/3/19 8:00  | 23.32 | 78.23 | 72.2  | 0.56 |
| 2019/3/19 9:00  | 23.6  | 75.94 | 175   | 0.62 |
| 2019/3/19 10:00 | 24.28 | 75.42 | 499.9 | 0.65 |
| 2019/3/19 11:00 | 24.55 | 76.91 | 514.9 | 0.62 |
| 2019/3/19 12:00 | 24.84 | 75.57 | 377.2 | 0.66 |
| 2019/3/19 13:00 | 24.94 | 75.24 | 725.8 | 0.68 |
| 2019/3/19 14:00 | 24.75 | 75.89 | 520.1 | 0.65 |
| 2019/3/19 15:00 | 24.71 | 74.3  | 465.6 | 0.70 |
| 2019/3/19 16:00 | 24.81 | 73.88 | 490.8 | 0.71 |
| 2019/3/19 17:00 | 24.85 | 71.03 | 207.3 | 0.79 |
| 2019/3/19 18:00 | 24.83 | 69.22 | 58.8  | 0.84 |
| 2019/3/19 19:00 | 24.61 | 74.56 | 1.4   | 0.69 |
| 2019/3/19 20:00 | 24.26 | 75.7  | -0.7  | 0.65 |
| 2019/3/19 21:00 | 24.1  | 73.82 | -0.9  | 0.69 |
| 2019/3/19 22:00 | 24.01 | 74.97 | -0.9  | 0.66 |
| 2019/3/19 23:00 | 23.91 | 77.03 | -0.7  | 0.60 |

|                 |       |       |        |      |
|-----------------|-------|-------|--------|------|
| 2019/3/20 0:00  | 23.88 | 76.81 | -0.8   | 0.61 |
| 2019/3/20 1:00  | 24.01 | 77.32 | -0.8   | 0.60 |
| 2019/3/20 2:00  | 23.98 | 76.48 | -1     | 0.62 |
| 2019/3/20 3:00  | 23.86 | 76.38 | -1     | 0.62 |
| 2019/3/20 4:00  | 23.94 | 76.83 | -0.9   | 0.61 |
| 2019/3/20 5:00  | 24.05 | 77.08 | -1     | 0.61 |
| 2019/3/20 6:00  | 24.12 | 76.48 | -0.8   | 0.62 |
| 2019/3/20 7:00  | 24.21 | 75.84 | 47.4   | 0.64 |
| 2019/3/20 8:00  | 24.41 | 75.03 | 268.1  | 0.67 |
| 2019/3/20 9:00  | 24.49 | 74.91 | 519.8  | 0.67 |
| 2019/3/20 10:00 | 24.58 | 75.45 | 673    | 0.66 |
| 2019/3/20 11:00 | 24.76 | 74.75 | 921.4  | 0.68 |
| 2019/3/20 12:00 | 24.75 | 75.81 | 943.1  | 0.66 |
| 2019/3/20 13:00 | 24.69 | 75.53 | 1012.6 | 0.66 |
| 2019/3/20 14:00 | 24.66 | 74.79 | 922.2  | 0.68 |
| 2019/3/20 15:00 | 24.69 | 74.22 | 796.4  | 0.70 |
| 2019/3/20 16:00 | 24.52 | 74.65 | 561.1  | 0.68 |
| 2019/3/20 17:00 | 24.4  | 73.87 | 283.4  | 0.70 |
| 2019/3/20 18:00 | 24.28 | 73.27 | 82.5   | 0.71 |
| 2019/3/20 19:00 | 24.26 | 72.32 | 1      | 0.74 |
| 2019/3/20 20:00 | 24.21 | 74.82 | -0.8   | 0.67 |
| 2019/3/20 21:00 | 24.16 | 73.57 | -0.8   | 0.70 |
| 2019/3/20 22:00 | 24.11 | 72.37 | -0.9   | 0.73 |
| 2019/3/20 23:00 | 24.08 | 72    | -0.9   | 0.74 |
| 2019/3/21 0:00  | 24    | 71.82 | -1.1   | 0.74 |
| 2019/3/21 1:00  | 23.96 | 70.98 | -1     | 0.76 |
| 2019/3/21 2:00  | 23.92 | 71.7  | -0.8   | 0.74 |
| 2019/3/21 3:00  | 23.83 | 72.41 | -1.1   | 0.72 |
| 2019/3/21 4:00  | 23.79 | 72.19 | -1.1   | 0.73 |
| 2019/3/21 5:00  | 23.77 | 70.37 | -1.1   | 0.77 |
| 2019/3/21 6:00  | 23.83 | 68.45 | -0.9   | 0.83 |
| 2019/3/21 7:00  | 23.83 | 70.99 | 67.7   | 0.76 |
| 2019/3/21 8:00  | 23.84 | 70.98 | 268    | 0.76 |
| 2019/3/21 9:00  | 23.9  | 69.06 | 456.6  | 0.81 |
| 2019/3/21 10:00 | 24    | 66.43 | 728.6  | 0.89 |
| 2019/3/21 11:00 | 23.98 | 67.25 | 791.9  | 0.86 |
| 2019/3/21 12:00 | 23.82 | 67.23 | 972.6  | 0.86 |
| 2019/3/21 13:00 | 23.82 | 65.62 | 1006.6 | 0.90 |
| 2019/3/21 14:00 | 23.74 | 65.69 | 933.5  | 0.90 |
| 2019/3/21 15:00 | 23.63 | 64.62 | 672.1  | 0.92 |
| 2019/3/21 16:00 | 23.57 | 63.25 | 599.9  | 0.95 |
| 2019/3/21 17:00 | 23.53 | 63.86 | 358.1  | 0.94 |



|                 |       |       |        |      |
|-----------------|-------|-------|--------|------|
| 2019/3/21 18:00 | 23.33 | 65.62 | 111.6  | 0.88 |
| 2019/3/21 19:00 | 23.22 | 64.49 | 1.2    | 0.91 |
| 2019/3/21 20:00 | 23.21 | 66.25 | -1.2   | 0.86 |
| 2019/3/21 21:00 | 23.15 | 64.43 | -1.2   | 0.91 |
| 2019/3/21 22:00 | 23.07 | 65.92 | -1.1   | 0.87 |
| 2019/3/21 23:00 | 23.05 | 65.69 | -1.2   | 0.87 |
| 2019/3/22 0:00  | 22.99 | 65.03 | -1.1   | 0.89 |
| 2019/3/22 1:00  | 22.97 | 63.58 | -1.2   | 0.92 |
| 2019/3/22 2:00  | 22.98 | 62.91 | -1.2   | 0.94 |
| 2019/3/22 3:00  | 22.97 | 63.3  | -1.2   | 0.93 |
| 2019/3/22 4:00  | 22.88 | 64.15 | -1.2   | 0.90 |
| 2019/3/22 5:00  | 21.54 | 69.56 | 0.2    | 0.73 |
| 2019/3/22 6:00  | 18.44 | 80.49 | -0.6   | 0.40 |
| 2019/3/22 7:00  | 17.2  | 87.21 | 88.2   | 0.25 |
| 2019/3/22 8:00  | 18.7  | 80.92 | 298    | 0.40 |
| 2019/3/22 9:00  | 21.71 | 69.72 | 552.7  | 0.73 |
| 2019/3/22 10:00 | 22.89 | 65.5  | 774.4  | 0.87 |
| 2019/3/22 11:00 | 23.23 | 61.68 | 936.2  | 0.98 |
| 2019/3/22 12:00 | 23.11 | 62.52 | 1022.2 | 0.95 |
| 2019/3/22 13:00 | 23.07 | 60.82 | 1032.2 | 1.00 |
| 2019/3/22 14:00 | 23.06 | 62.16 | 954.4  | 0.96 |
| 2019/3/22 15:00 | 23.03 | 61.89 | 823.7  | 0.97 |
| 2019/3/22 16:00 | 23.1  | 63.07 | 620.9  | 0.94 |
| 2019/3/22 17:00 | 23.2  | 61.91 | 371.1  | 0.97 |
| 2019/3/22 18:00 | 23.24 | 62.92 | 121.1  | 0.95 |
| 2019/3/22 19:00 | 23.1  | 63.63 | 1.5    | 0.93 |
| 2019/3/22 20:00 | 23.2  | 63.88 | -1.4   | 0.92 |
| 2019/3/22 21:00 | 23.28 | 64.54 | -1.4   | 0.91 |
| 2019/3/22 22:00 | 23.02 | 65.56 | -1.1   | 0.87 |
| 2019/3/22 23:00 | 22.07 | 68.21 | -1.1   | 0.78 |
| 2019/3/23 0:00  | 20.36 | 75.03 | -0.9   | 0.57 |
| 2019/3/23 1:00  | 19.36 | 75.46 | -1.1   | 0.53 |
| 2019/3/23 2:00  | 19.46 | 72.58 | -1.5   | 0.60 |
| 2019/3/23 3:00  | 19.14 | 74.06 | -1.1   | 0.56 |
| 2019/3/23 4:00  | 18.82 | 75.08 | -1     | 0.53 |
| 2019/3/23 5:00  | 18.63 | 75.2  | -0.9   | 0.52 |
| 2019/3/23 6:00  | 18.69 | 74.77 | -0.7   | 0.53 |
| 2019/3/23 7:00  | 19.28 | 71.56 | 48.2   | 0.61 |
| 2019/3/23 8:00  | 20.55 | 66.69 | 312.6  | 0.76 |
| 2019/3/23 9:00  | 22.86 | 59.13 | 527    | 1.03 |
| 2019/3/23 10:00 | 24.89 | 55.51 | 702.3  | 1.21 |
| 2019/3/23 11:00 | 24.18 | 61.76 | 832.3  | 1.02 |

|                 |       |       |        |      |
|-----------------|-------|-------|--------|------|
| 2019/3/23 12:00 | 24.29 | 62.01 | 953.4  | 1.01 |
| 2019/3/23 13:00 | 24.36 | 62.42 | 1003.7 | 1.00 |
| 2019/3/23 14:00 | 24.42 | 64.32 | 965    | 0.96 |
| 2019/3/23 15:00 | 24.22 | 69.28 | 834.1  | 0.82 |
| 2019/3/23 16:00 | 24.17 | 69.7  | 633.8  | 0.80 |
| 2019/3/23 17:00 | 24.2  | 68.63 | 357.3  | 0.83 |
| 2019/3/23 18:00 | 24.18 | 69.95 | 142.1  | 0.80 |
| 2019/3/23 19:00 | 23.96 | 71.66 | 1.3    | 0.75 |
| 2019/3/23 20:00 | 23.67 | 72.4  | -1     | 0.72 |
| 2019/3/23 21:00 | 23.14 | 71.38 | -1     | 0.73 |
| 2019/3/23 22:00 | 22.26 | 72.44 | -0.9   | 0.68 |
| 2019/3/23 23:00 | 21.61 | 70.29 | -1.1   | 0.71 |
| 2019/3/24 0:00  | 21.29 | 66.15 | -1.1   | 0.80 |
| 2019/3/24 1:00  | 20.91 | 67.22 | -1     | 0.76 |
| 2019/3/24 2:00  | 20.48 | 68.96 | -1     | 0.71 |
| 2019/3/24 3:00  | 19.74 | 72.04 | -0.8   | 0.62 |
| 2019/3/24 4:00  | 19.66 | 70.94 | -1.5   | 0.64 |
| 2019/3/24 5:00  | 20.08 | 68.9  | -1     | 0.70 |
| 2019/3/24 6:00  | 19.66 | 69.99 | -0.6   | 0.66 |
| 2019/3/24 7:00  | 19.8  | 71.66 | 77.4   | 0.63 |
| 2019/3/24 8:00  | 20.5  | 72.46 | 300.2  | 0.63 |
| 2019/3/24 9:00  | 22.92 | 63.78 | 545.1  | 0.92 |
| 2019/3/24 10:00 | 24.92 | 55.6  | 766.8  | 1.21 |
| 2019/3/24 11:00 | 24.24 | 62.16 | 931.7  | 1.01 |
| 2019/3/24 12:00 | 24.22 | 62.95 | 1012.8 | 0.98 |
| 2019/3/24 13:00 | 24.28 | 64.16 | 1018.6 | 0.95 |
| 2019/3/24 14:00 | 24.29 | 66.55 | 943.5  | 0.89 |
| 2019/3/24 15:00 | 24.31 | 68.3  | 814.5  | 0.85 |
| 2019/3/24 16:00 | 24.4  | 68.34 | 612.2  | 0.85 |
| 2019/3/24 17:00 | 24.39 | 66.31 | 367.2  | 0.90 |
| 2019/3/24 18:00 | 24.08 | 67.47 | 123    | 0.86 |
| 2019/3/24 19:00 | 23.85 | 68.11 | 1.6    | 0.84 |
| 2019/3/24 20:00 | 23.93 | 72.28 | -1.3   | 0.73 |
| 2019/3/24 21:00 | 24.02 | 76.96 | -1.2   | 0.61 |
| 2019/3/24 22:00 | 24.13 | 80.33 | -0.7   | 0.52 |
| 2019/3/24 23:00 | 24.16 | 83.09 | -1.1   | 0.45 |
| 2019/3/25 0:00  | 23.79 | 84.77 | -1     | 0.40 |
| 2019/3/25 1:00  | 23.53 | 86.48 | -1.2   | 0.35 |
| 2019/3/25 2:00  | 23.11 | 88.03 | -1     | 0.30 |
| 2019/3/25 3:00  | 22.98 | 89.19 | -1.3   | 0.27 |
| 2019/3/25 4:00  | 22.6  | 89.02 | -1     | 0.27 |
| 2019/3/25 5:00  | 22.22 | 90.9  | -1.1   | 0.22 |

|                 |       |       |        |      |     |
|-----------------|-------|-------|--------|------|-----|
| 2019/3/25 6:00  | 21.9  | 93.56 | -0.7   | 0.16 |     |
| 2019/3/25 7:00  | 22.01 | 94.05 | 83.3   | 0.14 |     |
| 2019/3/25 8:00  | 23.34 | 88.21 | 296.8  | 0.30 |     |
| 2019/3/25 9:00  | 24.68 | 80.08 | 570.7  | 0.54 |     |
| 2019/3/25 10:00 | 25.8  | 73.91 | 759.5  | 0.73 |     |
| 2019/3/25 11:00 | 24.96 | 80.74 | 940.4  | 0.53 |     |
| 2019/3/25 12:00 | 25.05 | 81.03 | 1021.7 | 0.52 |     |
| 2019/3/25 13:00 | 24.95 | 84.66 | 1027.1 | 0.42 |     |
| 2019/3/25 14:00 | 25.02 | 85.71 | 950.1  | 0.39 |     |
| 2019/3/25 15:00 | 25.04 | 85.91 | 819.1  | 0.39 |     |
| 2019/3/25 16:00 | 25.06 | 85.77 | 617.8  | 0.39 |     |
| 2019/3/25 17:00 | 25.12 | 85.04 | 372.1  | 0.41 |     |
| 2019/3/25 18:00 | 25.02 | 86.65 | 114.7  | 0.37 |     |
| 2019/3/25 19:00 | 24.88 | 86.38 | 1.6    | 0.37 |     |
| 2019/3/25 20:00 | 25    | 85.69 | -0.8   | 0.39 |     |
| 2019/3/25 21:00 | 25.08 | 84.67 | -0.9   | 0.42 |     |
| 2019/3/25 22:00 | 25.05 | 85.05 | -0.9   | 0.41 |     |
| 2019/3/25 23:00 | 25.02 | 85.87 | -0.7   | 0.39 |     |
| 2019/3/26 0:00  | 24.96 | 85.54 | -0.9   | 0.40 |     |
| 2019/3/26 1:00  | 24.87 | 86.1  | -0.8   | 0.38 |     |
| 2019/3/26 2:00  | 24.73 | 87.29 | -0.8   | 0.34 |     |
| 2019/3/26 3:00  | 24.71 | 88.62 | -0.7   | 0.31 |     |
| 2019/3/26 4:00  | 24.65 | 89.01 | -0.5   | 0.30 |     |
| 2019/3/26 5:00  | 24.07 | 89.33 | -1     | 0.28 |     |
| 2019/3/26 6:00  | 23.12 | 91.59 | -0.4   | 0.21 |     |
| 2019/3/26 7:00  | 23.13 | 89.79 | 86.4   | 0.26 |     |
| 2019/3/26 8:00  | 24.09 | 87.64 | 305.4  | 0.33 |     |
| 2019/3/26 9:00  | 24.68 | 85.52 | 545.4  | 0.39 |     |
| 2019/3/26 10:00 | 24.9  | 81.61 | 772.8  | 0.50 |     |
| 2019/3/26 11:00 | 25.01 | 80.94 | 944.2  | 0.52 |     |
| 2019/3/26 12:00 | 25.02 | 81.64 | 1027   | 0.50 | 5.3 |
| 2019/3/26 13:00 | 24.95 | 81.81 | 1026.5 | 0.50 | 5.3 |
| 2019/3/26 14:00 | 25.05 | 80.93 | 956.6  | 0.52 | 5.2 |
| 2019/3/26 15:00 | 25.1  | 81.99 | 817.9  | 0.49 | 5.2 |
| 2019/3/26 16:00 | 25.14 | 81.64 | 598.8  | 0.50 | 5.2 |
| 2019/3/26 17:00 | 25.16 | 80.88 | 357.9  | 0.53 | 5.2 |
| 2019/3/26 18:00 | 25    | 81.04 | 119    | 0.52 | 5.2 |
| 2019/3/26 19:00 | 24.75 | 81.85 | 1.6    | 0.49 | 5.1 |
| 2019/3/26 20:00 | 24.67 | 80.69 | -0.9   | 0.52 | 5.1 |
| 2019/3/26 21:00 | 24.55 | 79.87 | -0.8   | 0.54 | 5.1 |
| 2019/3/26 22:00 | 24.35 | 79.73 | -0.8   | 0.54 | 5.1 |
| 2019/3/26 23:00 | 24.22 | 78.92 | -0.7   | 0.56 | 5.1 |

---

|                 |       |       |        |      |     |
|-----------------|-------|-------|--------|------|-----|
| 2019/3/27 0:00  | 24.2  | 78.22 | -0.7   | 0.58 | 5   |
| 2019/3/27 1:00  | 24.11 | 77.57 | -0.7   | 0.59 | 5   |
| 2019/3/27 2:00  | 24.11 | 76.29 | -0.7   | 0.63 | 5   |
| 2019/3/27 3:00  | 23.98 | 76.4  | -0.8   | 0.62 | 5   |
| 2019/3/27 4:00  | 23.96 | 74.32 | -0.9   | 0.68 | 5   |
| 2019/3/27 5:00  | 23.95 | 72.49 | -1     | 0.72 | 5   |
| 2019/3/27 6:00  | 23.95 | 71.98 | -0.6   | 0.74 | 5   |
| 2019/3/27 7:00  | 23.83 | 75.5  | 60.8   | 0.64 | 5   |
| 2019/3/27 8:00  | 23.92 | 73.28 | 285.6  | 0.70 | 5   |
| 2019/3/27 9:00  | 23.91 | 72.05 | 517.3  | 0.73 | 5   |
| 2019/3/27 10:00 | 23.77 | 70.76 | 496.4  | 0.76 | 5   |
| 2019/3/27 11:00 | 23.72 | 68.09 | 699.1  | 0.83 | 5   |
| 2019/3/27 12:00 | 23.73 | 64.47 | 1016.5 | 0.93 | 5.1 |
| 2019/3/27 13:00 | 23.74 | 62.88 | 1037.1 | 0.97 | 5.1 |
| 2019/3/27 14:00 | 23.49 | 62.95 | 951.3  | 0.96 | 5.1 |
| 2019/3/27 15:00 | 23.43 | 61.48 | 828.6  | 0.99 | 5.1 |
| 2019/3/27 16:00 | 23.42 | 61.55 | 591.1  | 0.99 | 5.1 |
| 2019/3/27 17:00 | 23.39 | 60.74 | 314.7  | 1.01 | 5   |
| 2019/3/27 18:00 | 23.27 | 59.3  | 110.6  | 1.04 | 5   |
| 2019/3/27 19:00 | 23.14 | 60.61 | 2.2    | 1.00 | 5   |
| 2019/3/27 20:00 | 23.13 | 58.11 | -1.4   | 1.07 | 5   |
| 2019/3/27 21:00 | 23.09 | 59.73 | -1.3   | 1.02 | 4.9 |
| 2019/3/27 22:00 | 23.09 | 59.53 | -1.2   | 1.03 | 4.9 |
| 2019/3/27 23:00 | 23.07 | 58.16 | -1.3   | 1.06 | 4.9 |
| 2019/3/28 0:00  | 23.02 | 60.16 | -1.3   | 1.01 | 4.9 |
| 2019/3/28 1:00  | 22.99 | 61.95 | -1.2   | 0.96 | 4.8 |
| 2019/3/28 2:00  | 22.91 | 63.44 | -1.1   | 0.92 | 4.8 |
| 2019/3/28 3:00  | 23.04 | 63.75 | -1.2   | 0.92 | 4.8 |
| 2019/3/28 4:00  | 23.06 | 61.02 | -1.1   | 0.99 | 4.8 |
| 2019/3/28 5:00  | 22.33 | 63.82 | -0.5   | 0.89 | 4.8 |
| 2019/3/28 6:00  | 20.19 | 69.66 | 0.4    | 0.68 | 4.8 |
| 2019/3/28 7:00  | 18.59 | 75.06 | 98     | 0.52 | 4.8 |
| 2019/3/28 8:00  | 20.6  | 67.58 | 321.5  | 0.74 | 4.8 |
| 2019/3/28 9:00  | 23.1  | 55.85 | 579.6  | 1.12 | 4.8 |
| 2019/3/28 10:00 | 23.74 | 52.88 | 813.3  | 1.23 | 4.8 |
| 2019/3/28 11:00 | 23.88 | 56.75 | 970.4  | 1.14 | 4.9 |
| 2019/3/28 12:00 | 23.83 | 61.87 | 1042.9 | 1.00 | 4.9 |
| 2019/3/28 13:00 | 23.83 | 63.69 | 1045.3 | 0.95 | 5   |
| 2019/3/28 14:00 | 23.86 | 65.73 | 971.9  | 0.90 | 5   |
| 2019/3/28 15:00 | 24.04 | 64.8  | 827.4  | 0.93 | 5   |
| 2019/3/28 16:00 | 24.24 | 60.26 | 624.1  | 1.06 | 5   |
| 2019/3/28 17:00 | 24.26 | 59.43 | 376.6  | 1.08 | 5   |

---

|                 |       |       |        |      |     |
|-----------------|-------|-------|--------|------|-----|
| 2019/3/28 18:00 | 24.16 | 62.42 | 124.6  | 1.00 | 4.9 |
| 2019/3/28 19:00 | 24.02 | 64.63 | 2.2    | 0.93 | 4.9 |
| 2019/3/28 20:00 | 24.11 | 65.85 | -1.1   | 0.90 | 4.9 |
| 2019/3/28 21:00 | 24.14 | 65.5  | -1.1   | 0.91 | 4.8 |
| 2019/3/28 22:00 | 23.58 | 67.12 | -0.9   | 0.85 | 4.8 |
| 2019/3/28 23:00 | 22.41 | 72.55 | -0.9   | 0.68 | 4.8 |
| 2019/3/29 0:00  | 21.81 | 74.81 | -1     | 0.61 | 4.8 |
| 2019/3/29 1:00  | 21.07 | 76.48 | -0.9   | 0.55 | 4.8 |
| 2019/3/29 2:00  | 20.23 | 78.63 | -1     | 0.48 | 4.8 |
| 2019/3/29 3:00  | 19.97 | 79.02 | -1.1   | 0.47 | 4.7 |
| 2019/3/29 4:00  | 19.46 | 80.35 | -1.1   | 0.43 | 4.7 |
| 2019/3/29 5:00  | 19.45 | 80.41 | -1.2   | 0.43 | 4.7 |
| 2019/3/29 6:00  | 19.09 | 81.68 | -0.1   | 0.39 | 4.7 |
| 2019/3/29 7:00  | 19.1  | 80.7  | 91.6   | 0.41 | 4.7 |
| 2019/3/29 8:00  | 20.68 | 70.9  | 313    | 0.67 | 4.7 |
| 2019/3/29 9:00  | 23.84 | 56.12 | 562.8  | 1.15 | 4.7 |
| 2019/3/29 10:00 | 26.02 | 46.74 | 795.7  | 1.51 | 4.8 |
| 2019/3/29 11:00 | 27.47 | 40.51 | 956.1  | 1.77 | 4.8 |
| 2019/3/29 12:00 | 26.78 | 51.48 | 1034.9 | 1.41 | 4.9 |
| 2019/3/29 13:00 | 25.1  | 65.58 | 1038.9 | 0.95 | 4.9 |
| 2019/3/29 14:00 | 24.85 | 71.69 | 965    | 0.77 | 4.9 |
| 2019/3/29 15:00 | 24.86 | 73.71 | 809.9  | 0.72 | 4.9 |
| 2019/3/29 16:00 | 24.93 | 76.07 | 601.2  | 0.65 | 4.9 |
| 2019/3/29 17:00 | 24.76 | 77.44 | 356.4  | 0.61 | 4.9 |
| 2019/3/29 18:00 | 24.8  | 76.97 | 116.5  | 0.63 | 4.8 |
| 2019/3/29 19:00 | 24.68 | 77.92 | 2.2    | 0.60 | 4.8 |
| 2019/3/29 20:00 | 24.7  | 76.66 | -1.2   | 0.63 | 4.8 |
| 2019/3/29 21:00 | 24.62 | 74.16 | -1.2   | 0.70 | 4.8 |
| 2019/3/29 22:00 | 24.68 | 74.32 | -1.2   | 0.69 | 4.7 |
| 2019/3/29 23:00 | 24.16 | 75.37 | -0.9   | 0.65 | 4.7 |
| 2019/3/30 0:00  | 23.41 | 73.28 | -1     | 0.69 | 4.7 |
| 2019/3/30 1:00  | 22.63 | 76.13 | -1     | 0.60 | 4.7 |
| 2019/3/30 2:00  | 21.96 | 79.63 | -1     | 0.50 | 4.7 |
| 2019/3/30 3:00  | 21    | 83.17 | -1.1   | 0.39 | 4.7 |
| 2019/3/30 4:00  | 20.53 | 85.68 | -1.2   | 0.33 | 4.7 |
| 2019/3/30 5:00  | 20.31 | 86.11 | -1.2   | 0.31 | 4.7 |
| 2019/3/30 6:00  | 20.09 | 86.9  | -0.1   | 0.29 | 4.6 |
| 2019/3/30 7:00  | 20.05 | 87.2  | 89.4   | 0.29 | 4.6 |
| 2019/3/30 8:00  | 21.47 | 82.62 | 302.8  | 0.41 | 4.6 |
| 2019/3/30 9:00  | 24.77 | 68.66 | 557    | 0.85 | 4.7 |
| 2019/3/30 10:00 | 27.24 | 55.23 | 779.2  | 1.32 | 4.7 |
| 2019/3/30 11:00 | 28.89 | 47.84 | 941.4  | 1.63 | 4.7 |

---

|                 |       |       |        |      |     |
|-----------------|-------|-------|--------|------|-----|
| 2019/3/30 12:00 | 30.25 | 42.21 | 952.6  | 1.88 | 4.8 |
| 2019/3/30 13:00 | 27.01 | 67.8  | 1022   | 0.94 | 4.8 |
| 2019/3/30 14:00 | 25.65 | 78.81 | 955.6  | 0.59 | 4.8 |
| 2019/3/30 15:00 | 25.68 | 76.89 | 815.9  | 0.65 | 4.8 |
| 2019/3/30 16:00 | 25.6  | 78.36 | 600.9  | 0.60 | 4.8 |
| 2019/3/30 17:00 | 25.57 | 77.69 | 354.6  | 0.62 | 4.8 |
| 2019/3/30 18:00 | 25.6  | 75.45 | 116.9  | 0.69 | 4.8 |
| 2019/3/30 19:00 | 25.59 | 75.42 | 2.1    | 0.69 | 4.7 |
| 2019/3/30 20:00 | 25.45 | 77.11 | -1     | 0.64 | 4.7 |
| 2019/3/30 21:00 | 25.29 | 77.74 | -1.1   | 0.62 | 4.7 |
| 2019/3/30 22:00 | 25.12 | 74.01 | -1.1   | 0.71 | 4.7 |
| 2019/3/30 23:00 | 24.94 | 72.73 | -1     | 0.74 | 4.7 |
| 2019/3/31 0:00  | 24.11 | 72.66 | -0.9   | 0.72 | 4.6 |
| 2019/3/31 1:00  | 23.29 | 73.9  | -0.9   | 0.67 | 4.6 |
| 2019/3/31 2:00  | 22.62 | 76.02 | -1     | 0.60 | 4.6 |
| 2019/3/31 3:00  | 22.28 | 80.11 | -1.1   | 0.49 | 4.6 |
| 2019/3/31 4:00  | 22.17 | 82.3  | -1.1   | 0.43 | 4.6 |
| 2019/3/31 5:00  | 21.88 | 84.02 | -1.1   | 0.39 | 4.6 |
| 2019/3/31 6:00  | 21.48 | 86.11 | 0.3    | 0.33 | 4.6 |
| 2019/3/31 7:00  | 21.95 | 84.83 | 91.7   | 0.37 | 4.6 |
| 2019/3/31 8:00  | 22.98 | 80.92 | 305.8  | 0.48 | 4.6 |
| 2019/3/31 9:00  | 25.06 | 71.66 | 520.5  | 0.78 | 4.6 |
| 2019/3/31 10:00 | 26.65 | 64.48 | 736.1  | 1.03 | 4.6 |
| 2019/3/31 11:00 | 24.69 | 79.15 | 913.1  | 0.56 | 4.7 |
| 2019/3/31 12:00 | 24.85 | 79.42 | 1024.7 | 0.56 | 4.7 |
| 2019/3/31 13:00 | 24.8  | 81.18 | 1033.6 | 0.51 | 4.7 |
| 2019/3/31 14:00 | 25    | 80.8  | 963.2  | 0.53 | 4.7 |
| 2019/3/31 15:00 | 25.03 | 81.9  | 793.6  | 0.50 | 4.7 |
| 2019/3/31 16:00 | 25.06 | 83.1  | 598.8  | 0.46 | 4.7 |
| 2019/3/31 17:00 | 25.12 | 81.41 | 352.4  | 0.51 | 4.7 |
| 2019/3/31 18:00 | 25.15 | 80.38 | 113    | 0.54 | 4.7 |
| 2019/3/31 19:00 | 25.01 | 81.15 | 1.9    | 0.52 | 4.6 |
| 2019/3/31 20:00 | 25.05 | 80.87 | -1     | 0.52 | 4.6 |
| 2019/3/31 21:00 | 24.99 | 84.14 | -1     | 0.43 | 4.6 |
| 2019/3/31 22:00 | 24.99 | 85.66 | -1     | 0.39 | 4.6 |
| 2019/3/31 23:00 | 24.99 | 86.78 | -0.9   | 0.36 | 4.6 |
| 2019/4/1 0:00   | 25.02 | 88.3  | -1     | 0.32 | 4.6 |
| 2019/4/1 1:00   | 25.09 | 84.5  | -1     | 0.43 | 4.5 |
| 2019/4/1 2:00   | 24.68 | 83    | -0.9   | 0.46 | 4.5 |
| 2019/4/1 3:00   | 23.8  | 86    | -1     | 0.37 | 4.5 |
| 2019/4/1 4:00   | 23.31 | 86.1  | -0.8   | 0.36 | 4.5 |
| 2019/4/1 5:00   | 22.74 | 88.1  | -0.8   | 0.30 | 4.5 |

|                |       |      |        |      |     |
|----------------|-------|------|--------|------|-----|
| 2019/4/1 6:00  | 22    | 89.9 | 0.1    | 0.25 | 4.5 |
| 2019/4/1 7:00  | 22.14 | 88.8 | 58.3   | 0.27 | 4.5 |
| 2019/4/1 8:00  | 22.93 | 82.9 | 206.3  | 0.43 | 4.5 |
| 2019/4/1 9:00  | 24.77 | 73.9 | 535.4  | 0.71 | 4.5 |
| 2019/4/1 10:00 | 26.85 | 63.9 | 763.7  | 1.05 | 4.5 |
| 2019/4/1 11:00 | 28.23 | 57.9 | 872.4  | 1.28 | 4.6 |
| 2019/4/1 12:00 | 25.69 | 77.6 | 1000.5 | 0.63 | 4.6 |
| 2019/4/1 13:00 | 25.68 | 77.4 | 1015.1 | 0.63 | 4.6 |
| 2019/4/1 14:00 | 25.63 | 77.6 | 939.5  | 0.63 | 4.7 |
| 2019/4/1 15:00 | 25.57 | 78.4 | 794.9  | 0.60 | 4.7 |
| 2019/4/1 16:00 | 25.58 | 79   | 591.3  | 0.59 | 4.6 |
| 2019/4/1 17:00 | 25.64 | 77.7 | 352.3  | 0.62 | 4.6 |
| 2019/4/1 18:00 | 25.6  | 76.4 | 113    | 0.66 | 4.6 |
| 2019/4/1 19:00 | 25.35 | 77.3 | 1.9    | 0.63 | 4.5 |
| 2019/4/1 20:00 | 25.28 | 80.5 | -1     | 0.54 | 4.5 |
| 2019/4/1 21:00 | 25.14 | 83.9 | -1.1   | 0.44 | 4.5 |
| 2019/4/1 22:00 | 25.21 | 84.3 | -1     | 0.43 | 4.5 |
| 2019/4/1 23:00 | 25.23 | 86.4 | -1     | 0.38 | 4.5 |
| 2019/4/2 0:00  | 25.22 | 86.5 | -1.1   | 0.37 | 4.5 |
| 2019/4/2 1:00  | 25.19 | 87.1 | -0.6   | 0.36 | 4.5 |
| 2019/4/2 2:00  | 25.13 | 88.1 | -0.8   | 0.33 | 4.4 |
| 2019/4/2 3:00  | 25.05 | 89.1 | -0.7   | 0.30 | 4.4 |
| 2019/4/2 4:00  | 24.98 | 90.3 | -0.8   | 0.27 | 4.4 |
| 2019/4/2 5:00  | 25    | 90.6 | -0.7   | 0.26 | 4.4 |
| 2019/4/2 6:00  | 25.06 | 90.3 | 0.2    | 0.27 | 4.4 |
| 2019/4/2 7:00  | 25.1  | 89.9 | 36.9   | 0.28 | 4.4 |
| 2019/4/2 8:00  | 25.16 | 89.7 | 154.7  | 0.28 | 4.4 |
| 2019/4/2 9:00  | 25.29 | 88.4 | 336.9  | 0.32 | 4.5 |
| 2019/4/2 10:00 | 25.66 | 86.4 | 713.7  | 0.38 | 4.5 |
| 2019/4/2 11:00 | 25.58 | 83.7 | 905.8  | 0.46 | 4.5 |
| 2019/4/2 12:00 | 25.61 | 81.5 | 981.2  | 0.52 | 4.6 |
| 2019/4/2 13:00 | 25.47 | 84.2 | 986    | 0.44 | 4.6 |
| 2019/4/2 14:00 | 25.45 | 83.8 | 830.2  | 0.45 | 4.6 |
| 2019/4/2 15:00 | 25.43 | 82.1 | 435.8  | 0.50 | 4.6 |
| 2019/4/2 16:00 | 25.46 | 83.1 | 379    | 0.47 | 4.6 |
| 2019/4/2 17:00 | 25.5  | 84.9 | 225.3  | 0.42 | 4.6 |
| 2019/4/2 18:00 | 25.39 | 86.9 | 51.4   | 0.36 | 4.5 |
| 2019/4/2 19:00 | 25.45 | 87.7 | 1.2    | 0.34 | 4.5 |
| 2019/4/2 20:00 | 25.53 | 86.9 | -0.5   | 0.37 | 4.5 |
| 2019/4/2 21:00 | 25.68 | 85.8 | -0.6   | 0.40 | 4.5 |
| 2019/4/2 22:00 | 25.8  | 86   | -0.6   | 0.39 | 4.5 |
| 2019/4/2 23:00 | 25.9  | 84.2 | -0.6   | 0.45 | 4.5 |

|                |       |      |       |      |     |
|----------------|-------|------|-------|------|-----|
| 2019/4/3 0:00  | 25.95 | 83.5 | -0.7  | 0.47 | 4.4 |
| 2019/4/3 1:00  | 25.8  | 87   | -0.7  | 0.37 | 4.4 |
| 2019/4/3 2:00  | 25.48 | 85.9 | -0.7  | 0.39 | 4.4 |
| 2019/4/3 3:00  | 24.86 | 83.4 | -0.7  | 0.45 | 4.4 |
| 2019/4/3 4:00  | 24.01 | 84.2 | -0.7  | 0.42 | 4.4 |
| 2019/4/3 5:00  | 23.37 | 85.8 | -0.8  | 0.37 | 4.4 |
| 2019/4/3 6:00  | 22.74 | 88.4 | 0.7   | 0.29 | 4.4 |
| 2019/4/3 7:00  | 22.65 | 89.9 | 86.7  | 0.25 | 4.4 |
| 2019/4/3 8:00  | 24.32 | 85.1 | 278   | 0.40 | 4.4 |
| 2019/4/3 9:00  | 26.71 | 71.7 | 541.8 | 0.82 | 4.4 |
| 2019/4/3 10:00 | 28.46 | 60.5 | 756.4 | 1.21 | 4.4 |
| 2019/4/3 11:00 | 30.23 | 50   | 922.4 | 1.62 | 4.5 |
| 2019/4/3 12:00 | 31.75 | 44.8 | 991.6 | 1.87 | 4.5 |
| 2019/4/3 13:00 | 30.46 | 56.8 | 820.7 | 1.41 |     |
| 2019/4/3 14:00 | 26.3  | 84.3 | 596.8 | 0.45 |     |
| 2019/4/3 15:00 | 26.23 | 84.3 | 797.5 | 0.45 |     |
| 2019/4/3 16:00 | 26.29 | 82.6 | 577.1 | 0.50 | 4.6 |
| 2019/4/3 17:00 | 26.45 | 81.1 | 318.5 | 0.54 | 4.6 |
| 2019/4/3 18:00 | 26.39 | 82.6 | 93.3  | 0.50 | 4.6 |
| 2019/4/3 19:00 | 26.31 | 83.3 | 2.5   | 0.48 | 4.6 |
| 2019/4/3 20:00 | 26.39 | 83.3 | -0.8  | 0.48 | 4.6 |
| 2019/4/3 21:00 | 26.62 | 85.4 | -1    | 0.42 | 4.6 |
| 2019/4/3 22:00 | 26.66 | 76.8 | -1    | 0.67 | 4.5 |
| 2019/4/3 23:00 | 26.55 | 68.9 | -1.2  | 0.90 | 4.5 |
| 2019/4/4 0:00  | 26.7  | 66.4 | -0.7  | 0.98 | 4.5 |
| 2019/4/4 1:00  | 25.81 | 70   | -0.8  | 0.84 | 4.5 |
| 2019/4/4 2:00  | 25.09 | 74.6 | -0.9  | 0.70 | 4.5 |
| 2019/4/4 3:00  | 24.3  | 80.5 | -0.9  | 0.52 | 4.5 |
| 2019/4/4 4:00  | 23.64 | 85.1 | -1    | 0.39 | 4.5 |
| 2019/4/4 5:00  | 23.08 | 87.3 | -1.1  | 0.32 | 4.5 |
| 2019/4/4 6:00  | 22.71 | 88.8 | 1.2   | 0.28 | 4.5 |
| 2019/4/4 7:00  | 22.66 | 89.3 | 97.5  | 0.27 | 4.5 |
| 2019/4/4 8:00  | 24.26 | 83.2 | 262.9 | 0.45 | 4.5 |
| 2019/4/4 9:00  | 26.45 | 69   | 572.2 | 0.89 | 4.5 |
| 2019/4/4 10:00 | 28.57 | 55.8 | 793.6 | 1.36 | 4.5 |
| 2019/4/4 11:00 | 30.52 | 46.4 | 919.9 | 1.75 | 4.6 |
| 2019/4/4 12:00 | 32.11 | 41.7 | 979.9 | 2.00 | 4.6 |
| 2019/4/4 13:00 | 33.34 | 36.8 | 992.3 | 2.24 | 4.6 |
| 2019/4/4 14:00 | 34.62 | 32.7 | 898.6 | 2.46 | 4.6 |
| 2019/4/4 15:00 | 27.35 | 82.4 | 802.5 | 0.52 | 4.6 |
| 2019/4/4 16:00 | 26.87 | 84.4 | 589.7 | 0.46 | 4.6 |
| 2019/4/4 17:00 | 26.62 | 85.7 | 345.3 | 0.41 | 4.5 |



---

|                |       |      |        |      |     |
|----------------|-------|------|--------|------|-----|
| 2019/4/4 18:00 | 26.72 | 85.1 | 113.4  | 0.43 | 4.5 |
| 2019/4/4 19:00 | 26.52 | 86.7 | 2.4    | 0.38 | 4.5 |
| 2019/4/4 20:00 | 26.46 | 88.1 | -1.2   | 0.34 | 4.5 |
| 2019/4/4 21:00 | 26.59 | 89.6 | -1.4   | 0.30 | 4.4 |
| 2019/4/4 22:00 | 26.51 | 87.7 | -1.1   | 0.35 | 4.4 |
| 2019/4/4 23:00 | 26.17 | 76.8 | -0.9   | 0.66 | 4.4 |
| 2019/4/5 0:00  | 26.24 | 67.6 | -1.1   | 0.93 | 4.4 |
| 2019/4/5 1:00  | 26.23 | 68.2 | -1     | 0.91 | 4.4 |
| 2019/4/5 2:00  | 25.52 | 71.5 | -0.8   | 0.79 | 4.4 |
| 2019/4/5 3:00  | 24.83 | 76.5 | -0.9   | 0.64 | 4.4 |
| 2019/4/5 4:00  | 24.08 | 82.1 | -0.9   | 0.47 | 4.4 |
| 2019/4/5 5:00  | 23.29 | 87.6 | -1     | 0.32 | 4.4 |
| 2019/4/5 6:00  | 22.69 | 91.3 | 0.9    | 0.22 | 4.4 |
| 2019/4/5 7:00  | 22.64 | 92.4 | 105    | 0.19 | 4.4 |
| 2019/4/5 8:00  | 24.29 | 86.4 | 304.5  | 0.36 | 4.4 |
| 2019/4/5 9:00  | 26.43 | 74.3 | 579.8  | 0.74 | 4.4 |
| 2019/4/5 10:00 | 28.59 | 61.4 | 802.4  | 1.19 | 4.4 |
| 2019/4/5 11:00 | 30.67 | 50.8 | 967    | 1.62 | 4.5 |
| 2019/4/5 12:00 | 32.44 | 40.7 | 1025.3 | 2.05 | 4.5 |
| 2019/4/5 13:00 | 33.98 | 34.4 | 1020   | 2.36 | 4.5 |
| 2019/4/5 14:00 | 29.19 | 68.1 | 944.5  | 1.00 | 4.5 |
| 2019/4/5 15:00 | 27.14 | 83   | 778.1  | 0.50 | 4.5 |
| 2019/4/5 16:00 | 26.7  | 84.3 | 578.5  | 0.46 | 4.5 |
| 2019/4/5 17:00 | 26.68 | 82.4 | 331.2  | 0.51 | 4.4 |
| 2019/4/5 18:00 | 26.71 | 82.7 | 100.8  | 0.50 | 4.4 |
| 2019/4/5 19:00 | 26.91 | 81.7 | 2.7    | 0.54 | 4.4 |
| 2019/4/5 20:00 | 27.02 | 81.8 | -1     | 0.53 | 4.4 |
| 2019/4/5 21:00 | 26.95 | 83   | -1     | 0.50 | 4.4 |
| 2019/4/5 22:00 | 26.64 | 78.7 | -1     | 0.62 | 4.3 |
| 2019/4/5 23:00 | 26.46 | 69.8 | -1.3   | 0.87 | 4.3 |
| 2019/4/6 0:00  | 27.06 | 65.8 | -1.1   | 1.00 | 4.3 |
| 2019/4/6 1:00  | 26.44 | 71   | -0.8   | 0.83 | 4.3 |
| 2019/4/6 2:00  | 25.46 | 75.9 | -0.9   | 0.67 | 4.3 |
| 2019/4/6 3:00  | 24.53 | 81.3 | -1     | 0.50 | 4.3 |
| 2019/4/6 4:00  | 23.72 | 86.9 | -1.1   | 0.34 | 4.3 |
| 2019/4/6 5:00  | 23.28 | 90.4 | -1.2   | 0.25 | 4.3 |
| 2019/4/6 6:00  | 23.11 | 92.2 | 1.1    | 0.20 | 4.3 |
| 2019/4/6 7:00  | 23.45 | 91.3 | 109.2  | 0.22 | 4.3 |
| 2019/4/6 8:00  | 25.11 | 84.5 | 292.3  | 0.43 | 4.3 |
| 2019/4/6 9:00  | 27.12 | 73.4 | 578.1  | 0.78 | 4.3 |
| 2019/4/6 10:00 | 28.88 | 63.8 | 787.5  | 1.13 | 4.3 |
| 2019/4/6 11:00 | 30.7  | 54.7 | 909.6  | 1.49 | 4.4 |

|                |       |      |        |      |     |
|----------------|-------|------|--------|------|-----|
| 2019/4/6 12:00 | 32.53 | 46.5 | 1049.9 | 1.85 | 4.4 |
| 2019/4/6 13:00 | 33.59 | 41.9 | 877.7  | 2.07 | 4.4 |
| 2019/4/6 14:00 | 34.35 | 38.4 | 711.5  | 2.24 | 4.4 |
| 2019/4/6 15:00 | 30.96 | 60.5 | 589.9  | 1.31 | 4.4 |
| 2019/4/6 16:00 | 27.04 | 84.3 | 402.6  | 0.46 | 4.4 |
| 2019/4/6 17:00 | 27.28 | 83.7 | 356.7  | 0.48 | 4.4 |
| 2019/4/6 18:00 | 27.39 | 84.7 | 54.3   | 0.45 | 4.3 |
| 2019/4/6 19:00 | 29.02 | 72.6 | -0.4   | 0.86 | 4.3 |
| 2019/4/6 20:00 | 32.04 | 43.8 | -0.8   | 1.92 | 4.3 |
| 2019/4/6 21:00 | 31.01 | 47.5 | -0.6   | 1.74 | 4.3 |
| 2019/4/6 22:00 | 29.66 | 50.4 | -0.6   | 1.58 | 4.3 |
| 2019/4/6 23:00 | 28.48 | 56.4 | -0.6   | 1.34 | 4.2 |
| 2019/4/7 0:00  | 27.28 | 63.9 | -0.7   | 1.07 | 4.2 |
| 2019/4/7 1:00  | 26.4  | 69.2 | -0.8   | 0.89 | 4.2 |
| 2019/4/7 2:00  | 25.78 | 74.1 | -0.9   | 0.73 | 4.2 |
| 2019/4/7 3:00  | 25.21 | 78.2 | -0.8   | 0.60 | 4.2 |
| 2019/4/7 4:00  | 24.73 | 82   | -0.9   | 0.49 | 4.2 |
| 2019/4/7 5:00  | 24.42 | 85.1 | -0.9   | 0.40 | 4.2 |
| 2019/4/7 6:00  | 24.28 | 87   | 1.7    | 0.35 | 4.2 |
| 2019/4/7 7:00  | 24.3  | 87.6 | 106.7  | 0.33 | 4.2 |
| 2019/4/7 8:00  | 25.58 | 82.7 | 275.7  | 0.48 | 4.2 |
| 2019/4/7 9:00  | 27.4  | 72.4 | 587.4  | 0.82 | 4.2 |
| 2019/4/7 10:00 | 29.19 | 62.3 | 692.2  | 1.19 | 4.1 |
| 2019/4/7 11:00 | 31.15 | 51.5 | 994.7  | 1.62 | 4.2 |
| 2019/4/7 12:00 | 32.64 | 46.3 | 957.9  | 1.86 | 4.2 |
| 2019/4/7 13:00 | 33.71 | 42.2 | 895.2  | 2.06 | 4.2 |
| 2019/4/7 14:00 | 34.69 | 38.6 | 805.7  | 2.25 | 4.2 |
| 2019/4/7 15:00 | 33.09 | 50.1 | 683    | 1.75 | 4.2 |
| 2019/4/7 16:00 | 26.98 | 85.5 | 351.6  | 0.42 | 4.2 |
| 2019/4/7 17:00 | 27.13 | 85.3 | 286.8  | 0.43 | 4.1 |
| 2019/4/7 18:00 | 28.34 | 77.8 | 82     | 0.68 | 4.1 |
| 2019/4/7 19:00 | 33.32 | 39.4 | 1      | 2.14 | 4.1 |
| 2019/4/7 20:00 | 32.5  | 41.2 | -0.8   | 2.03 | 4   |
| 2019/4/7 21:00 | 31.14 | 46.5 | -0.6   | 1.78 | 4   |
| 2019/4/7 22:00 | 29.88 | 52.8 | -0.6   | 1.52 | 4   |
| 2019/4/7 23:00 | 28.64 | 57.9 | -0.6   | 1.30 | 4   |
| 2019/4/8 0:00  | 27.54 | 61.4 | -0.8   | 1.15 | 4   |
| 2019/4/8 1:00  | 26.53 | 67.4 | -0.8   | 0.94 | 4   |
| 2019/4/8 2:00  | 25.77 | 73.4 | -0.9   | 0.75 | 4   |
| 2019/4/8 3:00  | 25.16 | 78.1 | -0.8   | 0.60 | 4   |
| 2019/4/8 4:00  | 24.83 | 82   | -0.9   | 0.49 | 4   |
| 2019/4/8 5:00  | 24.56 | 84.3 | -0.9   | 0.42 | 4   |

|                |       |      |       |      |     |
|----------------|-------|------|-------|------|-----|
| 2019/4/8 6:00  | 24.2  | 87   | 1.8   | 0.35 | 3.9 |
| 2019/4/8 7:00  | 24.16 | 87.3 | 99.8  | 0.34 | 3.9 |
| 2019/4/8 8:00  | 25.45 | 82.1 | 265.6 | 0.50 | 3.9 |
| 2019/4/8 9:00  | 27.09 | 72.2 | 502.8 | 0.82 | 3.9 |
| 2019/4/8 10:00 | 28.99 | 61.4 | 759.1 | 1.21 | 4   |
| 2019/4/8 11:00 | 30.71 | 52.7 | 890.8 | 1.56 | 4   |
| 2019/4/8 12:00 | 32.05 | 45.9 | 927.7 | 1.85 | 4   |
| 2019/4/8 13:00 | 30.5  | 59.9 | 987.8 | 1.31 | 4.1 |
| 2019/4/8 14:00 | 27.58 | 79.9 | 866.9 | 0.60 | 4.1 |
| 2019/4/8 15:00 | 27.01 | 82.4 | 639.5 | 0.52 | 4.1 |
| 2019/4/8 16:00 | 26.65 | 84.6 | 471   | 0.45 | 4   |
| 2019/4/8 17:00 | 26.44 | 84.7 | 337.5 | 0.44 | 4   |
| 2019/4/8 18:00 | 26.13 | 86.1 | 104   | 0.40 | 4   |
| 2019/4/8 19:00 | 26    | 87.5 | 1.8   | 0.35 | 4   |
| 2019/4/8 20:00 | 25.89 | 87.5 | -0.6  | 0.35 | 4   |
| 2019/4/8 21:00 | 25.85 | 87.8 | -0.5  | 0.34 | 3.9 |
| 2019/4/8 22:00 | 25.51 | 81.4 | -0.1  | 0.52 | 3.9 |
| 2019/4/8 23:00 | 25.38 | 72.2 | -0.9  | 0.77 | 3.9 |
| 2019/4/9 0:00  | 25.64 | 69   | -1.1  | 0.87 | 3.9 |
| 2019/4/9 1:00  | 25.83 | 68.3 | -0.9  | 0.89 | 3.9 |
| 2019/4/9 2:00  | 25.82 | 69.8 | -0.9  | 0.85 | 3.9 |
| 2019/4/9 3:00  | 25.82 | 71.4 | -0.5  | 0.81 | 3.9 |
| 2019/4/9 4:00  | 25.87 | 73.6 | -0.6  | 0.74 | 3.9 |
| 2019/4/9 5:00  | 25.59 | 80.3 | -0.3  | 0.55 | 3.9 |
| 2019/4/9 6:00  | 25.54 | 78.5 | 1.1   | 0.60 | 3.9 |
| 2019/4/9 7:00  | 25.44 | 68.9 | 20    | 0.86 | 3.9 |
| 2019/4/9 8:00  | 25.14 | 68.5 | 42    | 0.87 | 3.9 |
| 2019/4/9 9:00  | 24.97 | 69.2 | 54.8  | 0.84 | 3.9 |
| 2019/4/9 10:00 | 24.93 | 65.9 | 52.5  | 0.93 | 3.9 |
| 2019/4/9 11:00 | 25.18 | 61.7 | 240.4 | 1.05 | 4   |
| 2019/4/9 12:00 | 25.18 | 63.6 | 247.1 | 1.00 | 4   |
| 2019/4/9 13:00 | 25.31 | 68.2 | 290   | 0.88 | 4   |
| 2019/4/9 14:00 | 25.1  | 74.8 | 299.9 | 0.69 | 4   |
| 2019/4/9 15:00 | 24.85 | 75   | 302.7 | 0.68 | 4   |
| 2019/4/9 16:00 | 25.05 | 70.7 | 621.2 | 0.80 | 4   |
| 2019/4/9 17:00 | 25.27 | 67.8 | 379.4 | 0.89 | 4.1 |
| 2019/4/9 18:00 | 24.88 | 72.5 | 128.5 | 0.75 | 4   |
| 2019/4/9 19:00 | 24.58 | 72.8 | 3.8   | 0.73 | 4   |
| 2019/4/9 20:00 | 24.5  | 70.1 | -1.3  | 0.80 | 4   |
| 2019/4/9 21:00 | 24.37 | 70.7 | -1.3  | 0.78 | 4   |
| 2019/4/9 22:00 | 24.3  | 70   | -1.4  | 0.80 | 4   |
| 2019/4/9 23:00 | 24.15 | 70.7 | -1.4  | 0.78 | 4   |

---

|                 |       |      |        |      |     |
|-----------------|-------|------|--------|------|-----|
| 2019/4/10 0:00  | 23.94 | 71.2 | -1.4   | 0.76 | 4   |
| 2019/4/10 1:00  | 23.78 | 71   | -1.5   | 0.76 | 4   |
| 2019/4/10 2:00  | 23.73 | 69   | -1.2   | 0.81 | 3.9 |
| 2019/4/10 3:00  | 23.69 | 64.9 | -1.3   | 0.91 | 4   |
| 2019/4/10 4:00  | 23.72 | 60.6 | -1.5   | 1.03 | 4   |
| 2019/4/10 5:00  | 22.09 | 69.6 | -0.9   | 0.74 | 4   |
| 2019/4/10 6:00  | 19.48 | 84.4 | 2.6    | 0.34 | 3.9 |
| 2019/4/10 7:00  | 19.47 | 84.5 | 124.9  | 0.34 | 3.9 |
| 2019/4/10 8:00  | 21.61 | 75.2 | 344.6  | 0.59 | 4   |
| 2019/4/10 9:00  | 24.1  | 61.1 | 604.9  | 1.03 | 4   |
| 2019/4/10 10:00 | 24.26 | 59.4 | 847.4  | 1.08 | 4   |
| 2019/4/10 11:00 | 24.24 | 60.7 | 1004.2 | 1.05 | 4.1 |
| 2019/4/10 12:00 | 24.35 | 60.5 | 1077   | 1.06 | 4.1 |
| 2019/4/10 13:00 | 24.49 | 61.3 | 1068   | 1.04 | 4.2 |
| 2019/4/10 14:00 | 24.52 | 62.5 | 1002.8 | 1.01 | 4.2 |
| 2019/4/10 15:00 | 24.62 | 63.8 | 855.9  | 0.98 | 4.2 |
| 2019/4/10 16:00 | 24.86 | 61.1 | 650.6  | 1.06 | 4.2 |
| 2019/4/10 17:00 | 25.03 | 60.9 | 390.5  | 1.07 | 4.1 |
| 2019/4/10 18:00 | 25.16 | 58.7 | 144.3  | 1.14 | 4.1 |
| 2019/4/10 19:00 | 24.85 | 59   | 4.5    | 1.12 | 4.1 |
| 2019/4/10 20:00 | 24.62 | 60.8 | -1.5   | 1.06 | 4.1 |
| 2019/4/10 21:00 | 24.49 | 63.7 | -1.5   | 0.97 | 4.1 |
| 2019/4/10 22:00 | 24.32 | 66   | -1.2   | 0.91 | 4   |
| 2019/4/10 23:00 | 22.32 | 75.2 | -0.6   | 0.61 | 4   |
| 2019/4/11 0:00  | 21.34 | 79.4 | -1.2   | 0.49 | 4   |
| 2019/4/11 1:00  | 20.87 | 82.3 | -1.1   | 0.41 | 4   |
| 2019/4/11 2:00  | 20.32 | 84.3 | -1.1   | 0.36 | 4   |
| 2019/4/11 3:00  | 20.2  | 85   | -1.1   | 0.34 | 4   |
| 2019/4/11 4:00  | 19.98 | 85.8 | -1.1   | 0.32 | 4   |
| 2019/4/11 5:00  | 19.58 | 87.4 | -1     | 0.28 | 4   |
| 2019/4/11 6:00  | 18.99 | 89.6 | 3.5    | 0.22 | 4   |
| 2019/4/11 7:00  | 19.4  | 88.1 | 125.2  | 0.26 | 4   |
| 2019/4/11 8:00  | 22.25 | 80.4 | 342.9  | 0.48 | 4   |
| 2019/4/11 9:00  | 25.17 | 67.3 | 601.3  | 0.90 | 4   |
| 2019/4/11 10:00 | 27.89 | 51.9 | 839.2  | 1.45 | 4.1 |
| 2019/4/11 11:00 | 30.17 | 43.1 | 986.7  | 1.84 | 4.1 |
| 2019/4/11 12:00 | 31.91 | 38.8 | 1055.7 | 2.08 | 4.2 |
| 2019/4/11 13:00 | 33.55 | 32   | 1045.6 | 2.42 | 4.2 |
| 2019/4/11 14:00 | 34.04 | 32.3 | 974.5  | 2.44 | 4.2 |
| 2019/4/11 15:00 | 28.31 | 72.8 | 827.9  | 0.83 | 4.2 |
| 2019/4/11 16:00 | 27.37 | 79.8 | 624.7  | 0.60 | 4.2 |
| 2019/4/11 17:00 | 26.83 | 79.9 | 366.4  | 0.59 | 4.2 |

|                 |       |      |        |      |     |
|-----------------|-------|------|--------|------|-----|
| 2019/4/11 18:00 | 26.51 | 81.2 | 132.4  | 0.54 | 4.1 |
| 2019/4/11 19:00 | 26.48 | 81.8 | 3.8    | 0.52 | 4.1 |
| 2019/4/11 20:00 | 26.67 | 81.1 | -1.4   | 0.55 | 4.1 |
| 2019/4/11 21:00 | 26.7  | 82.5 | -1.3   | 0.51 | 4.1 |
| 2019/4/11 22:00 | 26.72 | 82.2 | -1.2   | 0.52 | 4   |
| 2019/4/11 23:00 | 26.06 | 69.5 | -1     | 0.87 | 4   |
| 2019/4/12 0:00  | 26.38 | 57   | -1.1   | 1.23 | 4   |
| 2019/4/12 1:00  | 25.25 | 58.2 | -0.7   | 1.15 | 4   |
| 2019/4/12 2:00  | 24.33 | 75.5 | -1     | 0.65 | 4   |
| 2019/4/12 3:00  | 23.87 | 80.7 | -1     | 0.51 | 4   |
| 2019/4/12 4:00  | 23.53 | 82.6 | -1     | 0.45 | 4   |
| 2019/4/12 5:00  | 23.08 | 84.7 | -1     | 0.39 | 4   |
| 2019/4/12 6:00  | 22.85 | 86   | 3.6    | 0.35 | 4   |
| 2019/4/12 7:00  | 23.06 | 86.4 | 115.2  | 0.35 | 4   |
| 2019/4/12 8:00  | 24.66 | 80.3 | 324.4  | 0.53 | 4   |
| 2019/4/12 9:00  | 27    | 71   | 570    | 0.85 | 4   |
| 2019/4/12 10:00 | 29.81 | 59.2 | 802.5  | 1.31 | 4.1 |
| 2019/4/12 11:00 | 32.4  | 47.2 | 948.8  | 1.82 |     |
| 2019/4/12 12:00 | 34.22 | 41.4 | 1014.8 | 2.12 |     |
| 2019/4/12 13:00 | 35.7  | 35.9 | 1008.4 | 2.41 |     |
| 2019/4/12 14:00 | 36.09 | 35   | 943.9  | 2.46 |     |
| 2019/4/12 15:00 | 28.86 | 75.2 | 787.5  | 0.77 |     |
| 2019/4/12 16:00 | 28.4  | 77.3 | 564.2  | 0.70 |     |
| 2019/4/12 17:00 | 27.94 | 79.9 | 310.3  | 0.61 |     |
| 2019/4/12 18:00 | 27.53 | 83   | 115.6  | 0.51 |     |
| 2019/4/12 19:00 | 27.42 | 84.5 | 3.8    | 0.46 |     |
| 2019/4/12 20:00 | 27.94 | 81.4 | -1.6   | 0.56 |     |
| 2019/4/12 21:00 | 31.12 | 55.9 | -1.6   | 1.47 |     |
| 2019/4/12 22:00 | 30.38 | 59   | -0.4   | 1.34 |     |
| 2019/4/12 23:00 | 29.11 | 63.2 | -0.5   | 1.15 |     |
| 2019/4/13 0:00  | 27.99 | 68.5 | -0.5   | 0.95 |     |
| 2019/4/13 1:00  | 27.1  | 73.3 | -0.7   | 0.79 |     |
| 2019/4/13 2:00  | 26.5  | 76.2 | -0.7   | 0.69 |     |
| 2019/4/13 3:00  | 25.91 | 80   | -0.8   | 0.57 |     |
| 2019/4/13 4:00  | 25.8  | 80.6 | -1     | 0.55 |     |
| 2019/4/13 5:00  | 26.47 | 77.2 | -1.1   | 0.66 |     |
| 2019/4/13 6:00  | 26.52 | 77.5 | 3.3    | 0.65 |     |
| 2019/4/13 7:00  | 26.54 | 78.7 | 99.5   | 0.62 |     |
| 2019/4/13 8:00  | 27.49 | 75   | 308.2  | 0.75 |     |
| 2019/4/13 9:00  | 28.91 | 67.6 | 556.7  | 1.01 |     |
| 2019/4/13 10:00 | 30.67 | 59.7 | 782.1  | 1.32 |     |
| 2019/4/13 11:00 | 32.39 | 53.2 | 929.7  | 1.61 |     |

|                 |       |      |       |      |
|-----------------|-------|------|-------|------|
| 2019/4/13 12:00 | 33.97 | 47.3 | 993.6 | 1.89 |
| 2019/4/13 13:00 | 35.46 | 43.5 | 924.5 | 2.11 |
| 2019/4/13 14:00 | 36.26 | 40.5 | 732.4 | 2.26 |
| 2019/4/13 15:00 | 36.97 | 38.3 | 689   | 2.39 |
| 2019/4/13 16:00 | 31.95 | 63.5 | 367.1 | 1.24 |
| 2019/4/13 17:00 | 28.18 | 86.3 | 308.1 | 0.42 |
| 2019/4/13 18:00 | 28.09 | 85.2 | 100.2 | 0.45 |
| 2019/4/13 19:00 | 28.47 | 82.1 | 3.1   | 0.55 |
| 2019/4/13 20:00 | 30.99 | 62.6 | -1.2  | 1.24 |
| 2019/4/13 21:00 | 30.42 | 62.6 | -0.3  | 1.22 |
| 2019/4/13 22:00 | 29.43 | 65.6 | -0.5  | 1.09 |
| 2019/4/13 23:00 | 28.71 | 67.6 | -0.6  | 1.00 |
| 2019/4/14 0:00  | 27.94 | 71.8 | -0.6  | 0.85 |
| 2019/4/14 1:00  | 27.29 | 74.8 | -0.8  | 0.75 |
| 2019/4/14 2:00  | 26.96 | 75.8 | -0.8  | 0.71 |
| 2019/4/14 3:00  | 26.74 | 76.2 | -0.8  | 0.69 |
| 2019/4/14 4:00  | 26.49 | 77.4 | -0.9  | 0.65 |
| 2019/4/14 5:00  | 26.34 | 78.1 | -0.8  | 0.63 |
| 2019/4/14 6:00  | 26.01 | 79.7 | 2.2   | 0.58 |
| 2019/4/14 7:00  | 25.85 | 80.6 | 83.8  | 0.55 |
| 2019/4/14 8:00  | 27.22 | 76.7 | 289.5 | 0.69 |
| 2019/4/14 9:00  | 28.89 | 69.9 | 519.7 | 0.94 |
| 2019/4/14 10:00 | 30.16 | 65.1 | 734.9 | 1.13 |
| 2019/4/14 11:00 | 27.18 | 84   | 888.4 | 0.47 |
| 2019/4/14 12:00 | 27.29 | 84.2 | 962.6 | 0.47 |
| 2019/4/14 13:00 | 27.25 | 86.2 | 954.4 | 0.41 |
| 2019/4/14 14:00 | 26.99 | 87.7 | 790.2 | 0.36 |
| 2019/4/14 15:00 | 26.24 | 84.9 | 726.9 | 0.43 |
| 2019/4/14 16:00 | 26.24 | 71.7 | 550.9 | 0.81 |
| 2019/4/14 17:00 | 25.92 | 72.2 | 313.7 | 0.79 |
| 2019/4/14 18:00 | 25.89 | 65.4 | 103.6 | 0.98 |
| 2019/4/14 19:00 | 25.59 | 67   | 3.5   | 0.92 |
| 2019/4/14 20:00 | 25.4  | 69.1 | -0.9  | 0.86 |
| 2019/4/14 21:00 | 25.31 | 69.1 | -1    | 0.85 |
| 2019/4/14 22:00 | 25.21 | 71.9 | -1    | 0.77 |
| 2019/4/14 23:00 | 25.06 | 74.7 | -1    | 0.69 |
| 2019/4/15 0:00  | 25.05 | 74   | -1    | 0.71 |
| 2019/4/15 1:00  | 24.99 | 74.5 | -0.9  | 0.70 |
| 2019/4/15 2:00  | 24.79 | 75.4 | -0.8  | 0.67 |
| 2019/4/15 3:00  | 24.54 | 76.5 | -1    | 0.63 |
| 2019/4/15 4:00  | 24.4  | 75.6 | -1.1  | 0.65 |
| 2019/4/15 5:00  | 24.4  | 74.9 | -1    | 0.67 |

|                 |       |      |        |      |
|-----------------|-------|------|--------|------|
| 2019/4/15 6:00  | 24.44 | 74.7 | 1.9    | 0.68 |
| 2019/4/15 7:00  | 24.54 | 74.2 | 91.7   | 0.69 |
| 2019/4/15 8:00  | 24.63 | 73.4 | 255.3  | 0.72 |
| 2019/4/15 9:00  | 24.76 | 73.1 | 401.2  | 0.73 |
| 2019/4/15 10:00 | 24.91 | 73.5 | 725.4  | 0.72 |
| 2019/4/15 11:00 | 24.97 | 73.7 | 805    | 0.72 |
| 2019/4/15 12:00 | 25.04 | 74.5 | 863.7  | 0.70 |
| 2019/4/15 13:00 | 25.11 | 74.9 | 972.7  | 0.69 |
| 2019/4/15 14:00 | 25.09 | 76.1 | 893.4  | 0.66 |
| 2019/4/15 15:00 | 25.17 | 76.6 | 762    | 0.64 |
| 2019/4/15 16:00 | 25.25 | 76.7 | 546.4  | 0.64 |
| 2019/4/15 17:00 | 25.24 | 77   | 312.6  | 0.63 |
| 2019/4/15 18:00 | 25.17 | 78.9 | 102    | 0.58 |
| 2019/4/15 19:00 | 25.09 | 79.3 | 3.1    | 0.57 |
| 2019/4/15 20:00 | 25.13 | 79.5 | -0.8   | 0.56 |
| 2019/4/15 21:00 | 25.17 | 80   | -0.6   | 0.55 |
| 2019/4/15 22:00 | 25.12 | 82.3 | -0.6   | 0.49 |
| 2019/4/15 23:00 | 25    | 83.6 | -0.5   | 0.45 |
| 2019/4/16 0:00  | 24.67 | 85.7 | -0.9   | 0.39 |
| 2019/4/16 1:00  | 24.34 | 87.4 | -1     | 0.34 |
| 2019/4/16 2:00  | 24.42 | 87.8 | -1     | 0.33 |
| 2019/4/16 3:00  | 24.43 | 87.3 | -0.6   | 0.34 |
| 2019/4/16 4:00  | 24.13 | 87.9 | -0.3   | 0.32 |
| 2019/4/16 5:00  | 24.38 | 86.8 | -0.5   | 0.35 |
| 2019/4/16 6:00  | 24.66 | 86.1 | 4      | 0.38 |
| 2019/4/16 7:00  | 24.61 | 87.2 | 96.4   | 0.35 |
| 2019/4/16 8:00  | 25.81 | 82.7 | 312.2  | 0.49 |
| 2019/4/16 9:00  | 27.12 | 76.4 | 481.5  | 0.69 |
| 2019/4/16 10:00 | 28.09 | 70.7 | 505    | 0.89 |
| 2019/4/16 11:00 | 28.37 | 72.1 | 715.3  | 0.86 |
| 2019/4/16 12:00 | 26.55 | 85.8 | 931.7  | 0.41 |
| 2019/4/16 13:00 | 26.21 | 88.5 | 1008.6 | 0.33 |
| 2019/4/16 14:00 | 26.13 | 87.8 | 929.6  | 0.35 |
| 2019/4/16 15:00 | 26.09 | 88.1 | 789    | 0.34 |
| 2019/4/16 16:00 | 26.16 | 86.4 | 582.5  | 0.39 |
| 2019/4/16 17:00 | 26.31 | 85.1 | 329.1  | 0.43 |
| 2019/4/16 18:00 | 26.35 | 84.8 | 111.7  | 0.44 |
| 2019/4/16 19:00 | 26.34 | 85.1 | 4.2    | 0.43 |
| 2019/4/16 20:00 | 26.28 | 86.9 | -0.5   | 0.37 |
| 2019/4/16 21:00 | 26.28 | 88.5 | -0.6   | 0.33 |
| 2019/4/16 22:00 | 26.22 | 89.2 | -0.9   | 0.31 |
| 2019/4/16 23:00 | 25.84 | 88.3 | -0.8   | 0.33 |

|                 |       |      |        |      |
|-----------------|-------|------|--------|------|
| 2019/4/17 0:00  | 25.24 | 84.9 | -0.9   | 0.42 |
| 2019/4/17 1:00  | 24.85 | 77.7 | -0.8   | 0.61 |
| 2019/4/17 2:00  | 23.99 | 78.6 | -1     | 0.56 |
| 2019/4/17 3:00  | 23.98 | 81.1 | -1.2   | 0.50 |
| 2019/4/17 4:00  | 23.6  | 86.7 | -1.2   | 0.35 |
| 2019/4/17 5:00  | 23.1  | 91.3 | -1.3   | 0.22 |
| 2019/4/17 6:00  | 22.83 | 93.5 | 5.7    | 0.16 |
| 2019/4/17 7:00  | 23.11 | 93.7 | 131.9  | 0.16 |
| 2019/4/17 8:00  | 24.79 | 88.7 | 288.1  | 0.31 |
| 2019/4/17 9:00  | 27.44 | 74.9 | 596    | 0.75 |
| 2019/4/17 10:00 | 29.45 | 64.2 | 846.7  | 1.13 |
| 2019/4/17 11:00 | 31.42 | 54.4 | 941.9  | 1.53 |
| 2019/4/17 12:00 | 32.49 | 50.4 | 931.3  | 1.72 |
| 2019/4/17 13:00 | 26.69 | 88.1 | 688.1  | 0.35 |
| 2019/4/17 14:00 | 26.7  | 87.6 | 987.4  | 0.36 |
| 2019/4/17 15:00 | 26.8  | 87.2 | 814.6  | 0.37 |
| 2019/4/17 16:00 | 27.13 | 84.8 | 598.6  | 0.45 |
| 2019/4/17 17:00 | 27.38 | 83.5 | 344.9  | 0.49 |
| 2019/4/17 18:00 | 27.6  | 83.8 | 111.7  | 0.48 |
| 2019/4/17 19:00 | 27.86 | 84.5 | 2.2    | 0.47 |
| 2019/4/17 20:00 | 28.51 | 79.2 | -1.2   | 0.64 |
| 2019/4/17 21:00 | 30.75 | 52.1 | -1.5   | 1.58 |
| 2019/4/17 22:00 | 30.16 | 51.8 | -0.6   | 1.56 |
| 2019/4/17 23:00 | 29    | 58.3 | -0.5   | 1.30 |
| 2019/4/18 0:00  | 27.76 | 66   | -0.6   | 1.02 |
| 2019/4/18 1:00  | 26.71 | 68.9 | -0.7   | 0.90 |
| 2019/4/18 2:00  | 25.63 | 74.2 | -1     | 0.72 |
| 2019/4/18 3:00  | 24.88 | 78.8 | -1.1   | 0.58 |
| 2019/4/18 4:00  | 24.22 | 84.1 | -1     | 0.42 |
| 2019/4/18 5:00  | 23.53 | 88.2 | -1.1   | 0.31 |
| 2019/4/18 6:00  | 23.77 | 89.1 | 5.4    | 0.28 |
| 2019/4/18 7:00  | 24.88 | 82.7 | 133.4  | 0.47 |
| 2019/4/18 8:00  | 26.2  | 74.1 | 328.6  | 0.74 |
| 2019/4/18 9:00  | 28.12 | 62.3 | 575.4  | 1.15 |
| 2019/4/18 10:00 | 29.92 | 54   | 847.5  | 1.48 |
| 2019/4/18 11:00 | 31.61 | 48.5 | 1001.4 | 1.74 |
| 2019/4/18 12:00 | 33.13 | 42.9 | 1055.7 | 2.01 |
| 2019/4/18 13:00 | 34.37 | 39.4 | 1032.6 | 2.20 |
| 2019/4/18 14:00 | 35.59 | 36   | 949.8  | 2.40 |
| 2019/4/18 15:00 | 36.27 | 34.4 | 739.1  | 2.50 |
| 2019/4/18 16:00 | 35.68 | 38   | 454.8  | 2.33 |
| 2019/4/18 17:00 | 30.03 | 72.9 | 377.8  | 0.87 |



|                 |       |      |        |      |
|-----------------|-------|------|--------|------|
| 2019/4/18 18:00 | 27.89 | 85.1 | 128.4  | 0.45 |
| 2019/4/18 19:00 | 27.54 | 86.6 | 4      | 0.40 |
| 2019/4/18 20:00 | 27.48 | 87.7 | -1.1   | 0.37 |
| 2019/4/18 21:00 | 27.37 | 88.4 | -1.3   | 0.34 |
| 2019/4/18 22:00 | 27.33 | 89.6 | -1.2   | 0.31 |
| 2019/4/18 23:00 | 28.23 | 64.2 | -0.5   | 1.09 |
| 2019/4/19 0:00  | 28.44 | 53.4 | -0.7   | 1.43 |
| 2019/4/19 1:00  | 27.74 | 56.6 | -0.5   | 1.30 |
| 2019/4/19 2:00  | 26.8  | 61.1 | -0.7   | 1.13 |
| 2019/4/19 3:00  | 26.01 | 66.5 | -0.4   | 0.95 |
| 2019/4/19 4:00  | 25.84 | 67.6 | -0.4   | 0.91 |
| 2019/4/19 5:00  | 25.55 | 73.2 | -0.6   | 0.75 |
| 2019/4/19 6:00  | 25.64 | 78.6 | 4.5    | 0.60 |
| 2019/4/19 7:00  | 26.34 | 80.7 | 71     | 0.55 |
| 2019/4/19 8:00  | 25.22 | 83.5 | 172.9  | 0.46 |
| 2019/4/19 9:00  | 24.86 | 82.8 | 270.7  | 0.47 |
| 2019/4/19 10:00 | 24.95 | 75.4 | 377.3  | 0.67 |
| 2019/4/19 11:00 | 24.88 | 71.5 | 437.9  | 0.78 |
| 2019/4/19 12:00 | 24.97 | 68.7 | 885    | 0.86 |
| 2019/4/19 13:00 | 25.13 | 69.1 | 873.8  | 0.85 |
| 2019/4/19 14:00 | 25.41 | 64.7 | 865.4  | 0.98 |
| 2019/4/19 15:00 | 25.53 | 62.1 | 829    | 1.06 |
| 2019/4/19 16:00 | 25.29 | 62   | 672.8  | 1.05 |
| 2019/4/19 17:00 | 25.47 | 57.9 | 373.4  | 1.17 |
| 2019/4/19 18:00 | 25.57 | 54.3 | 135.3  | 1.28 |
| 2019/4/19 19:00 | 25.69 | 49.1 | 6.2    | 1.43 |
| 2019/4/19 20:00 | 25.36 | 52.2 | -0.9   | 1.32 |
| 2019/4/19 21:00 | 25.19 | 53.7 | -0.9   | 1.28 |
| 2019/4/19 22:00 | 25.01 | 53.9 | -1.1   | 1.26 |
| 2019/4/19 23:00 | 24.97 | 53.2 | -1     | 1.28 |
| 2019/4/20 0:00  | 24.76 | 55   | -1     | 1.22 |
| 2019/4/20 1:00  | 24.63 | 54.6 | -1.1   | 1.23 |
| 2019/4/20 2:00  | 24.48 | 56.1 | -1     | 1.18 |
| 2019/4/20 3:00  | 24.33 | 57.3 | -1     | 1.14 |
| 2019/4/20 4:00  | 24.1  | 56.5 | -1     | 1.15 |
| 2019/4/20 5:00  | 23.87 | 58.2 | -1     | 1.10 |
| 2019/4/20 6:00  | 23.79 | 53.5 | 7      | 1.22 |
| 2019/4/20 7:00  | 23.71 | 54.4 | 118.5  | 1.19 |
| 2019/4/20 8:00  | 23.66 | 57.7 | 317.8  | 1.10 |
| 2019/4/20 9:00  | 23.74 | 56.3 | 558.7  | 1.14 |
| 2019/4/20 10:00 | 23.81 | 55.1 | 874.9  | 1.18 |
| 2019/4/20 11:00 | 23.79 | 57.5 | 1055.1 | 1.11 |

|                 |       |      |        |      |
|-----------------|-------|------|--------|------|
| 2019/4/20 12:00 | 23.68 | 57.3 | 1037.2 | 1.11 |
| 2019/4/20 13:00 | 23.7  | 55.9 | 1079.5 | 1.15 |
| 2019/4/20 14:00 | 23.72 | 55.6 | 1010.4 | 1.16 |
| 2019/4/20 15:00 | 23.67 | 55.5 | 867.1  | 1.16 |
| 2019/4/20 16:00 | 23.62 | 55   | 659.7  | 1.17 |
| 2019/4/20 17:00 | 23.64 | 53.7 | 401.2  | 1.20 |
| 2019/4/20 18:00 | 23.59 | 53.9 | 154.2  | 1.20 |
| 2019/4/20 19:00 | 23.22 | 55.3 | 6.6    | 1.14 |
| 2019/4/20 20:00 | 23.16 | 54.4 | -1.8   | 1.16 |
| 2019/4/20 21:00 | 23.1  | 55.4 | -1.8   | 1.14 |
| 2019/4/20 22:00 | 23.02 | 57.9 | -1.7   | 1.07 |
| 2019/4/20 23:00 | 23    | 57.9 | -1.7   | 1.07 |
| 2019/4/21 0:00  | 22.92 | 59.2 | -1.7   | 1.03 |
| 2019/4/21 1:00  | 22.31 | 62.5 | -1.1   | 0.92 |
| 2019/4/21 2:00  | 18.1  | 75.8 | -0.4   | 0.49 |
| 2019/4/21 3:00  | 16.65 | 78.3 | -0.8   | 0.41 |
| 2019/4/21 4:00  | 16    | 80   | -1.7   | 0.36 |
| 2019/4/21 5:00  | 18.58 | 70.6 | -1.5   | 0.61 |
| 2019/4/21 6:00  | 16.74 | 77.8 | 9.3    | 0.42 |
| 2019/4/21 7:00  | 17.15 | 77   | 149.4  | 0.44 |
| 2019/4/21 8:00  | 20.3  | 67.6 | 334    | 0.73 |
| 2019/4/21 9:00  | 23.4  | 55.5 | 601.1  | 1.15 |
| 2019/4/21 10:00 | 25.01 | 50.4 | 875    | 1.36 |
| 2019/4/21 11:00 | 24.56 | 59.3 | 1022   | 1.10 |
| 2019/4/21 12:00 | 24.67 | 63.2 | 1082   | 0.99 |
| 2019/4/21 13:00 | 24.89 | 65.2 | 1066.9 | 0.95 |
| 2019/4/21 14:00 | 25.05 | 67   | 991.6  | 0.90 |
| 2019/4/21 15:00 | 25.14 | 68.3 | 847.1  | 0.87 |
| 2019/4/21 16:00 | 25.15 | 71   | 637.5  | 0.80 |
| 2019/4/21 17:00 | 25.07 | 72.7 | 376.8  | 0.75 |
| 2019/4/21 18:00 | 25.12 | 72.7 | 136.3  | 0.75 |
| 2019/4/21 19:00 | 25.09 | 74.2 | 6      | 0.71 |
| 2019/4/21 20:00 | 25.07 | 75.6 | -1     | 0.67 |
| 2019/4/21 21:00 | 24.96 | 76.7 | -1     | 0.64 |
| 2019/4/21 22:00 | 24.58 | 78   | -0.9   | 0.59 |
| 2019/4/21 23:00 | 23.97 | 75.1 | -0.9   | 0.66 |
| 2019/4/22 0:00  | 23.01 | 75   | -0.9   | 0.63 |
| 2019/4/22 1:00  | 22.37 | 76.5 | -1.1   | 0.58 |
| 2019/4/22 2:00  | 21.93 | 76.8 | -1.1   | 0.56 |
| 2019/4/22 3:00  | 21.23 | 79.6 | -0.9   | 0.48 |
| 2019/4/22 4:00  | 20.84 | 80.7 | -1.1   | 0.45 |
| 2019/4/22 5:00  | 20.38 | 83.3 | -1     | 0.38 |

|                 |       |      |        |      |
|-----------------|-------|------|--------|------|
| 2019/4/22 6:00  | 20.13 | 83.7 | 7.7    | 0.37 |
| 2019/4/22 7:00  | 20.27 | 82.1 | 129    | 0.40 |
| 2019/4/22 8:00  | 22.46 | 73.1 | 317.2  | 0.67 |
| 2019/4/22 9:00  | 25.19 | 63.6 | 569.8  | 1.00 |
| 2019/4/22 10:00 | 27.05 | 56.3 | 832.2  | 1.28 |
| 2019/4/22 11:00 | 28.2  | 52.3 | 995.1  | 1.45 |
| 2019/4/22 12:00 | 25.43 | 73.6 | 1067.5 | 0.73 |
| 2019/4/22 13:00 | 25.51 | 73.8 | 1061.5 | 0.73 |
| 2019/4/22 14:00 | 25.69 | 73.7 | 976.7  | 0.74 |
| 2019/4/22 15:00 | 25.48 | 76.8 | 827.8  | 0.65 |
| 2019/4/22 16:00 | 25.44 | 77.2 | 623.6  | 0.63 |
| 2019/4/22 17:00 | 25.4  | 77.1 | 368.7  | 0.64 |
| 2019/4/22 18:00 | 25.56 | 74.9 | 131.9  | 0.70 |
| 2019/4/22 19:00 | 25.44 | 74.9 | 5.6    | 0.70 |
| 2019/4/22 20:00 | 25.34 | 77.2 | -1.1   | 0.63 |
| 2019/4/22 21:00 | 25.15 | 80.8 | -1     | 0.53 |
| 2019/4/22 22:00 | 24.95 | 83.3 | -1.1   | 0.46 |
| 2019/4/22 23:00 | 24.59 | 82.2 | -0.9   | 0.48 |
| 2019/4/23 0:00  | 23.96 | 80.7 | -0.8   | 0.51 |
| 2019/4/23 1:00  | 23.34 | 81.2 | -1.1   | 0.48 |
| 2019/4/23 2:00  | 22.91 | 80   | -1.1   | 0.51 |
| 2019/4/23 3:00  | 22.63 | 80.4 | -1.2   | 0.49 |
| 2019/4/23 4:00  | 21.87 | 84.1 | -1.1   | 0.39 |
| 2019/4/23 5:00  | 21.37 | 86   | -1.2   | 0.33 |
| 2019/4/23 6:00  | 20.93 | 86.8 | 9.2    | 0.31 |
| 2019/4/23 7:00  | 21.14 | 84   | 156.5  | 0.38 |
| 2019/4/23 8:00  | 23.39 | 74.9 | 361.6  | 0.65 |
| 2019/4/23 9:00  | 26.18 | 63.8 | 575.5  | 1.03 |
| 2019/4/23 10:00 | 28.4  | 52.7 | 843.4  | 1.45 |
| 2019/4/23 11:00 | 30.12 | 43.2 | 998    | 1.84 |
| 2019/4/23 12:00 | 25.85 | 78   | 1057.9 | 0.62 |
| 2019/4/23 13:00 | 25.83 | 77.7 | 1048.3 | 0.63 |
| 2019/4/23 14:00 | 25.89 | 77.8 | 977.8  | 0.63 |
| 2019/4/23 15:00 | 25.89 | 78.4 | 849.1  | 0.61 |
| 2019/4/23 16:00 | 25.86 | 80   | 632.5  | 0.56 |
| 2019/4/23 17:00 | 25.89 | 80.2 | 372.4  | 0.56 |
| 2019/4/23 18:00 | 25.86 | 81.9 | 78     | 0.51 |
| 2019/4/23 19:00 | 25.8  | 85.3 | 5.2    | 0.41 |
| 2019/4/23 20:00 | 25.84 | 86.6 | -0.9   | 0.38 |
| 2019/4/23 21:00 | 25.98 | 87.1 | -0.9   | 0.37 |
| 2019/4/23 22:00 | 25.81 | 86.6 | -0.9   | 0.38 |
| 2019/4/23 23:00 | 25.19 | 86.4 | -1     | 0.37 |

|                 |       |      |        |      |
|-----------------|-------|------|--------|------|
| 2019/4/24 0:00  | 24.47 | 84.6 | -1     | 0.41 |
| 2019/4/24 1:00  | 24.97 | 76   | -1.3   | 0.66 |
| 2019/4/24 2:00  | 24.96 | 78   | -1.1   | 0.60 |
| 2019/4/24 3:00  | 24.72 | 80.8 | -1.1   | 0.52 |
| 2019/4/24 4:00  | 24.46 | 84.2 | -1     | 0.42 |
| 2019/4/24 5:00  | 24.02 | 86.8 | -1     | 0.35 |
| 2019/4/24 6:00  | 23.75 | 88.6 | 5.9    | 0.30 |
| 2019/4/24 7:00  | 24.44 | 87.2 | 125    | 0.34 |
| 2019/4/24 8:00  | 25.41 | 82.8 | 234.6  | 0.48 |
| 2019/4/24 9:00  | 26.65 | 75.1 | 402.6  | 0.72 |
| 2019/4/24 10:00 | 28.64 | 62.8 | 789.5  | 1.15 |
| 2019/4/24 11:00 | 30.66 | 51.6 | 854.6  | 1.59 |
| 2019/4/24 12:00 | 32.2  | 43.7 | 1049.7 | 1.93 |
| 2019/4/24 13:00 | 33.45 | 39.3 | 985.4  | 2.15 |
| 2019/4/24 14:00 | 28.12 | 76.3 | 838.2  | 0.72 |
| 2019/4/24 15:00 | 26.35 | 86.4 | 705.2  | 0.39 |
| 2019/4/24 16:00 | 26.33 | 85.6 | 602.9  | 0.41 |
| 2019/4/24 17:00 | 26.52 | 83.9 | 341.1  | 0.46 |
| 2019/4/24 18:00 | 26.74 | 82.7 | 126.4  | 0.50 |
| 2019/4/24 19:00 | 26.74 | 83.9 | 5.1    | 0.47 |
| 2019/4/24 20:00 | 26.83 | 83.7 | -1     | 0.48 |
| 2019/4/24 21:00 | 27.53 | 72.6 | -1.9   | 0.82 |
| 2019/4/24 22:00 | 29.35 | 57.1 | -0.7   | 1.36 |
| 2019/4/24 23:00 | 28.16 | 62.7 | -0.6   | 1.14 |
| 2019/4/25 0:00  | 27.16 | 68   | -0.7   | 0.94 |
| 2019/4/25 1:00  | 26.28 | 72.3 | -0.7   | 0.79 |
| 2019/4/25 2:00  | 25.58 | 76.5 | -0.9   | 0.66 |
| 2019/4/25 3:00  | 24.97 | 80.3 | -0.9   | 0.54 |
| 2019/4/25 4:00  | 24.45 | 83.3 | -1     | 0.45 |
| 2019/4/25 5:00  | 24.13 | 85.5 | -1.1   | 0.38 |
| 2019/4/25 6:00  | 23.87 | 87.4 | 10.9   | 0.33 |
| 2019/4/25 7:00  | 24.02 | 86.6 | 134.3  | 0.35 |
| 2019/4/25 8:00  | 25.32 | 79.7 | 313.5  | 0.56 |
| 2019/4/25 9:00  | 27.2  | 67   | 588.6  | 0.97 |
| 2019/4/25 10:00 | 29.15 | 57.7 | 838.7  | 1.33 |
| 2019/4/25 11:00 | 31.36 | 49.8 | 990.9  | 1.68 |
| 2019/4/25 12:00 | 33.07 | 42   | 1039.9 | 2.04 |
| 2019/4/25 13:00 | 31.75 | 50.9 | 1034.5 | 1.66 |
| 2019/4/25 14:00 | 28.69 | 72.9 | 963.8  | 0.84 |
| 2019/4/25 15:00 | 27.84 | 77.8 | 809.6  | 0.67 |
| 2019/4/25 16:00 | 27.67 | 78.6 | 593.2  | 0.64 |
| 2019/4/25 17:00 | 27.08 | 83.6 | 347.7  | 0.48 |

|                 |       |      |       |      |
|-----------------|-------|------|-------|------|
| 2019/4/25 18:00 | 26.97 | 84.4 | 120.1 | 0.46 |
| 2019/4/25 19:00 | 27.01 | 84.2 | 4.2   | 0.46 |
| 2019/4/25 20:00 | 27.05 | 85   | -1.1  | 0.44 |
| 2019/4/25 21:00 | 26.96 | 86.3 | -1.2  | 0.40 |
| 2019/4/25 22:00 | 26.84 | 84.6 | -1    | 0.45 |
| 2019/4/25 23:00 | 26.73 | 82.1 | -1.4  | 0.52 |
| 2019/4/26 0:00  | 26.72 | 89.1 | -1.7  | 0.32 |
| 2019/4/26 1:00  | 26.82 | 78.5 | -1.1  | 0.63 |
| 2019/4/26 2:00  | 26.09 | 74.9 | -1    | 0.71 |
| 2019/4/26 3:00  | 25.58 | 74.6 | -1.1  | 0.71 |
| 2019/4/26 4:00  | 24.76 | 77.2 | -1    | 0.62 |
| 2019/4/26 5:00  | 24.37 | 79   | -1    | 0.56 |
| 2019/4/26 6:00  | 23.92 | 81.3 | 7.6   | 0.49 |
| 2019/4/26 7:00  | 23.45 | 83.9 | 111.3 | 0.42 |
| 2019/4/26 8:00  | 25.34 | 79.3 | 281.7 | 0.57 |
| 2019/4/26 9:00  | 27.62 | 71.2 | 526.7 | 0.86 |
| 2019/4/26 10:00 | 27.45 | 74.8 | 749.1 | 0.75 |
| 2019/4/26 11:00 | 26.4  | 81.9 | 887.8 | 0.52 |
| 2019/4/26 12:00 | 26.44 | 81.9 | 948.5 | 0.52 |
| 2019/4/26 13:00 | 26.47 | 83.3 | 925.4 | 0.48 |
| 2019/4/26 14:00 | 26.22 | 86   | 846.1 | 0.40 |
| 2019/4/26 15:00 | 26.15 | 85.6 | 699.9 | 0.41 |
| 2019/4/26 16:00 | 26.07 | 86.3 | 516   | 0.39 |
| 2019/4/26 17:00 | 26.04 | 86.3 | 302.5 | 0.39 |
| 2019/4/26 18:00 | 25.9  | 86.6 | 76    | 0.38 |
| 2019/4/26 19:00 | 25.81 | 86.3 | 4.5   | 0.39 |
| 2019/4/26 20:00 | 25.74 | 86.1 | -0.4  | 0.39 |
| 2019/4/26 21:00 | 25.79 | 85.4 | -0.4  | 0.41 |
| 2019/4/26 22:00 | 26    | 85.7 | -0.4  | 0.41 |
| 2019/4/26 23:00 | 26.09 | 87.5 | -0.7  | 0.36 |
| 2019/4/27 0:00  | 26.15 | 87.3 | -0.6  | 0.36 |
| 2019/4/27 1:00  | 26    | 88.2 | -0.4  | 0.33 |
| 2019/4/27 2:00  | 25.6  | 89.2 | -0.7  | 0.30 |
| 2019/4/27 3:00  | 24.96 | 90.5 | -1.2  | 0.26 |
| 2019/4/27 4:00  | 24.96 | 90   | -1.4  | 0.27 |
| 2019/4/27 5:00  | 24.94 | 89.7 | -1.3  | 0.28 |
| 2019/4/27 6:00  | 24.53 | 91.8 | 7     | 0.22 |
| 2019/4/27 7:00  | 24.81 | 91.5 | 104.7 | 0.23 |
| 2019/4/27 8:00  | 25.81 | 88.1 | 274.8 | 0.34 |
| 2019/4/27 9:00  | 26    | 87.9 | 385.2 | 0.34 |
| 2019/4/27 10:00 | 26.01 | 88   | 629.6 | 0.34 |
| 2019/4/27 11:00 | 26.04 | 87.9 | 891   | 0.34 |

|                 |       |      |       |      |
|-----------------|-------|------|-------|------|
| 2019/4/27 12:00 | 26.07 | 87.3 | 940.2 | 0.36 |
| 2019/4/27 13:00 | 26.16 | 87.7 | 974.8 | 0.35 |
| 2019/4/27 14:00 | 26.15 | 88.2 | 912   | 0.34 |
| 2019/4/27 15:00 | 26.29 | 87.6 | 766.7 | 0.36 |
| 2019/4/27 16:00 | 26.21 | 88.4 | 512.2 | 0.33 |
| 2019/4/27 17:00 | 26.2  | 88.2 | 245.4 | 0.34 |
| 2019/4/27 18:00 | 26.34 | 87.2 | 95.1  | 0.37 |
| 2019/4/27 19:00 | 26.43 | 86.9 | 5.9   | 0.38 |
| 2019/4/27 20:00 | 26.79 | 83.8 | -0.9  | 0.47 |
| 2019/4/27 21:00 | 26.63 | 85.8 | -0.9  | 0.41 |
| 2019/4/27 22:00 | 26.76 | 85.2 | -0.6  | 0.43 |
| 2019/4/27 23:00 | 26.54 | 86.3 | -0.5  | 0.40 |
| 2019/4/28 0:00  | 26.37 | 88.8 | -0.7  | 0.32 |
| 2019/4/28 1:00  | 26.31 | 90.4 | -1    | 0.28 |
| 2019/4/28 2:00  | 25.83 | 89.3 | -0.9  | 0.30 |
| 2019/4/28 3:00  | 24.73 | 87.7 | -0.5  | 0.33 |
| 2019/4/28 4:00  | 23.83 | 86.6 | -0.8  | 0.35 |
| 2019/4/28 5:00  | 23.61 | 85.6 | -0.9  | 0.37 |
| 2019/4/28 6:00  | 23.66 | 85.7 | 10.3  | 0.37 |
| 2019/4/28 7:00  | 24.17 | 85.6 | 127.8 | 0.38 |
| 2019/4/28 8:00  | 25.89 | 78.6 | 328.8 | 0.60 |
| 2019/4/28 9:00  | 27.91 | 65.6 | 534.1 | 1.04 |
| 2019/4/28 10:00 | 29.84 | 55.8 | 809.4 | 1.42 |
| 2019/4/28 11:00 | 31.56 | 50.2 | 993.1 | 1.68 |
| 2019/4/28 12:00 | 31.11 | 56.6 | 954.1 | 1.44 |
| 2019/4/28 13:00 | 28.78 | 74.4 | 965.3 | 0.79 |
| 2019/4/28 14:00 | 28.37 | 75.4 | 946.8 | 0.75 |
| 2019/4/28 15:00 | 27.87 | 78.6 | 805   | 0.65 |
| 2019/4/28 16:00 | 27.65 | 80.9 | 598.4 | 0.57 |
| 2019/4/28 17:00 | 27.1  | 86.2 | 347.6 | 0.41 |
| 2019/4/28 18:00 | 27.13 | 83.3 | 122.4 | 0.49 |
| 2019/4/28 19:00 | 27.35 | 82.3 | 6.3   | 0.53 |
| 2019/4/28 20:00 | 27.31 | 85.3 | -0.9  | 0.44 |
| 2019/4/28 21:00 | 27.65 | 83.8 | -1    | 0.49 |
| 2019/4/28 22:00 | 27.38 | 72.4 | -0.7  | 0.82 |
| 2019/4/28 23:00 | 26.8  | 71.3 | -0.8  | 0.84 |
| 2019/4/29 0:00  | 26.15 | 73.9 | -0.9  | 0.74 |
| 2019/4/29 1:00  | 25.63 | 76.5 | -1    | 0.66 |
| 2019/4/29 2:00  | 25.26 | 79.1 | -1.1  | 0.58 |
| 2019/4/29 3:00  | 24.95 | 83   | -1.1  | 0.46 |
| 2019/4/29 4:00  | 24.79 | 86.8 | -1.1  | 0.36 |
| 2019/4/29 5:00  | 24.35 | 89.6 | -1.1  | 0.28 |

|                 |       |      |        |      |
|-----------------|-------|------|--------|------|
| 2019/4/29 6:00  | 23.94 | 92.1 | 13     | 0.21 |
| 2019/4/29 7:00  | 24.33 | 91.4 | 138.9  | 0.23 |
| 2019/4/29 8:00  | 26.43 | 81.4 | 336.5  | 0.54 |
| 2019/4/29 9:00  | 28.34 | 68.8 | 558.2  | 0.96 |
| 2019/4/29 10:00 | 29.96 | 61.3 | 768.8  | 1.25 |
| 2019/4/29 11:00 | 31.55 | 54.2 | 900.4  | 1.54 |
| 2019/4/29 12:00 | 32.88 | 48.5 | 970.8  | 1.80 |
| 2019/4/29 13:00 | 28.07 | 79.6 | 1022.2 | 0.62 |
| 2019/4/29 14:00 | 27.44 | 83.9 | 932.6  | 0.48 |
| 2019/4/29 15:00 | 27.33 | 84.1 | 803.8  | 0.47 |
| 2019/4/29 16:00 | 27.47 | 82.1 | 557.3  | 0.53 |
| 2019/4/29 17:00 | 27.75 | 79.9 | 292.6  | 0.60 |
| 2019/4/29 18:00 | 27.97 | 80.3 | 90.7   | 0.60 |
| 2019/4/29 19:00 | 28.29 | 81.2 | 6.5    | 0.57 |
| 2019/4/29 20:00 | 28.09 | 78.2 | -0.6   | 0.66 |
| 2019/4/29 21:00 | 27.93 | 68   | -0.8   | 0.97 |
| 2019/4/29 22:00 | 27.77 | 67.5 | -0.5   | 0.98 |
| 2019/4/29 23:00 | 28.01 | 65.1 | -1     | 1.06 |
| 2019/4/30 0:00  | 27.53 | 66.5 | -0.8   | 1.00 |
| 2019/4/30 1:00  | 26.83 | 68.1 | -0.9   | 0.93 |
| 2019/4/30 2:00  | 26.16 | 74.8 | -1     | 0.72 |
| 2019/4/30 3:00  | 25.37 | 80.9 | -0.9   | 0.53 |
| 2019/4/30 4:00  | 24.47 | 84.4 | -0.9   | 0.42 |
| 2019/4/30 5:00  | 23.8  | 88   | -1.1   | 0.31 |
| 2019/4/30 6:00  | 23.32 | 90.6 | 13.6   | 0.24 |
| 2019/4/30 7:00  | 23.84 | 89.8 | 141.4  | 0.27 |
| 2019/4/30 8:00  | 25.99 | 81.5 | 334    | 0.52 |
| 2019/4/30 9:00  | 28.42 | 67.6 | 545.1  | 0.99 |
| 2019/4/30 10:00 | 29.95 | 60.3 | 781    | 1.28 |
| 2019/4/30 11:00 | 31.43 | 52.5 | 750.5  | 1.60 |
| 2019/4/30 12:00 | 32.57 | 48.1 | 942    | 1.80 |
| 2019/4/30 13:00 | 27.5  | 82.8 | 714.2  | 0.51 |
| 2019/4/30 14:00 | 27.26 | 85   | 912.1  | 0.44 |
| 2019/4/30 15:00 | 27.36 | 85.1 | 796.9  | 0.44 |
| 2019/4/30 16:00 | 27.6  | 83.5 | 577.9  | 0.49 |
| 2019/4/30 17:00 | 27.75 | 82.5 | 314    | 0.53 |
| 2019/4/30 18:00 | 27.86 | 81.8 | 132    | 0.55 |
| 2019/4/30 19:00 | 27.7  | 84.1 | 5.7    | 0.48 |
| 2019/4/30 20:00 | 27.9  | 84   | -0.7   | 0.48 |
| 2019/4/30 21:00 | 27.83 | 80   | -0.9   | 0.60 |
| 2019/4/30 22:00 | 28.17 | 66.3 | -1.4   | 1.03 |
| 2019/4/30 23:00 | 28.56 | 56.2 | -1.1   | 1.35 |

|                |       |      |        |      |
|----------------|-------|------|--------|------|
| 2019/9/1 0:00  | 27.23 | 84.7 | -0.7   | 0.45 |
| 2019/9/1 1:00  | 26    | 90.2 | -0.8   | 0.28 |
| 2019/9/1 2:00  | 25.55 | 91.6 | -0.5   | 0.23 |
| 2019/9/1 3:00  | 25.28 | 91.9 | -0.7   | 0.22 |
| 2019/9/1 4:00  | 24.94 | 93.3 | -0.5   | 0.18 |
| 2019/9/1 5:00  | 24.83 | 93.3 | -0.8   | 0.18 |
| 2019/9/1 6:00  | 24.56 | 94.1 | 2.2    | 0.16 |
| 2019/9/1 7:00  | 24.33 | 94.9 | 116.5  | 0.14 |
| 2019/9/1 8:00  | 26.85 | 85.9 | 305.8  | 0.41 |
| 2019/9/1 9:00  | 28.25 | 80.3 | 618    | 0.60 |
| 2019/9/1 10:00 | 28.38 | 79   | 704.6  | 0.64 |
| 2019/9/1 11:00 | 28.4  | 80.1 | 942.5  | 0.61 |
| 2019/9/1 12:00 | 28.53 | 80.8 | 993.7  | 0.59 |
| 2019/9/1 13:00 | 28.64 | 81   | 1016.2 | 0.59 |
| 2019/9/1 14:00 | 28.89 | 79.1 | 909.6  | 0.65 |
| 2019/9/1 15:00 | 28.93 | 79.6 | 783.6  | 0.64 |
| 2019/9/1 16:00 | 28.89 | 81.5 | 615.3  | 0.58 |
| 2019/9/1 17:00 | 28.81 | 83.1 | 425.4  | 0.53 |
| 2019/9/1 18:00 | 28.64 | 85.2 | 126.7  | 0.46 |
| 2019/9/1 19:00 | 28.5  | 84.9 | 6.3    | 0.46 |
| 2019/9/1 20:00 | 28.35 | 85   | -0.9   | 0.46 |
| 2019/9/1 21:00 | 27.87 | 86.1 | -1     | 0.42 |
| 2019/9/1 22:00 | 27.51 | 87.2 | -0.8   | 0.38 |
| 2019/9/1 23:00 | 26.67 | 89.7 | -0.7   | 0.30 |
| 2019/9/2 0:00  | 26.25 | 90.2 | -0.8   | 0.28 |
| 2019/9/2 1:00  | 25.89 | 91.4 | -0.7   | 0.24 |
| 2019/9/2 2:00  | 25.33 | 92.4 | -0.5   | 0.21 |
| 2019/9/2 3:00  | 25.06 | 92.7 | -0.6   | 0.20 |
| 2019/9/2 4:00  | 24.63 | 94.1 | -0.7   | 0.16 |
| 2019/9/2 5:00  | 24.35 | 95.3 | -0.8   | 0.13 |
| 2019/9/2 6:00  | 24.07 | 96   | 2.1    | 0.11 |
| 2019/9/2 7:00  | 24.14 | 96.1 | 103.2  | 0.10 |
| 2019/9/2 8:00  | 26.35 | 90.1 | 327.9  | 0.28 |
| 2019/9/2 9:00  | 28.52 | 81.1 | 414.7  | 0.58 |
| 2019/9/2 10:00 | 28.75 | 79.3 | 335.9  | 0.64 |
| 2019/9/2 11:00 | 28.99 | 76.6 | 383.3  | 0.73 |
| 2019/9/2 12:00 | 29.16 | 76.2 | 1020.5 | 0.75 |
| 2019/9/2 13:00 | 29.22 | 74.6 | 977.3  | 0.80 |
| 2019/9/2 14:00 | 29.24 | 75.3 | 833.6  | 0.78 |
| 2019/9/2 15:00 | 29.33 | 74.5 | 646.2  | 0.81 |
| 2019/9/2 16:00 | 29.39 | 75.4 | 551.1  | 0.78 |
| 2019/9/2 17:00 | 29.45 | 76.2 | 354.4  | 0.75 |



|                |       |      |       |      |
|----------------|-------|------|-------|------|
| 2019/9/2 18:00 | 29.49 | 77   | 73.6  | 0.73 |
| 2019/9/2 19:00 | 28.97 | 78.5 | 1.7   | 0.67 |
| 2019/9/2 20:00 | 27.82 | 82.3 | -0.6  | 0.53 |
| 2019/9/2 21:00 | 27.27 | 85.7 | -0.6  | 0.42 |
| 2019/9/2 22:00 | 26.55 | 88   | -0.7  | 0.35 |
| 2019/9/2 23:00 | 26.05 | 89.2 | -0.7  | 0.31 |
| 2019/9/3 0:00  | 25.61 | 90.2 | -0.6  | 0.27 |
| 2019/9/3 1:00  | 25.21 | 91.3 | -0.6  | 0.24 |
| 2019/9/3 2:00  | 24.85 | 92.6 | -0.7  | 0.20 |
| 2019/9/3 3:00  | 24.6  | 93   | -0.7  | 0.19 |
| 2019/9/3 4:00  | 24.45 | 92.7 | -0.7  | 0.20 |
| 2019/9/3 5:00  | 24.39 | 92.3 | -0.9  | 0.21 |
| 2019/9/3 6:00  | 24.55 | 90.9 | 3.2   | 0.24 |
| 2019/9/3 7:00  | 24.77 | 90.6 | 112.1 | 0.26 |
| 2019/9/3 8:00  | 26.76 | 84.8 | 329.1 | 0.44 |
| 2019/9/3 9:00  | 28.91 | 73   | 568.6 | 0.84 |
| 2019/9/3 10:00 | 30.32 | 64.3 | 744.4 | 1.16 |
| 2019/9/3 11:00 | 31.62 | 57.1 | 882.2 | 1.45 |
| 2019/9/3 12:00 | 32.13 | 55.1 | 699.7 | 1.54 |
| 2019/9/3 13:00 | 29.58 | 76.4 | 869.9 | 0.75 |
| 2019/9/3 14:00 | 29.64 | 76.3 | 550.2 | 0.76 |
| 2019/9/3 15:00 | 27.98 | 79.7 | 42.5  | 0.61 |
| 2019/9/3 16:00 | 28.85 | 79.7 | 183.1 | 0.63 |
| 2019/9/3 17:00 | 28.97 | 79.4 | 203.3 | 0.64 |
| 2019/9/3 18:00 | 29.65 | 75.1 | 115.7 | 0.79 |
| 2019/9/3 19:00 | 29.19 | 80.7 | 8.1   | 0.61 |
| 2019/9/3 20:00 | 28.93 | 80.8 | -0.8  | 0.60 |
| 2019/9/3 21:00 | 28.85 | 80.2 | -0.5  | 0.62 |
| 2019/9/3 22:00 | 28.31 | 82.7 | -0.2  | 0.53 |
| 2019/9/3 23:00 | 27.75 | 86   | -0.4  | 0.42 |
| 2019/9/4 0:00  | 26.68 | 89.6 | -0.2  | 0.30 |
| 2019/9/4 1:00  | 25.68 | 91.9 | -0.5  | 0.23 |
| 2019/9/4 2:00  | 25.05 | 92.9 | -0.5  | 0.19 |
| 2019/9/4 3:00  | 24.52 | 94.3 | -0.7  | 0.15 |
| 2019/9/4 4:00  | 24.12 | 95.6 | -0.7  | 0.12 |
| 2019/9/4 5:00  | 23.72 | 96.9 | -0.7  | 0.08 |
| 2019/9/4 6:00  | 23.51 | 97.5 | 2.2   | 0.06 |
| 2019/9/4 7:00  | 23.73 | 97.3 | 70    | 0.07 |
| 2019/9/4 8:00  | 25.13 | 91   | 278.2 | 0.25 |
| 2019/9/4 9:00  | 27.48 | 81.3 | 534.4 | 0.56 |
| 2019/9/4 10:00 | 29.54 | 73.1 | 767.7 | 0.85 |
| 2019/9/4 11:00 | 31.22 | 64.2 | 903.4 | 1.20 |

|                |       |      |       |      |
|----------------|-------|------|-------|------|
| 2019/9/4 12:00 | 31.1  | 68.6 | 912.3 | 1.04 |
| 2019/9/4 13:00 | 29.61 | 78.2 | 929.8 | 0.69 |
| 2019/9/4 14:00 | 29.34 | 79.3 | 911.4 | 0.65 |
| 2019/9/4 15:00 | 29.31 | 77.8 | 765.3 | 0.70 |
| 2019/9/4 16:00 | 29.33 | 79.8 | 597.4 | 0.64 |
| 2019/9/4 17:00 | 29.34 | 79   | 333.3 | 0.66 |
| 2019/9/4 18:00 | 29.53 | 78.4 | 94.2  | 0.69 |
| 2019/9/4 19:00 | 28.95 | 86.7 | 3.5   | 0.42 |
| 2019/9/4 20:00 | 28.85 | 87.2 | -0.7  | 0.40 |
| 2019/9/4 21:00 | 29.19 | 86   | -0.8  | 0.44 |
| 2019/9/4 22:00 | 28.95 | 88.5 | -0.6  | 0.36 |
| 2019/9/4 23:00 | 28.46 | 86.2 | -0.7  | 0.42 |
| 2019/9/5 0:00  | 27.75 | 86.5 | -0.5  | 0.41 |
| 2019/9/5 1:00  | 26.79 | 89.4 | -0.6  | 0.31 |
| 2019/9/5 2:00  | 26.27 | 88.5 | -0.7  | 0.33 |
| 2019/9/5 3:00  | 25.83 | 89   | -0.7  | 0.31 |
| 2019/9/5 4:00  | 25.51 | 90.6 | -0.8  | 0.26 |
| 2019/9/5 5:00  | 25.35 | 91.9 | -0.8  | 0.22 |
| 2019/9/5 6:00  | 25.07 | 93.5 | 2.7   | 0.18 |
| 2019/9/5 7:00  | 25.16 | 93.5 | 121   | 0.18 |
| 2019/9/5 8:00  | 26.9  | 87.1 | 340.4 | 0.38 |
| 2019/9/5 9:00  | 28.87 | 76.5 | 588.8 | 0.73 |
| 2019/9/5 10:00 | 30.43 | 67.5 | 794.7 | 1.06 |
| 2019/9/5 11:00 | 31.83 | 60.5 | 900.5 | 1.34 |
| 2019/9/5 12:00 | 29.68 | 76.8 | 995.4 | 0.74 |
| 2019/9/5 13:00 | 29.1  | 81.9 | 990.3 | 0.57 |
| 2019/9/5 14:00 | 28.78 | 84.8 | 918.4 | 0.47 |
| 2019/9/5 15:00 | 28.75 | 86.6 | 772.5 | 0.42 |
| 2019/9/5 16:00 | 28.69 | 86.8 | 565.2 | 0.41 |
| 2019/9/5 17:00 | 28.79 | 86.1 | 339   | 0.43 |
| 2019/9/5 18:00 | 28.91 | 85.2 | 105.5 | 0.46 |
| 2019/9/5 19:00 | 28.98 | 83.1 | 2.1   | 0.53 |
| 2019/9/5 20:00 | 28.89 | 79.3 | -0.6  | 0.64 |
| 2019/9/5 21:00 | 28.28 | 65.9 | -0.7  | 1.04 |
| 2019/9/5 22:00 | 27.94 | 69.8 | -1.1  | 0.91 |
| 2019/9/5 23:00 | 26.42 | 74.1 | -0.2  | 0.74 |
| 2019/9/6 0:00  | 25.55 | 76   | -0.4  | 0.67 |
| 2019/9/6 1:00  | 24.66 | 79.3 | -0.5  | 0.56 |
| 2019/9/6 2:00  | 24.48 | 82.1 | -1    | 0.48 |
| 2019/9/6 3:00  | 25.48 | 75.3 | -1.2  | 0.69 |
| 2019/9/6 4:00  | 24.79 | 78.8 | -0.6  | 0.58 |
| 2019/9/6 5:00  | 24.29 | 80.5 | -1    | 0.52 |

|                |       |      |       |      |
|----------------|-------|------|-------|------|
| 2019/9/6 6:00  | 24.09 | 82.2 | 2.9   | 0.47 |
| 2019/9/6 7:00  | 24.23 | 84.3 | 118.1 | 0.42 |
| 2019/9/6 8:00  | 26.3  | 81.5 | 336.4 | 0.53 |
| 2019/9/6 9:00  | 28.93 | 75.9 | 583.4 | 0.75 |
| 2019/9/6 10:00 | 30.61 | 66.1 | 797.5 | 1.11 |
| 2019/9/6 11:00 | 30.19 | 71.8 | 927.2 | 0.91 |
| 2019/9/6 12:00 | 28.69 | 82.8 | 996.6 | 0.53 |
| 2019/9/6 13:00 | 28.84 | 82   | 997.4 | 0.56 |
| 2019/9/6 14:00 | 28.71 | 82   | 328.8 | 0.56 |
| 2019/9/6 15:00 | 26.92 | 80   | 22.6  | 0.58 |
| 2019/9/6 16:00 | 25.56 | 84   | 22.4  | 0.45 |
| 2019/9/6 17:00 | 24.97 | 91   | 48.6  | 0.25 |
| 2019/9/6 18:00 | 26.3  | 89.8 | 85.2  | 0.29 |
| 2019/9/6 19:00 | 25.71 | 91.8 | 5.4   | 0.23 |
| 2019/9/6 20:00 | 24.78 | 91.9 | -0.8  | 0.22 |
| 2019/9/6 21:00 | 25.46 | 87.6 | -1    | 0.34 |
| 2019/9/6 22:00 | 25.27 | 87.1 | -0.8  | 0.36 |
| 2019/9/6 23:00 | 23.96 | 93   | -0.5  | 0.18 |
| 2019/9/7 0:00  | 23.75 | 92.9 | -1    | 0.19 |
| 2019/9/7 1:00  | 23.11 | 94.7 | -0.8  | 0.14 |
| 2019/9/7 2:00  | 22.7  | 96.5 | -0.9  | 0.09 |
| 2019/9/7 3:00  | 23.5  | 91.6 | -0.8  | 0.22 |
| 2019/9/7 4:00  | 23.91 | 88.4 | -0.6  | 0.30 |
| 2019/9/7 5:00  | 23.25 | 91   | -0.9  | 0.23 |
| 2019/9/7 6:00  | 24.01 | 85.5 | 1.9   | 0.38 |
| 2019/9/7 7:00  | 23.76 | 88.1 | 53.7  | 0.31 |
| 2019/9/7 8:00  | 25.33 | 87.8 | 93.8  | 0.34 |
| 2019/9/7 9:00  | 26.22 | 86.9 | 270.9 | 0.37 |
| 2019/9/7 10:00 | 27.47 | 82.9 | 403.7 | 0.51 |
| 2019/9/7 11:00 | 28.06 | 80.7 | 309   | 0.59 |
| 2019/9/7 12:00 | 27.99 | 82.6 | 361.5 | 0.53 |
| 2019/9/7 13:00 | 27.92 | 82.1 | 733.3 | 0.54 |
| 2019/9/7 14:00 | 28.09 | 80.2 | 630.9 | 0.60 |
| 2019/9/7 15:00 | 28.21 | 78.3 | 351.9 | 0.66 |
| 2019/9/7 16:00 | 28.38 | 78.4 | 385.6 | 0.66 |
| 2019/9/7 17:00 | 28.36 | 81.4 | 139.5 | 0.57 |
| 2019/9/7 18:00 | 28.17 | 83.1 | 14.4  | 0.51 |
| 2019/9/7 19:00 | 28.28 | 81.9 | -0.3  | 0.55 |
| 2019/9/7 20:00 | 27.2  | 88.2 | -0.1  | 0.35 |
| 2019/9/7 21:00 | 26.12 | 91.4 | -0.4  | 0.24 |
| 2019/9/7 22:00 | 25.32 | 91.4 | -0.2  | 0.24 |
| 2019/9/7 23:00 | 24.48 | 92.1 | -0.3  | 0.21 |

|                |       |      |       |      |
|----------------|-------|------|-------|------|
| 2019/9/8 0:00  | 24.27 | 92.3 | -0.6  | 0.21 |
| 2019/9/8 1:00  | 24.22 | 90.2 | -1.1  | 0.26 |
| 2019/9/8 2:00  | 24.34 | 87.8 | -0.6  | 0.33 |
| 2019/9/8 3:00  | 23.85 | 91.3 | -0.4  | 0.23 |
| 2019/9/8 4:00  | 24.23 | 86.5 | -0.4  | 0.36 |
| 2019/9/8 5:00  | 24.47 | 86   | -0.5  | 0.38 |
| 2019/9/8 6:00  | 25.24 | 85.4 | 1     | 0.40 |
| 2019/9/8 7:00  | 26.01 | 87.3 | 61    | 0.36 |
| 2019/9/8 8:00  | 27.12 | 85.8 | 285.4 | 0.42 |
| 2019/9/8 9:00  | 28.03 | 84.1 | 402   | 0.48 |
| 2019/9/8 10:00 | 28.4  | 83.3 | 703.4 | 0.51 |
| 2019/9/8 11:00 | 28.62 | 82.1 | 956.8 | 0.55 |
| 2019/9/8 12:00 | 28.7  | 80.8 | 1016  | 0.59 |
| 2019/9/8 13:00 | 28.77 | 79.9 | 890.4 | 0.62 |
| 2019/9/8 14:00 | 28.77 | 81.2 | 863.8 | 0.58 |
| 2019/9/8 15:00 | 28.55 | 82.9 | 56.8  | 0.53 |
| 2019/9/8 16:00 | 28.53 | 83.4 | 66.9  | 0.51 |
| 2019/9/8 17:00 | 28.71 | 79.4 | 133.6 | 0.64 |
| 2019/9/8 18:00 | 28.62 | 80   | 78.8  | 0.62 |
| 2019/9/8 19:00 | 28.72 | 78.9 | 1.7   | 0.65 |
| 2019/9/8 20:00 | 28.64 | 75.2 | -0.7  | 0.77 |
| 2019/9/8 21:00 | 27.34 | 81.9 | -0.7  | 0.54 |
| 2019/9/8 22:00 | 26.9  | 83.5 | -0.5  | 0.48 |
| 2019/9/8 23:00 | 25.88 | 87.3 | -0.4  | 0.36 |
| 2019/9/9 0:00  | 25.27 | 88.5 | -0.4  | 0.32 |
| 2019/9/9 1:00  | 24.93 | 89.5 | -0.4  | 0.29 |
| 2019/9/9 2:00  | 24.65 | 91.3 | -0.6  | 0.24 |
| 2019/9/9 3:00  | 24.52 | 90.9 | -0.6  | 0.24 |
| 2019/9/9 4:00  | 24.48 | 89.6 | -0.9  | 0.28 |
| 2019/9/9 5:00  | 24.31 | 89.9 | -0.6  | 0.27 |
| 2019/9/9 6:00  | 23.92 | 91   | 3     | 0.24 |
| 2019/9/9 7:00  | 24.44 | 90.1 | 143.5 | 0.27 |
| 2019/9/9 8:00  | 27.06 | 85.2 | 363.2 | 0.43 |
| 2019/9/9 9:00  | 29.02 | 78   | 600.5 | 0.69 |
| 2019/9/9 10:00 | 30.55 | 67.3 | 762   | 1.07 |
| 2019/9/9 11:00 | 28.87 | 82.8 | 656.2 | 0.54 |
| 2019/9/9 12:00 | 28.67 | 84.2 | 895.5 | 0.49 |
| 2019/9/9 13:00 | 28.75 | 83.8 | 627.5 | 0.50 |
| 2019/9/9 14:00 | 29.02 | 79.6 | 835.4 | 0.64 |
| 2019/9/9 15:00 | 29.25 | 76.8 | 765.5 | 0.73 |
| 2019/9/9 16:00 | 29.19 | 80.6 | 573.5 | 0.61 |
| 2019/9/9 17:00 | 29.22 | 81.8 | 249   | 0.57 |

|                 |       |      |       |      |
|-----------------|-------|------|-------|------|
| 2019/9/9 18:00  | 27.62 | 76.1 | 17.4  | 0.72 |
| 2019/9/9 19:00  | 26.68 | 79.7 | -0.9  | 0.59 |
| 2019/9/9 20:00  | 27.74 | 83   | -0.9  | 0.51 |
| 2019/9/9 21:00  | 28.83 | 83.2 | -0.8  | 0.52 |
| 2019/9/9 22:00  | 28.58 | 79.8 | -0.3  | 0.62 |
| 2019/9/9 23:00  | 27.18 | 85.8 | -0.2  | 0.42 |
| 2019/9/10 0:00  | 26.76 | 86.7 | -0.4  | 0.39 |
| 2019/9/10 1:00  | 26.18 | 89.7 | -0.5  | 0.29 |
| 2019/9/10 2:00  | 25.97 | 91.1 | -0.7  | 0.25 |
| 2019/9/10 3:00  | 25.7  | 91.9 | -0.8  | 0.23 |
| 2019/9/10 4:00  | 25.68 | 91.9 | -0.6  | 0.23 |
| 2019/9/10 5:00  | 25.24 | 93.4 | -0.7  | 0.18 |
| 2019/9/10 6:00  | 25.39 | 91.1 | 2     | 0.25 |
| 2019/9/10 7:00  | 25.71 | 87.3 | 124.5 | 0.36 |
| 2019/9/10 8:00  | 27.05 | 79   | 314.8 | 0.62 |
| 2019/9/10 9:00  | 28.54 | 73.1 | 434.6 | 0.83 |
| 2019/9/10 10:00 | 29.35 | 72.6 | 672.6 | 0.87 |
| 2019/9/10 11:00 | 29.18 | 77.7 | 538.4 | 0.70 |
| 2019/9/10 12:00 | 29.29 | 79.7 | 717.6 | 0.64 |
| 2019/9/10 13:00 | 28.83 | 83.4 | 869.2 | 0.52 |
| 2019/9/10 14:00 | 28.78 | 82.6 | 828.6 | 0.54 |
| 2019/9/10 15:00 | 28.75 | 83.1 | 541   | 0.52 |
| 2019/9/10 16:00 | 28.94 | 81   | 118.2 | 0.59 |
| 2019/9/10 17:00 | 29.07 | 81.1 | 40.8  | 0.59 |
| 2019/9/10 18:00 | 29.36 | 80.8 | 15.7  | 0.61 |
| 2019/9/10 19:00 | 28.97 | 71.2 | 0.4   | 0.90 |
| 2019/9/10 20:00 | 27.06 | 68.1 | 0     | 0.94 |
| 2019/9/10 21:00 | 26.09 | 75.6 | -0.4  | 0.69 |
| 2019/9/10 22:00 | 26.18 | 77.2 | -0.7  | 0.65 |
| 2019/9/10 23:00 | 25.69 | 80.9 | -0.3  | 0.54 |
| 2019/9/11 0:00  | 25    | 84.4 | -0.6  | 0.43 |
| 2019/9/11 1:00  | 24.97 | 85.9 | -0.7  | 0.39 |
| 2019/9/11 2:00  | 24.74 | 87.7 | -0.7  | 0.33 |
| 2019/9/11 3:00  | 24.2  | 90.3 | -0.7  | 0.26 |
| 2019/9/11 4:00  | 24.2  | 91.5 | -0.8  | 0.23 |
| 2019/9/11 5:00  | 24.2  | 92.8 | -0.9  | 0.19 |
| 2019/9/11 6:00  | 24.41 | 93.9 | 2.5   | 0.16 |
| 2019/9/11 7:00  | 25.04 | 92.6 | 116   | 0.20 |
| 2019/9/11 8:00  | 26.73 | 86.2 | 347.9 | 0.40 |
| 2019/9/11 9:00  | 28.55 | 80.6 | 572.2 | 0.60 |
| 2019/9/11 10:00 | 28.66 | 82.8 | 394.4 | 0.53 |
| 2019/9/11 11:00 | 28.63 | 85.2 | 529.3 | 0.46 |

|                 |       |      |        |      |
|-----------------|-------|------|--------|------|
| 2019/9/11 12:00 | 28.45 | 86.8 | 808.2  | 0.41 |
| 2019/9/11 13:00 | 28.66 | 84.8 | 920.8  | 0.47 |
| 2019/9/11 14:00 | 28.76 | 82.7 | 908.6  | 0.54 |
| 2019/9/11 15:00 | 28.94 | 80.2 | 678.1  | 0.62 |
| 2019/9/11 16:00 | 28.84 | 82.3 | 310.1  | 0.55 |
| 2019/9/11 17:00 | 28.92 | 83.4 | 256.9  | 0.52 |
| 2019/9/11 18:00 | 28.87 | 83.6 | 55.4   | 0.51 |
| 2019/9/11 19:00 | 29    | 80.4 | 0.3    | 0.61 |
| 2019/9/11 20:00 | 28.89 | 79.7 | -0.8   | 0.63 |
| 2019/9/11 21:00 | 28.71 | 81.6 | -0.8   | 0.57 |
| 2019/9/11 22:00 | 27.91 | 81.6 | -0.7   | 0.56 |
| 2019/9/11 23:00 | 26.9  | 86.1 | -0.9   | 0.41 |
| 2019/9/12 0:00  | 26.49 | 89   | -0.9   | 0.32 |
| 2019/9/12 1:00  | 26.04 | 90.2 | -0.9   | 0.28 |
| 2019/9/12 2:00  | 25.79 | 90.6 | -0.9   | 0.26 |
| 2019/9/12 3:00  | 25.68 | 91.2 | -1     | 0.25 |
| 2019/9/12 4:00  | 26.08 | 89.7 | -1.1   | 0.29 |
| 2019/9/12 5:00  | 25.88 | 90.8 | -0.8   | 0.26 |
| 2019/9/12 6:00  | 25.41 | 91.9 | 2.3    | 0.22 |
| 2019/9/12 7:00  | 25.9  | 91.2 | 113.4  | 0.25 |
| 2019/9/12 8:00  | 27.83 | 85.2 | 351.9  | 0.45 |
| 2019/9/12 9:00  | 28.67 | 80.5 | 538.8  | 0.60 |
| 2019/9/12 10:00 | 28.62 | 82   | 812    | 0.56 |
| 2019/9/12 11:00 | 28.56 | 82.4 | 951.9  | 0.54 |
| 2019/9/12 12:00 | 28.74 | 81.2 | 983.1  | 0.58 |
| 2019/9/12 13:00 | 28.82 | 81.6 | 1007.8 | 0.57 |
| 2019/9/12 14:00 | 28.88 | 82.2 | 905.7  | 0.55 |
| 2019/9/12 15:00 | 29.13 | 77.5 | 765.4  | 0.71 |
| 2019/9/12 16:00 | 29.06 | 79.8 | 564.2  | 0.63 |
| 2019/9/12 17:00 | 29.14 | 79.6 | 302    | 0.64 |
| 2019/9/12 18:00 | 29.18 | 79.7 | 69.7   | 0.64 |
| 2019/9/12 19:00 | 29.21 | 78.5 | 0      | 0.68 |
| 2019/9/12 20:00 | 29.08 | 78.4 | -0.8   | 0.68 |
| 2019/9/12 21:00 | 28.53 | 79.2 | -0.7   | 0.64 |
| 2019/9/12 22:00 | 27.09 | 84.1 | -0.3   | 0.47 |
| 2019/9/12 23:00 | 25.7  | 85.2 | -0.7   | 0.42 |
| 2019/9/13 0:00  | 25.17 | 85.2 | -0.9   | 0.41 |
| 2019/9/13 1:00  | 24.48 | 87.4 | -0.8   | 0.34 |
| 2019/9/13 2:00  | 24.24 | 87.5 | -0.9   | 0.33 |
| 2019/9/13 3:00  | 24.32 | 87.7 | -1.1   | 0.33 |
| 2019/9/13 4:00  | 24.77 | 86.3 | -1     | 0.37 |
| 2019/9/13 5:00  | 26.19 | 85.6 | -1     | 0.41 |

|                 |       |      |        |      |
|-----------------|-------|------|--------|------|
| 2019/9/13 6:00  | 26.32 | 86.6 | 0.6    | 0.38 |
| 2019/9/13 7:00  | 27.14 | 85.5 | 54.6   | 0.43 |
| 2019/9/13 8:00  | 27.15 | 84.5 | 331.5  | 0.46 |
| 2019/9/13 9:00  | 28.22 | 80.8 | 545    | 0.59 |
| 2019/9/13 10:00 | 28.05 | 80.4 | 701.8  | 0.59 |
| 2019/9/13 11:00 | 28.26 | 80.5 | 923    | 0.60 |
| 2019/9/13 12:00 | 28.5  | 78.7 | 1015.9 | 0.66 |
| 2019/9/13 13:00 | 28.66 | 79.7 | 898    | 0.63 |
| 2019/9/13 14:00 | 28.56 | 81   | 810.5  | 0.59 |
| 2019/9/13 15:00 | 28.86 | 77.3 | 797.7  | 0.71 |
| 2019/9/13 16:00 | 28.99 | 75.8 | 528.3  | 0.76 |
| 2019/9/13 17:00 | 28.99 | 76   | 320.5  | 0.75 |
| 2019/9/13 18:00 | 28.86 | 79.5 | 74.5   | 0.64 |
| 2019/9/13 19:00 | 26.37 | 84   | 1.7    | 0.46 |
| 2019/9/13 20:00 | 24.52 | 92.6 | -0.6   | 0.20 |
| 2019/9/13 21:00 | 24.33 | 91.7 | -0.4   | 0.22 |
| 2019/9/13 22:00 | 24.23 | 90.7 | -0.3   | 0.25 |
| 2019/9/13 23:00 | 24.19 | 89.9 | -0.6   | 0.27 |
| 2019/9/14 0:00  | 24    | 91   | -0.8   | 0.24 |
| 2019/9/14 1:00  | 23.64 | 93.1 | -0.7   | 0.18 |
| 2019/9/14 2:00  | 23.77 | 92.4 | -0.9   | 0.20 |
| 2019/9/14 3:00  | 24.24 | 89.2 | -0.9   | 0.29 |
| 2019/9/14 4:00  | 24.94 | 82.4 | -1.3   | 0.48 |
| 2019/9/14 5:00  | 25.2  | 84.2 | -0.9   | 0.44 |
| 2019/9/14 6:00  | 25.68 | 85.3 | 2      | 0.41 |
| 2019/9/14 7:00  | 25.48 | 86.7 | 85.9   | 0.37 |
| 2019/9/14 8:00  | 27.3  | 83.5 | 325.2  | 0.49 |
| 2019/9/14 9:00  | 27.82 | 81.6 | 617.8  | 0.55 |
| 2019/9/14 10:00 | 27.93 | 81.8 | 653.7  | 0.55 |
| 2019/9/14 11:00 | 27.83 | 82.6 | 796.5  | 0.52 |
| 2019/9/14 12:00 | 28.26 | 80.5 | 1041.1 | 0.60 |
| 2019/9/14 13:00 | 28.21 | 81.2 | 497.2  | 0.57 |
| 2019/9/14 14:00 | 28.09 | 81.2 | 310.2  | 0.57 |
| 2019/9/14 15:00 | 28.32 | 79.7 | 540.8  | 0.62 |
| 2019/9/14 16:00 | 28.57 | 78.2 | 567.4  | 0.67 |
| 2019/9/14 17:00 | 28.78 | 75.9 | 330    | 0.75 |
| 2019/9/14 18:00 | 28.74 | 75.7 | 86.8   | 0.75 |
| 2019/9/14 19:00 | 28.48 | 77.5 | 0.9    | 0.69 |
| 2019/9/14 20:00 | 25.8  | 86.4 | 0.4    | 0.38 |
| 2019/9/14 21:00 | 25.36 | 85.2 | -0.8   | 0.41 |
| 2019/9/14 22:00 | 25.69 | 85.1 | -0.9   | 0.42 |
| 2019/9/14 23:00 | 24.96 | 89.4 | -0.9   | 0.29 |

|                 |       |      |       |      |
|-----------------|-------|------|-------|------|
| 2019/9/15 0:00  | 24.65 | 89.7 | -0.8  | 0.28 |
| 2019/9/15 1:00  | 24.12 | 92   | -0.8  | 0.21 |
| 2019/9/15 2:00  | 23.51 | 94.6 | -0.8  | 0.14 |
| 2019/9/15 3:00  | 23.22 | 96.8 | -0.9  | 0.08 |
| 2019/9/15 4:00  | 23.15 | 97.3 | -0.8  | 0.07 |
| 2019/9/15 5:00  | 22.92 | 97.4 | -0.7  | 0.07 |
| 2019/9/15 6:00  | 22.76 | 97.3 | 0.8   | 0.07 |
| 2019/9/15 7:00  | 23.27 | 94.6 | 51.3  | 0.14 |
| 2019/9/15 8:00  | 24.13 | 91.1 | 175.1 | 0.24 |
| 2019/9/15 9:00  | 27.21 | 78.6 | 580.1 | 0.63 |
| 2019/9/15 10:00 | 28.69 | 75.7 | 743.8 | 0.75 |
| 2019/9/15 11:00 | 29.64 | 71.2 | 712.6 | 0.92 |
| 2019/9/15 12:00 | 29.74 | 73.1 | 612.4 | 0.86 |
| 2019/9/15 13:00 | 28.68 | 79   | 738.8 | 0.65 |
| 2019/9/15 14:00 | 28.44 | 77.1 | 691.8 | 0.70 |
| 2019/9/15 15:00 | 28.52 | 75.6 | 593.6 | 0.75 |
| 2019/9/15 16:00 | 28.4  | 77.7 | 460   | 0.68 |
| 2019/9/15 17:00 | 28.39 | 78.9 | 314   | 0.65 |
| 2019/9/15 18:00 | 28.28 | 77.7 | 75.2  | 0.68 |
| 2019/9/15 19:00 | 28.18 | 79.4 | 0.8   | 0.63 |
| 2019/9/15 20:00 | 28.17 | 80   | -1    | 0.61 |
| 2019/9/15 21:00 | 28.17 | 80.1 | -0.8  | 0.61 |
| 2019/9/15 22:00 | 28.3  | 80.4 | -0.9  | 0.60 |
| 2019/9/15 23:00 | 27.81 | 82.3 | -0.4  | 0.53 |
| 2019/9/16 0:00  | 26.67 | 87.7 | -0.6  | 0.36 |
| 2019/9/16 1:00  | 26.25 | 91.5 | -0.8  | 0.24 |
| 2019/9/16 2:00  | 26.16 | 92.6 | -0.7  | 0.21 |
| 2019/9/16 3:00  | 25.51 | 93.5 | -0.6  | 0.18 |
| 2019/9/16 4:00  | 25.06 | 95.3 | -0.7  | 0.13 |
| 2019/9/16 5:00  | 24.97 | 95.3 | -0.7  | 0.13 |
| 2019/9/16 6:00  | 24.96 | 94.6 | 3.7   | 0.15 |
| 2019/9/16 7:00  | 25.13 | 93.7 | 118.5 | 0.17 |
| 2019/9/16 8:00  | 26.66 | 87.5 | 281.7 | 0.36 |
| 2019/9/16 9:00  | 28.61 | 79.4 | 550   | 0.64 |
| 2019/9/16 10:00 | 29.55 | 73.8 | 691.5 | 0.83 |
| 2019/9/16 11:00 | 30.57 | 68   | 843   | 1.05 |
| 2019/9/16 12:00 | 31.68 | 61.6 | 941.3 | 1.30 |
| 2019/9/16 13:00 | 32.43 | 57.5 | 776.6 | 1.47 |
| 2019/9/16 14:00 | 31.73 | 64.8 | 307   | 1.19 |
| 2019/9/16 15:00 | 29.3  | 79.7 | 536.8 | 0.64 |
| 2019/9/16 16:00 | 29.18 | 81.3 | 476.5 | 0.59 |
| 2019/9/16 17:00 | 29.19 | 81   | 343.3 | 0.60 |



|                 |       |      |       |      |
|-----------------|-------|------|-------|------|
| 2019/9/16 18:00 | 28.92 | 84.1 | 83.7  | 0.50 |
| 2019/9/16 19:00 | 28.79 | 85.2 | -0.1  | 0.46 |
| 2019/9/16 20:00 | 28.88 | 85.1 | -0.7  | 0.46 |
| 2019/9/16 21:00 | 28.97 | 84.7 | -0.7  | 0.48 |
| 2019/9/16 22:00 | 28.88 | 84.8 | -0.5  | 0.47 |
| 2019/9/16 23:00 | 28.33 | 84.6 | -0.2  | 0.47 |
| 2019/9/17 0:00  | 27.38 | 83.5 | -0.2  | 0.49 |
| 2019/9/17 1:00  | 26.04 | 82.2 | -0.4  | 0.51 |
| 2019/9/17 2:00  | 25.65 | 88.2 | -0.7  | 0.33 |
| 2019/9/17 3:00  | 25.91 | 91.4 | -0.8  | 0.24 |
| 2019/9/17 4:00  | 25.66 | 93   | -0.8  | 0.20 |
| 2019/9/17 5:00  | 25.72 | 94   | -1.1  | 0.17 |
| 2019/9/17 6:00  | 25.51 | 95.1 | 2.5   | 0.14 |
| 2019/9/17 7:00  | 25.32 | 95.4 | 85.6  | 0.13 |
| 2019/9/17 8:00  | 26.9  | 89.6 | 332.9 | 0.30 |
| 2019/9/17 9:00  | 29.01 | 79.6 | 590.3 | 0.64 |
| 2019/9/17 10:00 | 30.47 | 70.6 | 768.8 | 0.96 |
| 2019/9/17 11:00 | 31.57 | 63.8 | 832.7 | 1.22 |
| 2019/9/17 12:00 | 32.55 | 57.7 | 851.2 | 1.46 |
| 2019/9/17 13:00 | 33.41 | 53.3 | 918.3 | 1.65 |
| 2019/9/17 14:00 | 30.42 | 77.8 | 578.9 | 0.72 |
| 2019/9/17 15:00 | 29.06 | 86.1 | 616   | 0.44 |
| 2019/9/17 16:00 | 29.08 | 85.1 | 476.7 | 0.47 |
| 2019/9/17 17:00 | 29.16 | 84.7 | 192.2 | 0.48 |
| 2019/9/17 18:00 | 29.09 | 86.3 | 56.4  | 0.43 |
| 2019/9/17 19:00 | 28.93 | 87   | -0.3  | 0.41 |
| 2019/9/17 20:00 | 28.91 | 85.2 | -0.8  | 0.46 |
| 2019/9/17 21:00 | 28.95 | 84.6 | -0.8  | 0.48 |
| 2019/9/17 22:00 | 28.71 | 85   | -0.7  | 0.46 |
| 2019/9/17 23:00 | 28.22 | 85.2 | -0.5  | 0.45 |
| 2019/9/18 0:00  | 27.47 | 87.9 | -0.6  | 0.36 |
| 2019/9/18 1:00  | 26.69 | 91.2 | -0.7  | 0.26 |
| 2019/9/18 2:00  | 26.37 | 91   | -0.8  | 0.26 |
| 2019/9/18 3:00  | 26.34 | 88.4 | -0.8  | 0.33 |
| 2019/9/18 4:00  | 25.92 | 90.2 | -0.7  | 0.28 |
| 2019/9/18 5:00  | 25.32 | 93.1 | -0.9  | 0.19 |
| 2019/9/18 6:00  | 25.04 | 94.9 | 1.1   | 0.14 |
| 2019/9/18 7:00  | 25.13 | 94.7 | 110   | 0.15 |
| 2019/9/18 8:00  | 26.92 | 87.5 | 339.6 | 0.37 |
| 2019/9/18 9:00  | 28.66 | 79.7 | 598   | 0.63 |
| 2019/9/18 10:00 | 30.21 | 71.8 | 780.7 | 0.91 |
| 2019/9/18 11:00 | 29.09 | 80.5 | 961.3 | 0.61 |

|                 |       |      |       |      |
|-----------------|-------|------|-------|------|
| 2019/9/18 12:00 | 28.58 | 82.8 | 995.8 | 0.53 |
| 2019/9/18 13:00 | 28.81 | 76.7 | 978.6 | 0.72 |
| 2019/9/18 14:00 | 28.76 | 77.8 | 908.4 | 0.69 |
| 2019/9/18 15:00 | 28.86 | 73.2 | 775.8 | 0.83 |
| 2019/9/18 16:00 | 29.06 | 69.4 | 566   | 0.96 |
| 2019/9/18 17:00 | 29.07 | 68.6 | 308.3 | 0.98 |
| 2019/9/18 18:00 | 28.76 | 76.4 | 78.4  | 0.73 |
| 2019/9/18 19:00 | 28.66 | 80.1 | -0.7  | 0.62 |
| 2019/9/18 20:00 | 28.74 | 79.4 | -1.2  | 0.64 |
| 2019/9/18 21:00 | 28.77 | 79.9 | -1.1  | 0.62 |
| 2019/9/18 22:00 | 28.61 | 82.1 | -1    | 0.55 |
| 2019/9/18 23:00 | 28    | 84.3 | -0.8  | 0.48 |
| 2019/9/19 0:00  | 26.45 | 89.2 | -0.9  | 0.31 |
| 2019/9/19 1:00  | 25.92 | 91.2 | -0.9  | 0.25 |
| 2019/9/19 2:00  | 25.66 | 92.3 | -0.9  | 0.22 |
| 2019/9/19 3:00  | 25.62 | 93.2 | -0.9  | 0.19 |
| 2019/9/19 4:00  | 25.27 | 94.7 | -0.9  | 0.15 |
| 2019/9/19 5:00  | 25.55 | 94   | -0.9  | 0.17 |
| 2019/9/19 6:00  | 25.6  | 92.7 | 2.6   | 0.20 |
| 2019/9/19 7:00  | 26.27 | 89   | 120.3 | 0.31 |
| 2019/9/19 8:00  | 27.25 | 83   | 350.8 | 0.50 |
| 2019/9/19 9:00  | 28.79 | 75.3 | 596.2 | 0.77 |
| 2019/9/19 10:00 | 29.36 | 73.1 | 807   | 0.85 |
| 2019/9/19 11:00 | 29.09 | 76   | 935   | 0.75 |
| 2019/9/19 12:00 | 28.97 | 76.4 | 988.4 | 0.74 |
| 2019/9/19 13:00 | 29.01 | 74.5 | 972.9 | 0.80 |
| 2019/9/19 14:00 | 29.05 | 75.1 | 888.4 | 0.78 |
| 2019/9/19 15:00 | 29.12 | 76.4 | 741.1 | 0.74 |
| 2019/9/19 16:00 | 29.3  | 74.8 | 529.9 | 0.80 |
| 2019/9/19 17:00 | 29.29 | 76   | 287   | 0.76 |
| 2019/9/19 18:00 | 29.1  | 79.2 | 65.3  | 0.65 |
| 2019/9/19 19:00 | 29.06 | 79.4 | -0.5  | 0.65 |
| 2019/9/19 20:00 | 29.07 | 77.6 | -0.9  | 0.70 |
| 2019/9/19 21:00 | 28.86 | 78.1 | -0.8  | 0.68 |
| 2019/9/19 22:00 | 28.47 | 80.9 | -0.8  | 0.59 |
| 2019/9/19 23:00 | 27.9  | 80.4 | -0.9  | 0.59 |
| 2019/9/20 0:00  | 27.05 | 84.6 | -0.7  | 0.45 |
| 2019/9/20 1:00  | 26.17 | 86.5 | -0.8  | 0.38 |
| 2019/9/20 2:00  | 25.27 | 90   | -0.8  | 0.28 |
| 2019/9/20 3:00  | 24.86 | 91.5 | -1.1  | 0.23 |
| 2019/9/20 4:00  | 25.07 | 90.5 | -1.1  | 0.26 |
| 2019/9/20 5:00  | 25.4  | 87.9 | -1.1  | 0.34 |

|                 |       |      |       |      |
|-----------------|-------|------|-------|------|
| 2019/9/20 6:00  | 25.86 | 84.2 | 1.8   | 0.45 |
| 2019/9/20 7:00  | 26    | 83.9 | 105.9 | 0.46 |
| 2019/9/20 8:00  | 27.04 | 80.4 | 328.5 | 0.58 |
| 2019/9/20 9:00  | 28.7  | 72.9 | 574.4 | 0.84 |
| 2019/9/20 10:00 | 29.13 | 69.9 | 786.2 | 0.94 |
| 2019/9/20 11:00 | 28.7  | 74.4 | 926.8 | 0.79 |
| 2019/9/20 12:00 | 28.81 | 70.7 | 982.3 | 0.91 |
| 2019/9/20 13:00 | 28.71 | 73.1 | 971.7 | 0.83 |
| 2019/9/20 14:00 | 28.55 | 75.3 | 893.8 | 0.76 |
| 2019/9/20 15:00 | 28.33 | 78.6 | 752.6 | 0.66 |
| 2019/9/20 16:00 | 28.61 | 71.9 | 542.3 | 0.87 |
| 2019/9/20 17:00 | 28.62 | 72.7 | 299.7 | 0.84 |
| 2019/9/20 18:00 | 28.51 | 76.2 | 73.4  | 0.73 |
| 2019/9/20 19:00 | 28.4  | 76.7 | -0.4  | 0.71 |
| 2019/9/20 20:00 | 28.41 | 76   | -1    | 0.74 |
| 2019/9/20 21:00 | 28.43 | 74.9 | -0.8  | 0.77 |
| 2019/9/20 22:00 | 28.16 | 76.9 | -0.8  | 0.70 |
| 2019/9/20 23:00 | 27.29 | 77.6 | -0.9  | 0.66 |
| 2019/9/21 0:00  | 26.52 | 81   | -1.1  | 0.55 |
| 2019/9/21 1:00  | 26.2  | 83.8 | -0.9  | 0.46 |
| 2019/9/21 2:00  | 26.08 | 85.3 | -1.1  | 0.42 |
| 2019/9/21 3:00  | 26    | 86.8 | -0.9  | 0.37 |
| 2019/9/21 4:00  | 25.43 | 89   | -1    | 0.31 |
| 2019/9/21 5:00  | 25.67 | 87.3 | -0.9  | 0.36 |
| 2019/9/21 6:00  | 25.56 | 87.4 | 1.9   | 0.35 |
| 2019/9/21 7:00  | 25.81 | 85.8 | 114.1 | 0.40 |
| 2019/9/21 8:00  | 27.09 | 79.8 | 335.7 | 0.59 |
| 2019/9/21 9:00  | 28.32 | 75.4 | 585.1 | 0.75 |
| 2019/9/21 10:00 | 28.25 | 80.9 | 803.1 | 0.58 |
| 2019/9/21 11:00 | 27.97 | 83.7 | 940.5 | 0.49 |
| 2019/9/21 12:00 | 28.11 | 84.1 | 986.5 | 0.48 |
| 2019/9/21 13:00 | 28.29 | 82.2 | 890.5 | 0.54 |
| 2019/9/21 14:00 | 28.45 | 82.1 | 862.3 | 0.55 |
| 2019/9/21 15:00 | 28.47 | 83.4 | 726.3 | 0.51 |
| 2019/9/21 16:00 | 28.64 | 82.1 | 531.1 | 0.55 |
| 2019/9/21 17:00 | 28.69 | 82.1 | 276.6 | 0.55 |
| 2019/9/21 18:00 | 28.74 | 81.4 | 47.2  | 0.58 |
| 2019/9/21 19:00 | 28.72 | 82.4 | -0.1  | 0.55 |
| 2019/9/21 20:00 | 28.67 | 81.2 | -0.8  | 0.58 |
| 2019/9/21 21:00 | 28.4  | 82.6 | -0.8  | 0.53 |
| 2019/9/21 22:00 | 28.23 | 84.8 | -0.8  | 0.46 |
| 2019/9/21 23:00 | 27.82 | 87.7 | -0.8  | 0.37 |

|                 |       |      |       |      |
|-----------------|-------|------|-------|------|
| 2019/9/22 0:00  | 27.48 | 88.8 | -0.9  | 0.33 |
| 2019/9/22 1:00  | 27.26 | 89.1 | -0.8  | 0.32 |
| 2019/9/22 2:00  | 26.59 | 90   | -0.7  | 0.29 |
| 2019/9/22 3:00  | 25.84 | 92.6 | -0.8  | 0.21 |
| 2019/9/22 4:00  | 25.5  | 93.1 | -1    | 0.19 |
| 2019/9/22 5:00  | 25.72 | 91.9 | -0.8  | 0.23 |
| 2019/9/22 6:00  | 25.66 | 91   | 2     | 0.25 |
| 2019/9/22 7:00  | 26.11 | 88.8 | 115   | 0.32 |
| 2019/9/22 8:00  | 27.39 | 83   | 335.7 | 0.51 |
| 2019/9/22 9:00  | 29.03 | 73.6 | 563.3 | 0.83 |
| 2019/9/22 10:00 | 29.52 | 72.3 | 660.9 | 0.88 |
| 2019/9/22 11:00 | 28.45 | 83.5 | 937.3 | 0.51 |
| 2019/9/22 12:00 | 28.04 | 85.7 | 878.6 | 0.43 |
| 2019/9/22 13:00 | 28    | 84.3 | 233.8 | 0.48 |
| 2019/9/22 14:00 | 28.18 | 82.4 | 363.6 | 0.54 |
| 2019/9/22 15:00 | 28.32 | 83.5 | 685.8 | 0.51 |
| 2019/9/22 16:00 | 28.43 | 85   | 525.6 | 0.46 |
| 2019/9/22 17:00 | 28.55 | 83   | 289.5 | 0.52 |
| 2019/9/22 18:00 | 28.54 | 83.9 | 106.9 | 0.50 |
| 2019/9/22 19:00 | 28.53 | 83.1 | 0.9   | 0.52 |
| 2019/9/22 20:00 | 28.44 | 84.2 | -0.5  | 0.49 |
| 2019/9/22 21:00 | 28.31 | 84.2 | -0.5  | 0.48 |
| 2019/9/22 22:00 | 28.29 | 84.4 | -0.2  | 0.48 |
| 2019/9/22 23:00 | 27.24 | 88.9 | -0.5  | 0.33 |
| 2019/9/23 0:00  | 27    | 89.7 | -0.7  | 0.30 |
| 2019/9/23 1:00  | 26.37 | 92.3 | -0.9  | 0.22 |
| 2019/9/23 2:00  | 26.3  | 92.9 | -1    | 0.20 |
| 2019/9/23 3:00  | 26.02 | 94.2 | -0.9  | 0.16 |
| 2019/9/23 4:00  | 25.85 | 95.3 | -1    | 0.13 |
| 2019/9/23 5:00  | 25.93 | 94.4 | -0.9  | 0.16 |
| 2019/9/23 6:00  | 26.08 | 92.1 | 2.1   | 0.22 |
| 2019/9/23 7:00  | 26.29 | 91.6 | 110.6 | 0.24 |
| 2019/9/23 8:00  | 27.67 | 86.5 | 324.9 | 0.40 |
| 2019/9/23 9:00  | 28.13 | 84.6 | 283.9 | 0.47 |
| 2019/9/23 10:00 | 28.43 | 83.1 | 801.3 | 0.52 |
| 2019/9/23 11:00 | 28.4  | 83.1 | 879.6 | 0.52 |
| 2019/9/23 12:00 | 28.32 | 84.4 | 974.3 | 0.48 |
| 2019/9/23 13:00 | 28.42 | 83.4 | 997.9 | 0.51 |
| 2019/9/23 14:00 | 28.55 | 82.4 | 869.8 | 0.54 |
| 2019/9/23 15:00 | 28.4  | 86   | 725.3 | 0.43 |
| 2019/9/23 16:00 | 28.52 | 84.2 | 419.1 | 0.49 |
| 2019/9/23 17:00 | 28.63 | 81.9 | 288.5 | 0.56 |

|                 |       |      |       |      |
|-----------------|-------|------|-------|------|
| 2019/9/23 18:00 | 28.28 | 82.8 | 58.9  | 0.53 |
| 2019/9/23 19:00 | 27.9  | 84   | -0.4  | 0.48 |
| 2019/9/23 20:00 | 27.9  | 84   | -0.8  | 0.48 |
| 2019/9/23 21:00 | 27.99 | 82.7 | -0.7  | 0.52 |
| 2019/9/23 22:00 | 27.94 | 84   | -0.7  | 0.48 |
| 2019/9/23 23:00 | 27.99 | 83.2 | -0.6  | 0.51 |
| 2019/9/24 0:00  | 27.52 | 87.5 | -0.3  | 0.37 |
| 2019/9/24 1:00  | 27.22 | 88.9 | -0.8  | 0.33 |
| 2019/9/24 2:00  | 26.82 | 91   | -0.6  | 0.26 |
| 2019/9/24 3:00  | 26.5  | 92.1 | -1    | 0.23 |
| 2019/9/24 4:00  | 26.43 | 92.4 | -0.7  | 0.22 |
| 2019/9/24 5:00  | 26.23 | 93.8 | -0.6  | 0.18 |
| 2019/9/24 6:00  | 25.68 | 92.9 | 1.1   | 0.20 |
| 2019/9/24 7:00  | 26.29 | 89.2 | 55.3  | 0.31 |
| 2019/9/24 8:00  | 27.15 | 89.6 | 225.5 | 0.31 |
| 2019/9/24 9:00  | 27.56 | 88   | 376.9 | 0.36 |
| 2019/9/24 10:00 | 27.41 | 89.3 | 512.3 | 0.32 |
| 2019/9/24 11:00 | 27.26 | 89.4 | 812.4 | 0.31 |
| 2019/9/24 12:00 | 27.65 | 86.9 | 999.2 | 0.39 |
| 2019/9/24 13:00 | 27.9  | 85.6 | 994.6 | 0.43 |
| 2019/9/24 14:00 | 27.6  | 86.6 | 879.6 | 0.40 |
| 2019/9/24 15:00 | 27.63 | 85.9 | 784.6 | 0.42 |
| 2019/9/24 16:00 | 27.6  | 85.3 | 603.4 | 0.44 |
| 2019/9/24 17:00 | 27.64 | 87.6 | 318.1 | 0.37 |
| 2019/9/24 18:00 | 27.72 | 89.3 | 50.3  | 0.32 |
| 2019/9/24 19:00 | 27.88 | 88   | -0.4  | 0.36 |
| 2019/9/24 20:00 | 28.01 | 87.4 | -0.7  | 0.38 |
| 2019/9/24 21:00 | 28.31 | 86.7 | -0.3  | 0.41 |
| 2019/9/24 22:00 | 27.57 | 88.3 | -0.5  | 0.35 |
| 2019/9/24 23:00 | 27.14 | 89.1 | -0.6  | 0.32 |
| 2019/9/25 0:00  | 26.78 | 90.6 | -0.4  | 0.27 |
| 2019/9/25 1:00  | 26.49 | 90.6 | -0.6  | 0.27 |
| 2019/9/25 2:00  | 26.1  | 92.5 | -0.8  | 0.21 |
| 2019/9/25 3:00  | 25.98 | 93.6 | -0.4  | 0.18 |
| 2019/9/25 4:00  | 26    | 94   | -0.3  | 0.17 |
| 2019/9/25 5:00  | 25.84 | 94.8 | -0.1  | 0.15 |
| 2019/9/25 6:00  | 25.52 | 96.7 | 0.1   | 0.09 |
| 2019/9/25 7:00  | 25.43 | 97.5 | 23.1  | 0.07 |
| 2019/9/25 8:00  | 25.66 | 97.3 | 93.2  | 0.08 |
| 2019/9/25 9:00  | 26.53 | 91.8 | 263.1 | 0.24 |
| 2019/9/25 10:00 | 27.66 | 86.1 | 768.7 | 0.42 |
| 2019/9/25 11:00 | 27.89 | 85.4 | 906.2 | 0.44 |

|                 |       |      |       |      |     |
|-----------------|-------|------|-------|------|-----|
| 2019/9/25 12:00 | 27.88 | 85.9 | 669.3 | 0.43 |     |
| 2019/9/25 13:00 | 27.81 | 86.2 | 341.8 | 0.42 |     |
| 2019/9/25 14:00 | 27.65 | 87.3 | 288   | 0.38 |     |
| 2019/9/25 15:00 | 27.83 | 85.2 | 599.4 | 0.45 |     |
| 2019/9/25 16:00 | 27.87 | 85.9 | 151.2 | 0.43 |     |
| 2019/9/25 17:00 | 27.97 | 85.5 | 70.3  | 0.44 |     |
| 2019/9/25 18:00 | 28.05 | 85   | 40.1  | 0.46 |     |
| 2019/9/25 19:00 | 28.17 | 86.2 | -0.2  | 0.42 |     |
| 2019/9/25 20:00 | 27.92 | 87.7 | -0.8  | 0.37 |     |
| 2019/9/25 21:00 | 27.76 | 87.9 | -0.7  | 0.36 |     |
| 2019/9/25 22:00 | 27.47 | 89.2 | -0.6  | 0.32 |     |
| 2019/9/25 23:00 | 27.56 | 89.2 | -0.2  | 0.32 |     |
| 2019/9/26 0:00  | 27.29 | 87.8 | -0.2  | 0.36 |     |
| 2019/9/26 1:00  | 26.95 | 88.4 | -0.4  | 0.34 |     |
| 2019/9/26 2:00  | 26.52 | 91   | -0.4  | 0.26 |     |
| 2019/9/26 3:00  | 25.97 | 94.4 | -0.6  | 0.16 |     |
| 2019/9/26 4:00  | 25.58 | 96.4 | -0.8  | 0.10 |     |
| 2019/9/26 5:00  | 25.43 | 96.1 | -0.4  | 0.11 |     |
| 2019/9/26 6:00  | 25.44 | 96.3 | 1     | 0.10 |     |
| 2019/9/26 7:00  | 25.65 | 96.6 | 18.6  | 0.10 |     |
| 2019/9/26 8:00  | 25.75 | 96   | 91.4  | 0.11 |     |
| 2019/9/26 9:00  | 25.91 | 94.4 | 200.6 | 0.16 |     |
| 2019/9/26 10:00 | 27.15 | 88.2 | 451.5 | 0.35 |     |
| 2019/9/26 11:00 | 28.26 | 84.7 | 718.7 | 0.47 |     |
| 2019/9/26 12:00 | 28.21 | 85.8 | 915.9 | 0.43 |     |
| 2019/9/26 13:00 | 28.55 | 84   | 744.1 | 0.49 | 5   |
| 2019/9/26 14:00 | 28.51 | 85.2 | 796.7 | 0.46 | 5   |
| 2019/9/26 15:00 | 28.61 | 84.7 | 322.6 | 0.47 | 5.1 |
| 2019/9/26 16:00 | 28.78 | 83.1 | 402.5 | 0.52 | 5.1 |
| 2019/9/26 17:00 | 28.61 | 84.2 | 223   | 0.49 | 5.1 |
| 2019/9/26 18:00 | 28.45 | 85   | 42    | 0.46 | 5.1 |
| 2019/9/26 19:00 | 28.31 | 84.1 | 0.1   | 0.49 | 5.1 |
| 2019/9/26 20:00 | 28.21 | 82.7 | -0.4  | 0.53 | 5.1 |
| 2019/9/26 21:00 | 27.97 | 82.1 | -0.3  | 0.54 | 5.1 |
| 2019/9/26 22:00 | 27.36 | 84.9 | -0.1  | 0.45 | 5.1 |
| 2019/9/26 23:00 | 26.44 | 90.5 | -0.2  | 0.27 | 5.1 |
| 2019/9/27 0:00  | 26.04 | 94.1 | -0.7  | 0.17 | 5.1 |
| 2019/9/27 1:00  | 25.96 | 92.1 | -0.7  | 0.22 | 5.2 |
| 2019/9/27 2:00  | 25.93 | 89.6 | -0.2  | 0.29 | 5.2 |
| 2019/9/27 3:00  | 25.51 | 90   | -0.2  | 0.28 | 5.2 |
| 2019/9/27 4:00  | 25.73 | 86.8 | -0.4  | 0.37 | 5.2 |
| 2019/9/27 5:00  | 25.33 | 89.1 | -0.4  | 0.30 | 5.3 |

---

|                 |       |      |       |      |     |
|-----------------|-------|------|-------|------|-----|
| 2019/9/27 6:00  | 24.93 | 91.1 | 1     | 0.24 | 5.3 |
| 2019/9/27 7:00  | 24.93 | 89.9 | 55.6  | 0.28 | 5.3 |
| 2019/9/27 8:00  | 26.26 | 82.9 | 248.8 | 0.49 | 5.3 |
| 2019/9/27 9:00  | 27.53 | 80.4 | 406   | 0.58 | 5.3 |
| 2019/9/27 10:00 | 28.22 | 79.7 | 584.4 | 0.62 | 5.3 |
| 2019/9/27 11:00 | 29.83 | 73.7 | 746.6 | 0.84 | 5.3 |
| 2019/9/27 12:00 | 31.32 | 64.2 | 721.8 | 1.20 | 5.3 |
| 2019/9/27 13:00 | 30.85 | 70   | 834.1 | 0.99 | 5.4 |
| 2019/9/27 14:00 | 28.75 | 82.6 | 858.1 | 0.54 | 5.4 |
| 2019/9/27 15:00 | 28.52 | 81.4 | 724.5 | 0.57 | 5.4 |
| 2019/9/27 16:00 | 28.7  | 77.6 | 505.3 | 0.69 | 5.4 |
| 2019/9/27 17:00 | 28.54 | 78.4 | 256.9 | 0.67 | 5.4 |
| 2019/9/27 18:00 | 28.54 | 76.6 | 49.5  | 0.72 | 5.4 |
| 2019/9/27 19:00 | 28.52 | 76.2 | -0.8  | 0.73 | 5.4 |
| 2019/9/27 20:00 | 28.44 | 78.4 | -0.7  | 0.66 | 5.4 |
| 2019/9/27 21:00 | 28.22 | 82.2 | -0.7  | 0.54 | 5.4 |
| 2019/9/27 22:00 | 27.69 | 86.1 | -0.7  | 0.42 | 5.4 |
| 2019/9/27 23:00 | 27.18 | 85.3 | -0.6  | 0.43 | 5.4 |
| 2019/9/28 0:00  | 26.41 | 87.5 | -0.7  | 0.36 | 5.4 |
| 2019/9/28 1:00  | 25.69 | 89.8 | -0.9  | 0.29 | 5.3 |
| 2019/9/28 2:00  | 25.38 | 90.3 | -1    | 0.27 | 5.3 |
| 2019/9/28 3:00  | 24.99 | 92.4 | -1    | 0.21 | 5.3 |
| 2019/9/28 4:00  | 24.68 | 90.6 | -1.1  | 0.25 | 5.3 |
| 2019/9/28 5:00  | 24.23 | 90.2 | -0.8  | 0.26 | 5.3 |
| 2019/9/28 6:00  | 23.95 | 91.1 | 1.4   | 0.23 | 5.3 |
| 2019/9/28 7:00  | 24.41 | 89.4 | 108.8 | 0.28 | 5.3 |
| 2019/9/28 8:00  | 26.49 | 84   | 336.2 | 0.46 | 5.3 |
| 2019/9/28 9:00  | 28.51 | 79.6 | 575.1 | 0.63 | 5.3 |
| 2019/9/28 10:00 | 28.86 | 82.4 | 786.2 | 0.55 | 5.4 |
| 2019/9/28 11:00 | 28.27 | 87.6 | 921.9 | 0.38 | 5.4 |
| 2019/9/28 12:00 | 28.87 | 85.3 | 970.9 | 0.46 | 5.4 |
| 2019/9/28 13:00 | 32.69 | 57.7 | 884.7 | 1.47 | 5.4 |
| 2019/9/28 14:00 | 28.61 | 86.4 | 806.6 | 0.42 | 5.4 |
| 2019/9/28 15:00 | 28.62 | 85.7 | 322.9 | 0.44 | 5.4 |
| 2019/9/28 16:00 | 28.71 | 85.7 | 274.4 | 0.44 | 5.4 |
| 2019/9/28 17:00 | 28.81 | 85.5 | 219.7 | 0.45 | 5.4 |
| 2019/9/28 18:00 | 28.97 | 85.8 | 34.3  | 0.44 | 5.4 |
| 2019/9/28 19:00 | 28.82 | 87.2 | -0.4  | 0.40 | 5.4 |
| 2019/9/28 20:00 | 28.97 | 89   | -0.8  | 0.34 | 5.4 |
| 2019/9/28 21:00 | 28.95 | 84.6 | -0.6  | 0.48 | 5.4 |
| 2019/9/28 22:00 | 28.66 | 82.6 | -0.7  | 0.54 | 5.4 |
| 2019/9/28 23:00 | 27.91 | 85.2 | -0.7  | 0.45 | 5.4 |

|                 |       |      |       |      |     |
|-----------------|-------|------|-------|------|-----|
| 2019/9/29 0:00  | 27.25 | 87.6 | -0.7  | 0.37 | 5.4 |
| 2019/9/29 1:00  | 26.75 | 90.2 | -0.8  | 0.29 | 5.4 |
| 2019/9/29 2:00  | 26.38 | 92.4 | -0.8  | 0.22 | 5.4 |
| 2019/9/29 3:00  | 25.91 | 94.2 | -1    | 0.16 | 5.4 |
| 2019/9/29 4:00  | 25.86 | 95   | -1    | 0.14 | 5.4 |
| 2019/9/29 5:00  | 25.72 | 96   | -0.9  | 0.11 | 5.4 |
| 2019/9/29 6:00  | 25.43 | 97   | 1.2   | 0.08 | 5.4 |
| 2019/9/29 7:00  | 25.51 | 97   | 110.6 | 0.08 | 5.4 |
| 2019/9/29 8:00  | 27.11 | 90.4 | 330.1 | 0.28 | 5.3 |
| 2019/9/29 9:00  | 29.12 | 80.4 | 511.3 | 0.62 | 5.3 |
| 2019/9/29 10:00 | 30.7  | 70.8 | 616.6 | 0.96 | 5.3 |
| 2019/9/29 11:00 | 31.82 | 64.6 | 631.6 | 1.20 | 5.3 |
| 2019/9/29 12:00 | 32.18 | 63.9 | 795.2 | 1.24 | 5.3 |
| 2019/9/29 13:00 | 28.59 | 88.7 | 934.9 | 0.35 | 5.4 |
| 2019/9/29 14:00 | 28.38 | 89.4 | 766.1 | 0.33 | 5.4 |
| 2019/9/29 15:00 | 28.38 | 89.9 | 663.7 | 0.31 | 5.4 |
| 2019/9/29 16:00 | 28.61 | 88.5 | 515.6 | 0.36 | 5.4 |
| 2019/9/29 17:00 | 28.89 | 85.9 | 215.9 | 0.44 | 6.6 |
| 2019/9/29 18:00 | 28.78 | 86.6 | 29.1  | 0.42 | 6.9 |
| 2019/9/29 19:00 | 28.73 | 85.9 | -0.6  | 0.44 | 7   |
| 2019/9/29 20:00 | 28.83 | 83.5 | -0.7  | 0.51 | 7   |
| 2019/9/29 21:00 | 28.69 | 85.1 | -0.7  | 0.46 | 7   |
| 2019/9/29 22:00 | 28.33 | 87.2 | -0.7  | 0.39 | 7   |
| 2019/9/29 23:00 | 28.21 | 87.9 | -0.7  | 0.37 | 7   |
| 2019/9/30 0:00  | 27.72 | 86.9 | -0.6  | 0.39 | 7   |
| 2019/9/30 1:00  | 27.24 | 88.5 | -0.7  | 0.34 | 7   |
| 2019/9/30 2:00  | 26.92 | 89.9 | -0.7  | 0.30 | 7   |
| 2019/9/30 3:00  | 26.47 | 92.2 | -0.6  | 0.22 | 7   |
| 2019/9/30 4:00  | 26.31 | 93.2 | -0.7  | 0.19 | 7   |
| 2019/9/30 5:00  | 26.08 | 94.5 | -1    | 0.16 | 6.9 |
| 2019/9/30 6:00  | 25.85 | 95.3 | 0.6   | 0.13 | 6.9 |
| 2019/9/30 7:00  | 25.89 | 95.4 | 92.3  | 0.13 | 6.9 |
| 2019/9/30 8:00  | 27.06 | 89.3 | 296.7 | 0.31 | 6.9 |
| 2019/9/30 9:00  | 28.09 | 83.3 | 517.8 | 0.51 | 6.9 |
| 2019/9/30 10:00 | 28.48 | 81.9 | 734.7 | 0.56 | 6.9 |
| 2019/9/30 11:00 | 28.06 | 86.9 | 919   | 0.40 | 6.9 |
| 2019/9/30 12:00 | 28.08 | 83.7 | 970.5 | 0.50 | 6.9 |
| 2019/9/30 13:00 | 28.24 | 80.8 | 943.8 | 0.59 | 6.9 |
| 2019/9/30 14:00 | 28.26 | 81.2 | 864.4 | 0.57 | 8.8 |
| 2019/9/30 15:00 | 28.31 | 81   | 722.3 | 0.58 | 8.8 |
| 2019/9/30 16:00 | 28.15 | 81.4 | 507.7 | 0.57 | 8.8 |
| 2019/9/30 17:00 | 28.14 | 78.6 | 261.5 | 0.65 | 8.8 |



|                 |       |      |       |      |      |
|-----------------|-------|------|-------|------|------|
| 2019/9/30 18:00 | 27.95 | 80.1 | 47.3  | 0.60 | 8.8  |
| 2019/9/30 19:00 | 27.86 | 80.8 | -0.8  | 0.58 | 8.7  |
| 2019/9/30 20:00 | 28    | 80.3 | -1    | 0.60 | 8.7  |
| 2019/9/30 21:00 | 28.21 | 79.9 | -1    | 0.61 | 8.7  |
| 2019/9/30 22:00 | 27.9  | 82.8 | -0.7  | 0.52 | 8.7  |
| 2019/9/30 23:00 | 27.24 | 82.8 | -0.8  | 0.51 | 8.7  |
| 2019/10/1 0:00  | 26.5  | 84.6 | -0.8  | 0.44 | 8.7  |
| 2019/10/1 1:00  | 25.51 | 87.9 | -0.8  | 0.34 | 8.6  |
| 2019/10/1 2:00  | 24.82 | 90.5 | -1    | 0.26 | 8.6  |
| 2019/10/1 3:00  | 24.5  | 90.6 | -1.1  | 0.25 | 8.6  |
| 2019/10/1 4:00  | 24.44 | 90.4 | -1.2  | 0.26 | 8.6  |
| 2019/10/1 5:00  | 24.98 | 89.1 | -1.5  | 0.30 | 8.6  |
| 2019/10/1 6:00  | 25.29 | 88.2 | 0.7   | 0.33 | 8.6  |
| 2019/10/1 7:00  | 25.96 | 86.8 | 101.3 | 0.37 | 8.6  |
| 2019/10/1 8:00  | 27.42 | 83.2 | 302.1 | 0.50 | 8.5  |
| 2019/10/1 9:00  | 27.51 | 83.8 | 511.8 | 0.48 | 8.5  |
| 2019/10/1 10:00 | 27.73 | 84.5 | 780.2 | 0.47 | 8.6  |
| 2019/10/1 11:00 | 28.09 | 81.8 | 920.4 | 0.55 | 8.5  |
| 2019/10/1 12:00 | 28.31 | 79.6 | 993.5 | 0.62 | 8.5  |
| 2019/10/1 13:00 | 28.38 | 79.8 | 960.3 | 0.62 | 9.2  |
| 2019/10/1 14:00 | 28.38 | 79.5 | 867.6 | 0.63 | 9.6  |
| 2019/10/1 15:00 | 28.28 | 81.4 | 738.7 | 0.57 | 10.5 |
| 2019/10/1 16:00 | 28.39 | 80.9 | 513.3 | 0.59 | 10.8 |
| 2019/10/1 17:00 | 28.41 | 79   | 257.1 | 0.64 | 10.8 |
| 2019/10/1 18:00 | 28.3  | 80   | 43.8  | 0.61 | 10.8 |
| 2019/10/1 19:00 | 28.11 | 82.7 | -0.8  | 0.53 | 10.8 |
| 2019/10/1 20:00 | 28.13 | 78.3 | -1    | 0.66 | 10.7 |
| 2019/10/1 21:00 | 28.11 | 74.3 | -1    | 0.78 | 10.7 |
| 2019/10/1 22:00 | 27.77 | 78.2 | -0.8  | 0.66 | 10.6 |
| 2019/10/1 23:00 | 27.29 | 80.6 | -0.8  | 0.57 | 10.6 |
| 2019/10/2 0:00  | 26.48 | 84.1 | -1    | 0.46 | 10.6 |
| 2019/10/2 1:00  | 25.82 | 86.3 | -1    | 0.39 | 10.5 |
| 2019/10/2 2:00  | 25.25 | 88.7 | -1.1  | 0.31 | 10.5 |
| 2019/10/2 3:00  | 26.14 | 87   | -1.5  | 0.37 | 10.4 |
| 2019/10/2 4:00  | 27.28 | 83.6 | -0.9  | 0.49 | 10.4 |
| 2019/10/2 5:00  | 27.22 | 84.2 | -0.7  | 0.47 | 10.3 |
| 2019/10/2 6:00  | 27.31 | 83.7 | 1.1   | 0.48 | 10.3 |
| 2019/10/2 7:00  | 27.43 | 82.8 | 86.8  | 0.51 | 10.3 |
| 2019/10/2 8:00  | 27.7  | 81.1 | 313.3 | 0.57 | 10.2 |
| 2019/10/2 9:00  | 27.93 | 80   | 536.4 | 0.60 | 10.2 |
| 2019/10/2 10:00 | 27.77 | 82.8 | 765.2 | 0.52 | 10.2 |
| 2019/10/2 11:00 | 27.76 | 83.7 | 883.4 | 0.49 | 10.2 |

---

|                 |       |      |       |      |      |
|-----------------|-------|------|-------|------|------|
| 2019/10/2 12:00 | 27.87 | 83.3 | 968.8 | 0.50 | 10.2 |
| 2019/10/2 13:00 | 27.99 | 82.7 | 947.3 | 0.52 | 10.1 |
| 2019/10/2 14:00 | 27.94 | 84.4 | 509.4 | 0.47 | 10.2 |
| 2019/10/2 15:00 | 27.91 | 84.9 | 227   | 0.46 | 15.1 |
| 2019/10/2 16:00 | 28.04 | 82.2 | 361.1 | 0.54 | 14.9 |
| 2019/10/2 17:00 | 28.23 | 80.6 | 239.6 | 0.59 | 14.7 |
| 2019/10/2 18:00 | 28.08 | 83.5 | 40.6  | 0.50 | 14.4 |
| 2019/10/2 19:00 | 28.03 | 84.3 | -0.8  | 0.48 | 14.2 |
| 2019/10/2 20:00 | 28.05 | 84.2 | -0.7  | 0.48 | 14.1 |
| 2019/10/2 21:00 | 28.1  | 83   | -0.6  | 0.52 | 13.9 |
| 2019/10/2 22:00 | 28.04 | 83.2 | -0.8  | 0.51 | 13.8 |
| 2019/10/2 23:00 | 27.67 | 84   | -0.7  | 0.48 | 13.7 |
| 2019/10/3 0:00  | 26.88 | 87.8 | -0.9  | 0.36 | 13.6 |
| 2019/10/3 1:00  | 26.23 | 90.2 | -1.1  | 0.28 | 13.5 |
| 2019/10/3 2:00  | 26.42 | 90.1 | -1.3  | 0.28 | 13.4 |
| 2019/10/3 3:00  | 26.5  | 89.3 | -1    | 0.31 | 13.3 |
| 2019/10/3 4:00  | 26.09 | 90.6 | -0.9  | 0.27 | 13.2 |
| 2019/10/3 5:00  | 26.04 | 90.9 | -1.1  | 0.26 | 13.1 |
| 2019/10/3 6:00  | 26.33 | 90.1 | 0.2   | 0.28 | 13   |
| 2019/10/3 7:00  | 27.07 | 87.6 | 68.4  | 0.36 | 12.9 |
| 2019/10/3 8:00  | 27.45 | 85.4 | 289.7 | 0.43 | 12.9 |
| 2019/10/3 9:00  | 27.78 | 84.6 | 567.5 | 0.46 | 12.9 |
| 2019/10/3 10:00 | 27.82 | 85.2 | 763.9 | 0.45 | 12.8 |
| 2019/10/3 11:00 | 27.8  | 85.1 | 909.3 | 0.45 | 12.7 |
| 2019/10/3 12:00 | 27.86 | 85.5 | 955.6 | 0.44 | 12.6 |
| 2019/10/3 13:00 | 27.88 | 85.4 | 920.9 | 0.44 | 12.5 |
| 2019/10/3 14:00 | 28.02 | 84.3 | 841.8 | 0.48 | 12.4 |
| 2019/10/3 15:00 | 28.18 | 83   | 696.3 | 0.52 | 12.2 |
| 2019/10/3 16:00 | 28.16 | 84.9 | 470.6 | 0.46 | 12.1 |
| 2019/10/3 17:00 | 28.29 | 83.8 | 253.8 | 0.50 | 12   |
| 2019/10/3 18:00 | 28.23 | 84.6 | 36.6  | 0.47 | 11.9 |
| 2019/10/3 19:00 | 28.19 | 84.9 | -0.8  | 0.46 | 11.8 |
| 2019/10/3 20:00 | 28.17 | 83.8 | -0.9  | 0.49 | 11.7 |
| 2019/10/3 21:00 | 28.18 | 83.9 | -1    | 0.49 | 11.6 |
| 2019/10/3 22:00 | 28.16 | 84.1 | -1    | 0.48 | 11.6 |
| 2019/10/3 23:00 | 28.19 | 83.7 | -0.8  | 0.50 | 11.6 |
| 2019/10/4 0:00  | 27.84 | 85.6 | -0.6  | 0.43 | 11.5 |
| 2019/10/4 1:00  | 27.22 | 87.7 | -0.5  | 0.36 | 11.5 |
| 2019/10/4 2:00  | 26.28 | 90.9 | -0.7  | 0.26 | 11.4 |
| 2019/10/4 3:00  | 25.48 | 93.5 | -0.9  | 0.18 | 11.4 |
| 2019/10/4 4:00  | 25.32 | 94.7 | -0.9  | 0.15 | 11.3 |
| 2019/10/4 5:00  | 25.11 | 95.2 | -1.1  | 0.13 | 11.3 |

|                 |       |      |       |      |      |
|-----------------|-------|------|-------|------|------|
| 2019/10/4 6:00  | 25.04 | 95.4 | 0.6   | 0.13 | 11.2 |
| 2019/10/4 7:00  | 24.95 | 95   | 100.9 | 0.14 | 11.2 |
| 2019/10/4 8:00  | 26.59 | 88.3 | 317.9 | 0.34 | 11.2 |
| 2019/10/4 9:00  | 27.87 | 83.5 | 482.4 | 0.50 | 11.2 |
| 2019/10/4 10:00 | 27.97 | 84.6 | 771.1 | 0.47 | 11.1 |
| 2019/10/4 11:00 | 28.01 | 82.4 | 901.7 | 0.53 | 11.1 |
| 2019/10/4 12:00 | 28.16 | 80.2 | 946   | 0.60 | 11.7 |
| 2019/10/4 13:00 | 28.18 | 83.2 | 914.5 | 0.51 | 11.7 |
| 2019/10/4 14:00 | 28.33 | 81.8 | 829.4 | 0.56 | 12.3 |
| 2019/10/4 15:00 | 28.45 | 81.1 | 692.4 | 0.58 | 12.3 |
| 2019/10/4 16:00 | 28.49 | 81.1 | 466.4 | 0.58 | 12.2 |
| 2019/10/4 17:00 | 28.61 | 79.8 | 201.8 | 0.62 | 12.1 |
| 2019/10/4 18:00 | 28.5  | 80.1 | 31    | 0.61 | 12   |
| 2019/10/4 19:00 | 28.51 | 79.4 | -1.1  | 0.63 | 12   |
| 2019/10/4 20:00 | 28.43 | 81.7 | -0.9  | 0.56 | 11.9 |
| 2019/10/4 21:00 | 28.47 | 80.9 | -1    | 0.59 | 11.9 |
| 2019/10/4 22:00 | 28.36 | 81.5 | -1    | 0.57 | 11.8 |
| 2019/10/4 23:00 | 27.03 | 86.3 | -0.8  | 0.40 | 11.8 |
| 2019/10/5 0:00  | 25.92 | 89.8 | -0.8  | 0.29 | 11.7 |
| 2019/10/5 1:00  | 25.49 | 91.6 | -0.8  | 0.23 | 11.7 |
| 2019/10/5 2:00  | 25.25 | 93.1 | -0.9  | 0.19 | 11.6 |
| 2019/10/5 3:00  | 24.97 | 94.9 | -0.8  | 0.14 | 11.6 |
| 2019/10/5 4:00  | 24.49 | 95.9 | -0.6  | 0.11 | 11.6 |
| 2019/10/5 5:00  | 24.35 | 96.2 | -0.7  | 0.10 | 11.5 |
| 2019/10/5 6:00  | 23.94 | 96.7 | 0.6   | 0.09 | 11.5 |
| 2019/10/5 7:00  | 24.13 | 96.2 | 96.1  | 0.10 | 11.5 |
| 2019/10/5 8:00  | 26.08 | 90.5 | 311.6 | 0.27 | 11.4 |
| 2019/10/5 9:00  | 28.27 | 82.5 | 556.6 | 0.53 | 11.4 |
| 2019/10/5 10:00 | 28.56 | 81   | 769.9 | 0.59 | 11.4 |
| 2019/10/5 11:00 | 28.64 | 82.7 | 895.2 | 0.53 | 11.4 |
| 2019/10/5 12:00 | 28.63 | 82.5 | 937.1 | 0.54 | 11.3 |
| 2019/10/5 13:00 | 28.67 | 81   | 920.8 | 0.59 | 11.3 |
| 2019/10/5 14:00 | 28.78 | 79.6 | 878.9 | 0.63 | 11.2 |
| 2019/10/5 15:00 | 28.87 | 79.1 | 713   | 0.65 | 11.2 |
| 2019/10/5 16:00 | 29.02 | 77.5 | 553.7 | 0.70 | 11.1 |
| 2019/10/5 17:00 | 29.04 | 77.8 | 318.5 | 0.69 | 11.1 |
| 2019/10/5 18:00 | 28.77 | 79.4 | 35.8  | 0.64 | 11   |
| 2019/10/5 19:00 | 28.55 | 81.3 | -1.1  | 0.58 | 11   |
| 2019/10/5 20:00 | 28.49 | 82   | -1    | 0.55 | 10.9 |
| 2019/10/5 21:00 | 28.46 | 81.9 | -1    | 0.56 | 10.9 |
| 2019/10/5 22:00 | 28.44 | 81.6 | -0.7  | 0.57 | 10.8 |
| 2019/10/5 23:00 | 27.51 | 87.4 | -0.5  | 0.38 | 10.8 |

|                 |       |      |       |      |      |
|-----------------|-------|------|-------|------|------|
| 2019/10/6 0:00  | 27.2  | 88.4 | -0.9  | 0.34 | 10.8 |
| 2019/10/6 1:00  | 26.3  | 90.6 | -0.5  | 0.27 | 10.7 |
| 2019/10/6 2:00  | 25.68 | 93.7 | -0.8  | 0.18 | 10.7 |
| 2019/10/6 3:00  | 25.7  | 93.9 | -0.7  | 0.17 | 10.7 |
| 2019/10/6 4:00  | 26.06 | 93.3 | -0.7  | 0.19 | 10.7 |
| 2019/10/6 5:00  | 25.97 | 93.3 | -0.9  | 0.19 | 10.6 |
| 2019/10/6 6:00  | 26.04 | 92.9 | 1.1   | 0.20 | 10.6 |
| 2019/10/6 7:00  | 25.68 | 93.5 | 116   | 0.18 | 10.6 |
| 2019/10/6 8:00  | 26.87 | 88.6 | 209.3 | 0.33 | 10.5 |
| 2019/10/6 9:00  | 28.3  | 83.8 | 365.7 | 0.50 | 10.5 |
| 2019/10/6 10:00 | 28.26 | 84.4 | 292.5 | 0.48 | 10.5 |
| 2019/10/6 11:00 | 28.27 | 84.4 | 439.3 | 0.48 | 10.5 |
| 2019/10/6 12:00 | 28.29 | 83.7 | 647.8 | 0.50 | 10.4 |
| 2019/10/6 13:00 | 28.57 | 81.3 | 674.9 | 0.58 | 10.4 |
| 2019/10/6 14:00 | 28.53 | 81.5 | 461.5 | 0.57 | 10.4 |
| 2019/10/6 15:00 | 28.79 | 81.8 | 709.4 | 0.57 | 10.4 |
| 2019/10/6 16:00 | 28.6  | 83   | 444.8 | 0.52 | 10.3 |
| 2019/10/6 17:00 | 28.42 | 83.6 | 185   | 0.50 | 10.3 |
| 2019/10/6 18:00 | 28.36 | 82.6 | 25    | 0.53 | 10.3 |
| 2019/10/6 19:00 | 28.49 | 80.4 | -0.9  | 0.60 | 10.2 |
| 2019/10/6 20:00 | 28.57 | 81.3 | -0.8  | 0.58 | 10.2 |
| 2019/10/6 21:00 | 28.62 | 79.9 | -0.8  | 0.62 | 10.2 |
| 2019/10/6 22:00 | 28.49 | 79.6 | -0.6  | 0.63 | 10.1 |
| 2019/10/6 23:00 | 26.8  | 88.3 | -0.5  | 0.34 | 10.1 |
| 2019/10/7 0:00  | 25.92 | 91.9 | -0.9  | 0.23 | 10.1 |
| 2019/10/7 1:00  | 25.72 | 92.9 | -0.9  | 0.20 | 10.1 |
| 2019/10/7 2:00  | 25.42 | 94.1 | -0.8  | 0.16 | 10   |
| 2019/10/7 3:00  | 24.87 | 96.1 | -0.8  | 0.11 | 10   |
| 2019/10/7 4:00  | 24.45 | 97   | -0.9  | 0.08 | 10   |
| 2019/10/7 5:00  | 24.5  | 97.3 | -1    | 0.07 | 10   |
| 2019/10/7 6:00  | 24.46 | 97.3 | 0.4   | 0.07 | 9.9  |
| 2019/10/7 7:00  | 24.4  | 96.1 | 60.2  | 0.10 | 9.9  |
| 2019/10/7 8:00  | 25.4  | 91.5 | 234.1 | 0.24 | 9.9  |
| 2019/10/7 9:00  | 27.27 | 81   | 516.4 | 0.56 | 9.9  |
| 2019/10/7 10:00 | 28.9  | 73.5 | 690.2 | 0.83 | 9.9  |
| 2019/10/7 11:00 | 28.18 | 78.6 | 851.6 | 0.65 | 9.9  |
| 2019/10/7 12:00 | 28.1  | 78.6 | 954   | 0.65 | 9.8  |
| 2019/10/7 13:00 | 28.07 | 79.3 | 922.4 | 0.63 | 9.8  |
| 2019/10/7 14:00 | 28.12 | 78.9 | 818.6 | 0.64 | 9.8  |
| 2019/10/7 15:00 | 28.22 | 78   | 670.2 | 0.67 | 9.8  |
| 2019/10/7 16:00 | 28.17 | 79.1 | 433.5 | 0.64 | 9.7  |
| 2019/10/7 17:00 | 28.2  | 80.1 | 212.3 | 0.61 | 9.7  |

|                 |       |      |       |      |     |
|-----------------|-------|------|-------|------|-----|
| 2019/10/7 18:00 | 28.12 | 81   | 23    | 0.58 | 9.7 |
| 2019/10/7 19:00 | 28.14 | 82.9 | -0.6  | 0.52 | 9.6 |
| 2019/10/7 20:00 | 28.29 | 81.7 | -0.7  | 0.56 | 9.6 |
| 2019/10/7 21:00 | 28.49 | 79.4 | -0.7  | 0.63 | 9.6 |
| 2019/10/7 22:00 | 27.85 | 81.9 | -0.3  | 0.55 | 9.6 |
| 2019/10/7 23:00 | 26.42 | 87.6 | -0.4  | 0.36 | 9.6 |
| 2019/10/8 0:00  | 25.91 | 86.7 | -0.5  | 0.38 | 9.5 |
| 2019/10/8 1:00  | 25.13 | 91   | -0.6  | 0.25 | 9.5 |
| 2019/10/8 2:00  | 24.96 | 93.4 | -0.9  | 0.18 | 9.5 |
| 2019/10/8 3:00  | 25.11 | 93.8 | -0.9  | 0.17 | 9.5 |
| 2019/10/8 4:00  | 24.89 | 94.4 | -0.8  | 0.15 | 9.5 |
| 2019/10/8 5:00  | 24.98 | 92.1 | -0.7  | 0.22 | 9.5 |
| 2019/10/8 6:00  | 24.95 | 91.8 | 0.7   | 0.22 | 9.4 |
| 2019/10/8 7:00  | 25.12 | 89.6 | 74.8  | 0.29 | 9.4 |
| 2019/10/8 8:00  | 26.15 | 86.3 | 209.7 | 0.39 | 9.4 |
| 2019/10/8 9:00  | 27    | 82.3 | 296.2 | 0.52 | 9.4 |
| 2019/10/8 10:00 | 27.59 | 78.8 | 372   | 0.63 | 9.4 |
| 2019/10/8 11:00 | 28.58 | 75.3 | 553.6 | 0.76 | 9.4 |
| 2019/10/8 12:00 | 28.36 | 77.5 | 612.2 | 0.69 | 9.3 |
| 2019/10/8 13:00 | 28.13 | 80.5 | 480.4 | 0.59 | 9.3 |
| 2019/10/8 14:00 | 28.37 | 80.4 | 627   | 0.60 |     |
| 2019/10/8 15:00 | 28.28 | 79.6 | 697.2 | 0.62 |     |
| 2019/10/8 16:00 | 28.41 | 78.1 | 468   | 0.67 | 9.2 |
| 2019/10/8 17:00 | 28.33 | 79.7 | 225.4 | 0.62 | 9.2 |
| 2019/10/8 18:00 | 28.21 | 82   | 34.3  | 0.55 | 9.1 |
| 2019/10/8 19:00 | 28.35 | 80   | -0.8  | 0.61 | 9.1 |
| 2019/10/8 20:00 | 28.38 | 81.1 | -0.5  | 0.58 | 9.1 |
| 2019/10/8 21:00 | 28    | 83   | -0.4  | 0.52 | 9.1 |
| 2019/10/8 22:00 | 27.05 | 84.1 | 0.4   | 0.47 | 9   |
| 2019/10/8 23:00 | 25.21 | 86.8 | -0.5  | 0.36 | 9   |
| 2019/10/9 0:00  | 24.56 | 90.9 | -1.2  | 0.24 | 9   |
| 2019/10/9 1:00  | 24.62 | 91.9 | -1.1  | 0.22 | 9   |
| 2019/10/9 2:00  | 24.29 | 93.7 | -0.8  | 0.17 | 9   |
| 2019/10/9 3:00  | 24.7  | 93.6 | -0.7  | 0.17 | 9   |
| 2019/10/9 4:00  | 24.52 | 94   | -0.5  | 0.16 | 9   |
| 2019/10/9 5:00  | 24.1  | 94.7 | -0.5  | 0.14 | 9   |
| 2019/10/9 6:00  | 23.7  | 95.4 | 0.3   | 0.12 | 8.9 |
| 2019/10/9 7:00  | 23.86 | 94.5 | 45.2  | 0.14 | 8.9 |
| 2019/10/9 8:00  | 24.58 | 91   | 118   | 0.24 | 8.9 |
| 2019/10/9 9:00  | 25.96 | 83.6 | 320.6 | 0.46 | 8.9 |
| 2019/10/9 10:00 | 27.81 | 77.7 | 760.6 | 0.67 | 8.9 |
| 2019/10/9 11:00 | 28.02 | 79.5 | 852.1 | 0.62 | 8.9 |

---

|                  |       |      |       |      |      |
|------------------|-------|------|-------|------|------|
| 2019/10/9 12:00  | 28.43 | 79   | 589.9 | 0.65 | 8.8  |
| 2019/10/9 13:00  | 28.57 | 80.1 | 536.1 | 0.61 | 8.8  |
| 2019/10/9 14:00  | 28.12 | 85   | 237.6 | 0.46 | 8.8  |
| 2019/10/9 15:00  | 28.27 | 83.5 | 303.1 | 0.50 | 8.8  |
| 2019/10/9 16:00  | 28.32 | 83.4 | 339.8 | 0.51 | 8.8  |
| 2019/10/9 17:00  | 28.57 | 80.8 | 280.3 | 0.59 | 8.8  |
| 2019/10/9 18:00  | 28.5  | 80.3 | 25.9  | 0.61 | 8.8  |
| 2019/10/9 19:00  | 25.54 | 85.6 | 0.6   | 0.40 | 8.8  |
| 2019/10/9 20:00  | 24.58 | 87.5 | -0.4  | 0.34 | 8.8  |
| 2019/10/9 21:00  | 24.56 | 89.2 | -0.8  | 0.29 | 8.7  |
| 2019/10/9 22:00  | 24.94 | 88   | -0.7  | 0.33 | 8.7  |
| 2019/10/9 23:00  | 24.97 | 87.9 | -0.5  | 0.33 | 8.7  |
| 2019/10/10 0:00  | 24.23 | 91.6 | -0.7  | 0.22 | 8.7  |
| 2019/10/10 1:00  | 23.99 | 92.5 | -0.8  | 0.20 | 8.7  |
| 2019/10/10 2:00  | 24.02 | 91.5 | -0.7  | 0.22 | 8.7  |
| 2019/10/10 3:00  | 24.29 | 90.6 | -0.8  | 0.25 | 8.7  |
| 2019/10/10 4:00  | 24.19 | 91.5 | -0.8  | 0.23 | 8.7  |
| 2019/10/10 5:00  | 24.25 | 94.4 | -0.9  | 0.15 | 8.6  |
| 2019/10/10 6:00  | 24.25 | 94.9 | 0.6   | 0.14 | 8.6  |
| 2019/10/10 7:00  | 24.31 | 94.1 | 94.1  | 0.16 | 8.6  |
| 2019/10/10 8:00  | 25.57 | 89.1 | 309.5 | 0.30 | 8.6  |
| 2019/10/10 9:00  | 27.98 | 79.8 | 549.8 | 0.61 | 8.6  |
| 2019/10/10 10:00 | 29.52 | 74.2 | 733.9 | 0.82 | 8.6  |
| 2019/10/10 11:00 | 29.97 | 73.9 | 657.4 | 0.84 | 8.5  |
| 2019/10/10 12:00 | 28.9  | 81.9 | 614.5 | 0.56 | 8.5  |
| 2019/10/10 13:00 | 28.73 | 82.1 | 698.5 | 0.55 | 8.5  |
| 2019/10/10 14:00 | 28.75 | 82.3 | 790.3 | 0.55 | 14.3 |
| 2019/10/10 15:00 | 28.68 | 82.1 | 618.7 | 0.55 | 13.7 |
| 2019/10/10 16:00 | 28.9  | 80.4 | 443.4 | 0.61 | 18.4 |
| 2019/10/10 17:00 | 28.93 | 82.1 | 159.8 | 0.56 | 17.3 |
| 2019/10/10 18:00 | 28.24 | 81.4 | 21.7  | 0.57 | 16.7 |
| 2019/10/10 19:00 | 25.46 | 85.1 | -0.9  | 0.41 | 16.3 |
| 2019/10/10 20:00 | 25.55 | 86.4 | -0.7  | 0.38 | 16.7 |
| 2019/10/10 21:00 | 25.35 | 89.3 | -0.7  | 0.30 | 16.6 |
| 2019/10/10 22:00 | 25.31 | 92   | -0.9  | 0.22 | 16.4 |
| 2019/10/10 23:00 | 25.37 | 91.1 | -0.9  | 0.25 | 16.2 |
| 2019/10/11 0:00  | 25.37 | 90.2 | -0.8  | 0.27 | 16   |
| 2019/10/11 1:00  | 25.22 | 91.7 | -0.9  | 0.23 | 15.8 |
| 2019/10/11 2:00  | 25.18 | 92.7 | -0.9  | 0.20 | 15.6 |
| 2019/10/11 3:00  | 24.97 | 95   | -0.9  | 0.14 | 15.5 |
| 2019/10/11 4:00  | 24.7  | 95.4 | -1    | 0.12 | 15.3 |
| 2019/10/11 5:00  | 24.47 | 96   | -0.9  | 0.11 | 15.2 |

---

|                  |       |      |       |      |      |
|------------------|-------|------|-------|------|------|
| 2019/10/11 6:00  | 24.43 | 96.2 | 0.3   | 0.10 | 15.1 |
| 2019/10/11 7:00  | 24.65 | 95.2 | 92.2  | 0.13 | 14.9 |
| 2019/10/11 8:00  | 26.18 | 90   | 307.5 | 0.29 | 14.8 |
| 2019/10/11 9:00  | 27.91 | 82.8 | 554.9 | 0.52 | 14.7 |
| 2019/10/11 10:00 | 28.54 | 81.1 | 590.1 | 0.58 | 14.7 |
| 2019/10/11 11:00 | 28.63 | 80.4 | 737.4 | 0.61 | 14.6 |
| 2019/10/11 12:00 | 28.64 | 79.9 | 933.1 | 0.62 | 14.4 |
| 2019/10/11 13:00 | 28.59 | 79.7 | 895.1 | 0.63 | 14.3 |
| 2019/10/11 14:00 | 28.72 | 77.8 | 807.1 | 0.69 | 14.1 |
| 2019/10/11 15:00 | 28.7  | 79.5 | 658.8 | 0.64 | 13.9 |
| 2019/10/11 16:00 | 28.78 | 78.5 | 446.6 | 0.67 | 13.7 |
| 2019/10/11 17:00 | 28.81 | 77.1 | 205.8 | 0.71 | 13.5 |
| 2019/10/11 18:00 | 28.75 | 80.2 | 24.4  | 0.61 | 13.4 |
| 2019/10/11 19:00 | 28.76 | 80.4 | -0.9  | 0.61 | 13.3 |
| 2019/10/11 20:00 | 28.66 | 80.3 | -0.9  | 0.61 | 13.2 |
| 2019/10/11 21:00 | 28.29 | 82.2 | -0.6  | 0.54 | 13.1 |
| 2019/10/11 22:00 | 27.6  | 84.7 | -1    | 0.46 | 13   |
| 2019/10/11 23:00 | 26.94 | 86.4 | -0.7  | 0.40 | 12.9 |
| 2019/10/12 0:00  | 26.35 | 87   | -1.1  | 0.37 | 12.8 |
| 2019/10/12 1:00  | 25.99 | 88.2 | -0.9  | 0.33 | 12.8 |
| 2019/10/12 2:00  | 25.47 | 90.8 | -1    | 0.26 | 12.7 |
| 2019/10/12 3:00  | 25.28 | 91.4 | -1    | 0.24 | 12.6 |
| 2019/10/12 4:00  | 24.74 | 93.1 | -0.8  | 0.19 | 12.6 |
| 2019/10/12 5:00  | 24.61 | 94.3 | -1.1  | 0.15 | 12.5 |
| 2019/10/12 6:00  | 24.62 | 94.9 | 0.4   | 0.14 | 12.5 |
| 2019/10/12 7:00  | 25.05 | 93.9 | 97.5  | 0.17 | 12.4 |
| 2019/10/12 8:00  | 26.45 | 89   | 311.2 | 0.32 | 12.4 |
| 2019/10/12 9:00  | 27.88 | 81.1 | 530.8 | 0.57 | 12.3 |
| 2019/10/12 10:00 | 28.15 | 80.1 | 751.1 | 0.61 | 12.3 |
| 2019/10/12 11:00 | 28.16 | 81.1 | 886.6 | 0.58 | 12.2 |
| 2019/10/12 12:00 | 28.24 | 81.6 | 929.5 | 0.56 | 12.1 |
| 2019/10/12 13:00 | 28.4  | 80.9 | 901.5 | 0.59 | 12   |
| 2019/10/12 14:00 | 28.49 | 79.4 | 799.1 | 0.63 | 11.9 |
| 2019/10/12 15:00 | 28.6  | 77.9 | 667.9 | 0.68 | 11.8 |
| 2019/10/12 16:00 | 28.59 | 79   | 457.5 | 0.65 | 11.7 |
| 2019/10/12 17:00 | 28.6  | 80.1 | 181.5 | 0.61 | 11.6 |
| 2019/10/12 18:00 | 28.5  | 80.6 | 18.4  | 0.60 | 11.5 |
| 2019/10/12 19:00 | 28.54 | 79.8 | -0.8  | 0.62 | 11.4 |
| 2019/10/12 20:00 | 28.49 | 76.7 | -0.8  | 0.72 | 11.4 |
| 2019/10/12 21:00 | 28.52 | 80.7 | -0.8  | 0.59 | 11.3 |
| 2019/10/12 22:00 | 28.52 | 81.1 | -0.5  | 0.58 | 11.3 |
| 2019/10/12 23:00 | 27.54 | 84.7 | -0.3  | 0.46 | 11.3 |

---

|                  |       |      |       |      |      |
|------------------|-------|------|-------|------|------|
| 2019/10/13 0:00  | 26.68 | 86.3 | -0.9  | 0.40 | 11.2 |
| 2019/10/13 1:00  | 26.07 | 89.1 | -0.7  | 0.31 | 11.1 |
| 2019/10/13 2:00  | 25.65 | 91.2 | -0.8  | 0.25 | 11.1 |
| 2019/10/13 3:00  | 25.14 | 92.6 | -0.9  | 0.20 | 11.1 |
| 2019/10/13 4:00  | 25.03 | 92.5 | -1    | 0.21 | 11   |
| 2019/10/13 5:00  | 24.97 | 92.7 | -1.1  | 0.20 | 11   |
| 2019/10/13 6:00  | 24.71 | 93.6 | 0.3   | 0.17 | 10.9 |
| 2019/10/13 7:00  | 24.82 | 93.8 | 95    | 0.17 | 10.9 |
| 2019/10/13 8:00  | 26.34 | 86.4 | 312.5 | 0.39 | 10.9 |
| 2019/10/13 9:00  | 27.98 | 77.8 | 555   | 0.67 | 10.8 |
| 2019/10/13 10:00 | 29.37 | 68.6 | 725.3 | 0.99 | 10.8 |
| 2019/10/13 11:00 | 29.31 | 70.4 | 688.8 | 0.93 | 10.8 |
| 2019/10/13 12:00 | 28.51 | 77.7 | 941.8 | 0.69 | 10.7 |
| 2019/10/13 13:00 | 28.43 | 75.6 | 907.6 | 0.75 | 10.6 |
| 2019/10/13 14:00 | 28.5  | 73.5 | 816   | 0.82 | 10.5 |
| 2019/10/13 15:00 | 28.72 | 69.9 | 672   | 0.93 | 10.4 |
| 2019/10/13 16:00 | 28.7  | 70.5 | 456.7 | 0.91 | 10.3 |
| 2019/10/13 17:00 | 28.56 | 72.9 | 211.6 | 0.84 | 10.2 |
| 2019/10/13 18:00 | 28.34 | 75.1 | 24.9  | 0.76 | 10.1 |
| 2019/10/13 19:00 | 28.28 | 74.9 | -1.2  | 0.77 | 10.1 |
| 2019/10/13 20:00 | 27.79 | 75.2 | -0.8  | 0.75 | 10.1 |
| 2019/10/13 21:00 | 26.5  | 81.9 | -0.9  | 0.52 | 10.1 |
| 2019/10/13 22:00 | 26.16 | 82.6 | -1.2  | 0.50 | 10   |
| 2019/10/13 23:00 | 26.89 | 82.6 | -1.3  | 0.51 | 10   |
| 2019/10/14 0:00  | 27.48 | 84.2 | -0.8  | 0.47 | 10   |
| 2019/10/14 1:00  | 26.91 | 86.7 | -0.8  | 0.39 | 10   |
| 2019/10/14 2:00  | 26.47 | 89.2 | -0.8  | 0.31 | 9.9  |
| 2019/10/14 3:00  | 26.25 | 89.4 | -0.9  | 0.30 | 9.9  |
| 2019/10/14 4:00  | 25.98 | 90.5 | -1    | 0.27 | 9.9  |
| 2019/10/14 5:00  | 25.63 | 91.7 | -0.8  | 0.23 | 9.9  |
| 2019/10/14 6:00  | 25.45 | 91.8 | 0.2   | 0.23 | 9.9  |
| 2019/10/14 7:00  | 25    | 92.3 | 80.4  | 0.21 | 9.8  |
| 2019/10/14 8:00  | 26.23 | 88.9 | 292.1 | 0.32 | 9.8  |
| 2019/10/14 9:00  | 28.26 | 79   | 538.2 | 0.64 | 9.8  |
| 2019/10/14 10:00 | 29.56 | 71.9 | 690.6 | 0.89 | 9.8  |
| 2019/10/14 11:00 | 28.61 | 80.3 | 702.9 | 0.61 | 9.7  |
| 2019/10/14 12:00 | 28.68 | 80.3 | 922.7 | 0.61 | 9.6  |
| 2019/10/14 13:00 | 28.49 | 83.8 | 887.2 | 0.50 | 9.5  |
| 2019/10/14 14:00 | 28.51 | 82.8 | 797.8 | 0.53 | 9.5  |
| 2019/10/14 15:00 | 28.63 | 80.7 | 669.9 | 0.60 | 9.4  |
| 2019/10/14 16:00 | 28.65 | 80.8 | 437.8 | 0.59 | 9.4  |
| 2019/10/14 17:00 | 28.71 | 79.6 | 134.1 | 0.63 | 9.3  |



|                  |       |      |       |      |     |
|------------------|-------|------|-------|------|-----|
| 2019/10/14 18:00 | 28.71 | 81.2 | 33.8  | 0.58 | 9.3 |
| 2019/10/14 19:00 | 28.75 | 81.6 | -0.7  | 0.57 | 9.3 |
| 2019/10/14 20:00 | 28.67 | 82.1 | -0.7  | 0.55 | 9.3 |
| 2019/10/14 21:00 | 28.55 | 85   | -0.9  | 0.46 | 9.2 |
| 2019/10/14 22:00 | 28.44 | 86.9 | -0.9  | 0.40 | 9.2 |
| 2019/10/14 23:00 | 27.9  | 79.4 | -0.8  | 0.62 | 9.2 |
| 2019/10/15 0:00  | 26.79 | 81.3 | -0.7  | 0.54 | 9.2 |
| 2019/10/15 1:00  | 26.11 | 84.1 | -1.1  | 0.45 | 9.2 |
| 2019/10/15 2:00  | 26.17 | 84.7 | -1.1  | 0.44 | 9.1 |
| 2019/10/15 3:00  | 26.77 | 84.7 | -1.1  | 0.45 | 9.1 |
| 2019/10/15 4:00  | 26.92 | 86.7 | -0.9  | 0.39 | 9.1 |
| 2019/10/15 5:00  | 27.44 | 88.4 | -1    | 0.35 | 9.1 |
| 2019/10/15 6:00  | 27.4  | 88.1 | 0.3   | 0.35 | 9.1 |
| 2019/10/15 7:00  | 27.35 | 86   | 83    | 0.42 | 9.1 |
| 2019/10/15 8:00  | 28.03 | 81.1 | 306.9 | 0.57 | 9.1 |
| 2019/10/15 9:00  | 29.11 | 75   | 522.2 | 0.78 | 9   |
| 2019/10/15 10:00 | 30.15 | 68.7 | 625.1 | 1.01 | 9   |
| 2019/10/15 11:00 | 31.03 | 63.1 | 649   | 1.23 | 8.9 |
| 2019/10/15 12:00 | 31.9  | 58.2 | 763.7 | 1.42 | 8.9 |
| 2019/10/15 13:00 | 32.57 | 56   | 807.6 | 1.52 | 8.8 |
| 2019/10/15 14:00 | 32.06 | 57.8 | 849.5 | 1.44 | 8.8 |
| 2019/10/15 15:00 | 31.76 | 60.3 | 548.5 | 1.35 | 8.7 |
| 2019/10/15 16:00 | 31.13 | 62.9 | 352.3 | 1.24 | 8.7 |
| 2019/10/15 17:00 | 30.45 | 66.5 | 118.1 | 1.09 | 8.6 |
| 2019/10/15 18:00 | 29.39 | 75.6 | 4.9   | 0.77 | 8.6 |
| 2019/10/15 19:00 | 28.36 | 85.2 | 0     | 0.45 | 8.5 |
| 2019/10/15 20:00 | 27.25 | 87.1 | -0.5  | 0.38 | 8.5 |
| 2019/10/15 21:00 | 27.09 | 84.4 | -0.5  | 0.46 | 8.5 |
| 2019/10/15 22:00 | 26.82 | 86.8 | -0.4  | 0.38 | 8.5 |
| 2019/10/15 23:00 | 26.4  | 89.6 | -0.7  | 0.30 | 8.5 |
| 2019/10/16 0:00  | 26.07 | 91.6 | -0.7  | 0.24 | 8.5 |
| 2019/10/16 1:00  | 25.71 | 92.7 | -0.8  | 0.20 | 8.5 |
| 2019/10/16 2:00  | 25.54 | 93.4 | -0.9  | 0.18 | 8.5 |
| 2019/10/16 3:00  | 25.35 | 94.4 | -0.9  | 0.16 | 8.4 |
| 2019/10/16 4:00  | 25.28 | 94.7 | -0.8  | 0.15 | 8.4 |
| 2019/10/16 5:00  | 25.11 | 94.7 | -0.8  | 0.15 | 8.4 |
| 2019/10/16 6:00  | 24.86 | 95.3 | 2     | 0.13 | 8.4 |
| 2019/10/16 7:00  | 24.97 | 94.9 | 97.8  | 0.14 | 8.4 |
| 2019/10/16 8:00  | 26.09 | 90.8 | 328.3 | 0.26 | 8.4 |
| 2019/10/16 9:00  | 27.67 | 84.9 | 513.1 | 0.45 | 8.4 |
| 2019/10/16 10:00 | 29.04 | 77.8 | 740   | 0.69 | 8.3 |
| 2019/10/16 11:00 | 30.5  | 69.7 | 858.2 | 0.99 | 8.3 |

|                  |       |      |       |      |      |
|------------------|-------|------|-------|------|------|
| 2019/10/16 12:00 | 31.73 | 63   | 874.9 | 1.25 | 8.2  |
| 2019/10/16 13:00 | 32.74 | 58.5 | 860.2 | 1.44 | 8.2  |
| 2019/10/16 14:00 | 33.31 | 55.5 | 713.2 | 1.57 | 8.1  |
| 2019/10/16 15:00 | 33.46 | 54.7 | 634.4 | 1.61 | 8.1  |
| 2019/10/16 16:00 | 33.48 | 55.1 | 489.6 | 1.59 | 8    |
| 2019/10/16 17:00 | 31.26 | 73.5 | 239.7 | 0.89 | 8    |
| 2019/10/16 18:00 | 29.02 | 88.6 | 22.6  | 0.36 | 8    |
| 2019/10/16 19:00 | 29.01 | 88.8 | -0.7  | 0.35 | 8    |
| 2019/10/16 20:00 | 28.84 | 89.4 | -0.5  | 0.33 | 8    |
| 2019/10/16 21:00 | 27.72 | 88.1 | -0.1  | 0.36 | 7.9  |
| 2019/10/16 22:00 | 27.13 | 87.8 | -0.9  | 0.36 | 12.4 |
| 2019/10/16 23:00 | 27.47 | 89.1 | -0.9  | 0.32 | 12   |
| 2019/10/17 0:00  | 27.11 | 88.8 | -0.3  | 0.33 | 11.7 |
| 2019/10/17 1:00  | 26.18 | 93   | -0.5  | 0.20 | 11.6 |
| 2019/10/17 2:00  | 25.87 | 94.1 | -0.6  | 0.17 | 11.3 |
| 2019/10/17 3:00  | 25.61 | 94.7 | -0.6  | 0.15 | 11.2 |
| 2019/10/17 4:00  | 25.47 | 95   | -0.7  | 0.14 | 11.1 |
| 2019/10/17 5:00  | 25.61 | 94.5 | -0.7  | 0.15 | 11   |
| 2019/10/17 6:00  | 25.5  | 94.5 | 0     | 0.15 | 11   |
| 2019/10/17 7:00  | 25.29 | 95.3 | 36.3  | 0.13 | 10.9 |
| 2019/10/17 8:00  | 25.43 | 95.2 | 168.2 | 0.13 | 10.8 |
| 2019/10/17 9:00  | 26.42 | 91.9 | 334   | 0.23 | 10.8 |
| 2019/10/17 10:00 | 28.33 | 82.1 | 632.1 | 0.55 | 10.8 |
| 2019/10/17 11:00 | 29.59 | 74.7 | 784.2 | 0.81 | 10.6 |
| 2019/10/17 12:00 | 30.45 | 69.4 | 661.9 | 1.00 | 10.4 |
| 2019/10/17 13:00 | 31.16 | 64.1 | 563.7 | 1.20 |      |
| 2019/10/17 14:00 | 32.02 | 60.1 | 750.1 | 1.36 |      |
| 2019/10/17 15:00 | 32.26 | 58.8 | 453.9 | 1.42 |      |
| 2019/10/17 16:00 | 29.79 | 77.5 | 276.2 | 0.72 |      |
| 2019/10/17 17:00 | 29.36 | 80.1 | 153.3 | 0.63 |      |
| 2019/10/17 18:00 | 29.11 | 81.4 | 12.5  | 0.58 |      |
| 2019/10/17 19:00 | 28.85 | 83.7 | -1    | 0.51 |      |
| 2019/10/17 20:00 | 28.73 | 84   | -0.9  | 0.50 |      |
| 2019/10/17 21:00 | 28.65 | 85   | -0.8  | 0.46 |      |
| 2019/10/17 22:00 | 28.07 | 90.4 | -0.7  | 0.29 |      |
| 2019/10/17 23:00 | 26.84 | 91.9 | -0.4  | 0.24 |      |
| 2019/10/18 0:00  | 26.65 | 91.9 | -0.7  | 0.23 |      |
| 2019/10/18 1:00  | 25.93 | 95.6 | -0.7  | 0.12 |      |
| 2019/10/18 2:00  | 25.79 | 96.3 | -0.4  | 0.10 |      |
| 2019/10/18 3:00  | 25.89 | 96.2 | -0.4  | 0.11 |      |
| 2019/10/18 4:00  | 25.21 | 95.7 | 0.3   | 0.12 |      |
| 2019/10/18 5:00  | 25.27 | 96   | -0.3  | 0.11 |      |

|                  |       |      |       |      |
|------------------|-------|------|-------|------|
| 2019/10/18 6:00  | 25.36 | 97   | -0.2  | 0.08 |
| 2019/10/18 7:00  | 25.45 | 96.5 | 42.9  | 0.10 |
| 2019/10/18 8:00  | 25.94 | 94.6 | 174.4 | 0.15 |
| 2019/10/18 9:00  | 27.02 | 90.4 | 368.9 | 0.28 |
| 2019/10/18 10:00 | 28.12 | 86.7 | 423   | 0.40 |
| 2019/10/18 11:00 | 28.48 | 83.7 | 323.4 | 0.50 |
| 2019/10/18 12:00 | 28.13 | 87.3 | 268.6 | 0.39 |
| 2019/10/18 13:00 | 28.7  | 83.5 | 411.1 | 0.51 |
| 2019/10/18 14:00 | 29.3  | 79.8 | 623.8 | 0.64 |
| 2019/10/18 15:00 | 29.5  | 77.7 | 505.6 | 0.71 |
| 2019/10/18 16:00 | 29.34 | 78.6 | 330.7 | 0.68 |
| 2019/10/18 17:00 | 29.23 | 77.4 | 158   | 0.71 |
| 2019/10/18 18:00 | 28.93 | 80.1 | 17.3  | 0.62 |
| 2019/10/18 19:00 | 28.34 | 82.4 | -0.7  | 0.54 |
| 2019/10/18 20:00 | 27.27 | 87.2 | -0.7  | 0.38 |
| 2019/10/18 21:00 | 26.7  | 91.2 | -0.8  | 0.26 |
| 2019/10/18 22:00 | 26.15 | 96.3 | -0.9  | 0.11 |
| 2019/10/18 23:00 | 25.94 | 96.1 | -0.9  | 0.11 |
| 2019/10/19 0:00  | 25.73 | 95.8 | -0.8  | 0.12 |
| 2019/10/19 1:00  | 25.42 | 96.6 | -0.8  | 0.09 |
| 2019/10/19 2:00  | 25.24 | 97.3 | -0.7  | 0.07 |
| 2019/10/19 3:00  | 24.95 | 97.9 | -0.6  | 0.06 |
| 2019/10/19 4:00  | 24.84 | 98.1 | -0.7  | 0.05 |
| 2019/10/19 5:00  | 24.69 | 98   | -0.6  | 0.05 |
| 2019/10/19 6:00  | 24.47 | 97.8 | -0.1  | 0.06 |
| 2019/10/19 7:00  | 24.36 | 97.9 | 85.2  | 0.06 |
| 2019/10/19 8:00  | 25.51 | 95.6 | 306.1 | 0.12 |
| 2019/10/19 9:00  | 27.29 | 89   | 517.1 | 0.33 |
| 2019/10/19 10:00 | 29.57 | 75.6 | 686.2 | 0.78 |
| 2019/10/19 11:00 | 29.88 | 75.2 | 558.1 | 0.80 |
| 2019/10/19 12:00 | 29.37 | 78.9 | 622.2 | 0.67 |
| 2019/10/19 13:00 | 29.51 | 77.1 | 808   | 0.73 |
| 2019/10/19 14:00 | 29.59 | 75.6 | 579.6 | 0.78 |
| 2019/10/19 15:00 | 29.7  | 73.5 | 551   | 0.85 |
| 2019/10/19 16:00 | 29.61 | 74.7 | 365.8 | 0.81 |
| 2019/10/19 17:00 | 29.48 | 74.3 | 138.4 | 0.82 |
| 2019/10/19 18:00 | 29.43 | 73.5 | 8.6   | 0.84 |
| 2019/10/19 19:00 | 29.38 | 73.8 | -0.9  | 0.83 |
| 2019/10/19 20:00 | 29.27 | 76.6 | -0.8  | 0.74 |
| 2019/10/19 21:00 | 29.16 | 79.5 | -0.6  | 0.64 |
| 2019/10/19 22:00 | 29    | 81.3 | -0.6  | 0.58 |
| 2019/10/19 23:00 | 28.86 | 81.7 | -0.5  | 0.57 |

|                  |       |      |       |      |
|------------------|-------|------|-------|------|
| 2019/10/20 0:00  | 27.74 | 87.1 | -0.2  | 0.39 |
| 2019/10/20 1:00  | 26.59 | 90.4 | -0.6  | 0.28 |
| 2019/10/20 2:00  | 26.38 | 91.5 | -0.7  | 0.24 |
| 2019/10/20 3:00  | 25.92 | 93.5 | -0.6  | 0.18 |
| 2019/10/20 4:00  | 25.63 | 94.5 | -0.8  | 0.15 |
| 2019/10/20 5:00  | 25.56 | 94.8 | -0.7  | 0.15 |
| 2019/10/20 6:00  | 25.56 | 95.9 | -0.1  | 0.11 |
| 2019/10/20 7:00  | 25.71 | 96.2 | 76.3  | 0.11 |
| 2019/10/20 8:00  | 26.95 | 91.7 | 297.6 | 0.24 |
| 2019/10/20 9:00  | 28.61 | 80.9 | 530   | 0.59 |
| 2019/10/20 10:00 | 29.46 | 74.6 | 719.1 | 0.81 |
| 2019/10/20 11:00 | 30.6  | 70.3 | 843.1 | 0.97 |
| 2019/10/20 12:00 | 31.69 | 65.1 | 887.5 | 1.18 |
| 2019/10/20 13:00 | 32.53 | 60.8 | 857.8 | 1.36 |
| 2019/10/20 14:00 | 31.49 | 70.7 | 719   | 0.99 |
| 2019/10/20 15:00 | 29.88 | 81.7 | 654.2 | 0.59 |
| 2019/10/20 16:00 | 29.53 | 84.3 | 409.4 | 0.50 |
| 2019/10/20 17:00 | 29.53 | 83.6 | 176.6 | 0.52 |
| 2019/10/20 18:00 | 29.38 | 86   | 17.2  | 0.44 |
| 2019/10/20 19:00 | 29.2  | 88.2 | -0.7  | 0.37 |
| 2019/10/20 20:00 | 29.3  | 87   | -0.8  | 0.41 |
| 2019/10/20 21:00 | 29.03 | 86.3 | -0.7  | 0.43 |
| 2019/10/20 22:00 | 28.35 | 86.7 | -0.6  | 0.41 |
| 2019/10/20 23:00 | 27.66 | 85.4 | -0.6  | 0.44 |
| 2019/10/21 0:00  | 27    | 86.5 | -0.6  | 0.40 |
| 2019/10/21 1:00  | 26.3  | 89.9 | -0.7  | 0.29 |
| 2019/10/21 2:00  | 25.68 | 93.1 | -0.8  | 0.19 |
| 2019/10/21 3:00  | 25.17 | 95.3 | -0.9  | 0.13 |
| 2019/10/21 4:00  | 24.91 | 96.2 | -1.1  | 0.10 |
| 2019/10/21 5:00  | 24.91 | 96.1 | -1.1  | 0.11 |
| 2019/10/21 6:00  | 24.92 | 96.2 | 0     | 0.10 |
| 2019/10/21 7:00  | 25.06 | 95.6 | 83.9  | 0.12 |
| 2019/10/21 8:00  | 26.09 | 91.5 | 309.1 | 0.24 |
| 2019/10/21 9:00  | 28.22 | 80.8 | 544.9 | 0.59 |
| 2019/10/21 10:00 | 29.92 | 72   | 738.6 | 0.90 |
| 2019/10/21 11:00 | 30.93 | 66.1 | 862.6 | 1.12 |
| 2019/10/21 12:00 | 31.75 | 62.3 | 906   | 1.28 |
| 2019/10/21 13:00 | 32.4  | 60   | 837.4 | 1.38 |
| 2019/10/21 14:00 | 33.12 | 57.5 | 796.9 | 1.49 |
| 2019/10/21 15:00 | 33.65 | 55.1 | 647.6 | 1.60 |
| 2019/10/21 16:00 | 33.89 | 54.6 | 421.9 | 1.63 |
| 2019/10/21 17:00 | 33.3  | 56.7 | 155   | 1.53 |

|                  |       |      |      |      |
|------------------|-------|------|------|------|
| 2019/10/21 18:00 | 32.36 | 61   | 16.3 | 1.34 |
| 2019/10/21 19:00 | 31.7  | 62.7 | -0.9 | 1.26 |
| 2019/10/21 20:00 | 30.88 | 66.6 | -0.5 | 1.10 |
| 2019/10/21 21:00 | 29.59 | 72.9 | -0.4 | 0.86 |
| 2019/10/21 22:00 | 28.48 | 77.1 | -0.6 | 0.70 |
| 2019/10/21 23:00 | 27.78 | 79.4 | -0.7 | 0.62 |
| 2019/10/22 0:00  | 27.27 | 82.5 | -0.7 | 0.52 |

The data was downloaded at the webpage of the University Network of Atmospheric Observatories (RUOA), Meteorological Station Sisal (sisl) UNAM, in Yucatan, Mexico. Lat 21.1645 N Lon 90.0484 W Alt 8 masl.

Time UTC-6h Meteorological data

\*This data was measured with a reflectometer in parallel with sapflow.
